# Supplementary material for: Decay of Genes Encoding the Oomycete Flagellar Proteome in the Downy Mildew Hyaloperonospora arabidopsidis
Source: PubMed Central journal article supplement (PMC3471859; doi:10.1371/journal.pone.0047624), 2012-10-15
Supplement: pone.0047624.s002.pdf [file pone.0047624.s002.pdf]

**Fig. S2.** Alignments of *P. infestans* gene with *H. arabidopsidis* genomic DNA containing remnants using LALIGN.

---

PITG\_14226

Waterman-Eggert score: 126; 33.2 bits; E(1) < 2.3e-05  
56.9% identity (56.9% similar) in 144 nt overlap

```
      1400      1410      1420      1430      1440      1450      1460      1470
PINFES GGGACTCGAGCAATACGTGCGAGTCATCTGCGCTCTGCTCGATATTCCAGTGCACAAGAACGTCTACGAGTCGCTG-CAC
      : : : : : : : : : : : : : : : : : : : : : : : : : : : : : : : : : : : : : : : :
HYALO  GCGTCTTGAGCTATACGTGGAGCTCATGTAAGTACAGTATGC-ATGGCTGTGCTTCCGAGCATGGACGATAAACGGTCAC

      1480      1490      1500      1510      1520      1530
PINFES GTGCTCTTCACCC----TGTACCTTGAGTTCAGTAGTAACCAGCATTTTATGCCTCTATTGTAA
      : : : : : : : : : : : : : : : : : : : : : : : : : : : : : : : : : :
HYALO  ATGTTTTTTACTCACGTTGCACCTCGATTATGATAGTGATCGGCACTTCGTGTCTCCACCGTAA
```

---

PITG\_18065

Waterman-Eggert score: 283; 66.0 bits; E(1) < 1.8e-13  
58.8% identity (58.8% similar) in 311 nt overlap (155-458:447-742)

```
      160      170      180      190      200      210      220      230
PINFES TGGATTT-GACAGCTCCAGTTGTTGCTCTCGAATGGGACACTGAAGGCAGTACAC--TCGCCATTCTACAACAAGGGAGT
      : : : : : : : : : : : : : : : : : : : : : : : : : : : : : : : : : :
HYALO  TTGATGTAGACCTCTCCTCTATTTGTTCTCGATCGGTACACGGAGGGCAGTCCTTGGTCATCATCCTGCGCCAAAACAGT

      240      250      260      270      280      290      300      310
PINFES AGTGTTCGTCCCCCTA-TGGGATAACGGCACACGATCAACGTTGAGTCTTGACACGAATCTCAAGGACCCGACGTTTGCTC
      : : : : : : : : : : : : : : : : : : : : : : : : : : : : : : : : : :
HYALO  AACATCGTCTCATTGTGTGACAACGGGACC-----TGGATCTCGTCATGCATACCGGATATCCGT-GATCGCTC

      320      330      340      350      360      370      380      390
PINFES GGTGGTCCAAAGAGGGTTCGTTACTAGCAGTGGGGACTCAGAAGGGGAACCTCGTTCTCTACAGTAAAATCACTCGGAAG
      : : : : : : : : : : : : : : : : : : : : : : : : : : : : : : : : : :
HYALO  TATTTTTTCGAT-AGGGTTTGCTGCAAGCGACGAGGTGAGAGAAGAAGA-CATCCTGCTTTACGCTCAAGTCACGCGATCA
```

```
          400          410          420          430          440          450
PINFES CTCGTTCTGTGGTGGG-GAAAC--ACTCGCGTCGCATATTATGCGGATCTTGGAACGGAGACGACAAACT
      :: ::::  :: :: : :: : :::::  ::: :::: : : :::: ::::: ::::: : :
HYALO  CTAGTTCTAATGATGAGTGATGCGTACTCGCAAGGCA--TTATCTGCAGGTTGAAACGGTGACGACACAAT
```

gap.....

Waterman-Eggert score: 115; 29.0 bits; E(1) < 0.024  
58.6% identity (58.6% similar) in 128 nt overlap

```
          560          570          580          590          600          610          620          630
PINFES TTGGTCGCAAGAGAGGAGACTCCATAAAAGCAGCCGAGCAGTTGATTGCAATTGCACTGTCCAAGGCCATCATTCTCTTT
      : : ::::  :::: : ::: : ::::: ::: : : : : : : : : : : : : : : : : : : : : :
HYALO  TGGTTCGTCTGAGGCAATCCTCGACGTAAGTAGCAGAACACTGAACTGCGATCGCA-TGTCCAATGC-AACTTCCCGTTT
```

```
          640          650          660          670
PINFES AACTTGCAAGACCCTG----CCAACCCCGTGGA-ACTCACCTTCCAAA
      : : : : : : : : : : : : : : : : : : : : : :
HYALO  CATCTGAATGGTCATGATTCCCAATCCAGTTGTCAGTCGCCACTCAAA
```

---

PITG\_15414

Waterman-Eggert score: 138; 34.9 bits; E(1) < 0.00011  
64.3% identity (64.3% similar) in 84 nt overlap

```
          490          500          510          520          530          540          550          560
PINFES GGATGACAATTGCAGCCTATCAGACACTGTACGAGTCCAGTATCGCGTTTGGGATGCGTA-AAGCTCTCATGGCGGAGCA
      : :::: : : :::: : : ::::: : : : : : : : : : : : : : : : : : : : : : : :
HYALO  GTATGTCACGTGCGGCATATCAGACCCTGTATGCTTGTGGTATCGAGCAAGAGATACCCAGAAGTTATCAGGAGCGAACA
570
PINFES GAAG
      :::
HYALO  AAAG
```

---

PITG\_13461

Waterman-Eggert score: 231; 40.3 bits; E(1) < 1.2e-06  
59.2% identity (59.2% similar) in 211 nt overlap

```

          10          20          30          40          50          60          70          80
PINFES TACGACGACGTCTGCTTCTTCTTCGTGAGCTGCACCGTCTCACGTTTAAGAACGTGCAGTAAAGTCTGCGAGCTCTCGAG
      ::  ::::: :: : :: : ::  :: : :: :  ::  : ::::: :: :::: ::::: :::::
HYALO  TACATTGACGTCGGCAT--TCATTGTTTA-TGGATTGTGTTCCGG----GCACGTGCAGCAACGTCTGGAAGCTCTCGAT

          90          100          110          120          130          140          150          160
PINFES GATCTTCATGTAGGCAGCCTCTGTCTCCTGGATGGTACGGTTCGATTACATTACGAGCTTGTGTTTTCCCTA-GCGAGCGCT
      ::::: :: : :  : :  ::::: : ::::: :  : : ::  ::  : :  ::::: :  : :  : :
HYALO  GATCTTCATATCGGTGACTTCGATCTCCTAGTTGGTAAGACCATGTTTGTGTTTCACCTGCTTTTTTCATCTGCTGTCTCA

          170          180          190          200
PINFES TCGTTGATCTTGCTGAGTCTGTCGG--TGAGAATGGTCAAGTCTTTCTGGA
      :  :  :: : ::: : : : :  : : : :  :  : : : :  : : : :
HYALO  GCAAT--TCTCGCTGCATTTGTAGTCATTCGAAAGGAAAAG-----CTGGA

```

---

PITG\_4711

Waterman-Eggert score: 228; 36.1 bits; E(1) < 1.9e-05  
56.7% identity (56.7% similar) in 240 nt overlap

```

          190          200          210          220          230          240          250          260
PINFES TGTGGACGCGAAATGCCAAGGAAGTGTGATAGAATCTTGACGCGGTCCGACGCCTACAAAATGGGTAAACTT-TTTGA
      :  ::::  ::: :  :::::  : : :  ::: :  ::  : :  :  :  :  :  :  :  :  :  :  :  :  :
HYALO  TTTGGAACCGACAAGCCAAC-ATGTATCGCTTCAA-----AGAG-----CATCAATATGGCCACAGCTTGTTTTA

          270          280          290          300          310          320          330          340
PINFES TTCAGAGTTGAAGGAGGCCGAAGGCGAAATGCAAATTGTTAACGAGAACGTCAAGCCGACTGATGCGTCCTTCATCAAAT
      ::::: :: :  ::::: : : :  ::: :  ::: :  : :  :  :  :  :  :  :  :  :  :  :  :  :
HYALO  C-----GTTGA-GGCGACCGACGACGGAACGCATGTTTTGAGCATCAAAGTCAAGCCACCGGACGCATCGTTCGTCAGCG

          350          360          370          380          390          400          410
PINFES TCAAAATCGTCTCCGGCTGGGACGACTTTGTGGTTCGTGCATCGGATCAGCGTGGAAGGCTCGAGCGCTC-----GAAGA
      :  ::::: :: :  ::::: : : :  : : :  : : :  : :  :  :  :  :  :  :  :  :  :  :  :
HYALO  T--AAATCCTCGC-GGCTGGAACGA-----GTGCTTCAGGTCAGTGTAAAACACTAGACAGCCCTGCAGTGAAGA

```

PITG\_1067

Waterman-Eggert score: 144; 34.9 bits; E(1) < 0.00018  
57.4% identity (57.4% similar) in 237 nt overlap

```

      890      900      910      920      930      940      950      960
PINFES GACGATAGCTA-GATTGCTCTCGTTCTCGAGGAGATCCAATGGCACCGCTGAGTGCAGTACGATCATTTGGATGC-TCAC
      :: : ::::: :: :: :: : ::: :: :: ::::: ::: :: ::::: ::: ::: : :
HYALO  GAGGTCAGCTAAGAATGG-CTAGCTCTACAGTAGTTCCAATGGTACC--AGAACGCAGCACGGCCATTTTCATGGATTGC

      970      980      990      1000     1010     1020     1030     1040
PINFES GGGGATTTCTAGCGACACGTCATAAGCTGCCAACGCCGCTTCAGTTGGAACCTTGCTGTTGACCACCAGGTCTTCCGCCA
      ::  ::: ::::: ::
HYALO  AGGAGCTTCAAGCGAC--GT-----ATCGTCG-GACCACATGGAA-TTTTTATCCGCCACTCAGTCGACTGCAC

      1050     1060     1070     1080     1090     1100     1110
PINFES CTGGGAGATGTTTCCTTGCTCTGGCACCTCGCTGTAGACTCAATCGCGGATCTTG-TCCTCAAGAGCGGCGACCTC
      :  :::  ::  :: :  :: ::: :  :: :  :  ::: :  :::  :::  :::  :::  :::  :::  :::  :::
HYALO  GTATAAGACAGTC--TGGTTTTGACACTT-GCAGCCAAGTTAAGAGCGCAAACCTTTATCCTTGAGGGTGGCTACCCC
```

gap....

Waterman-Eggert score: 119; 29.6 bits; E(1) < 0.0071  
59.8% identity (59.8% similar) in 199 nt overlap

```

     1460     1470     1480     1490     1500     1510     1520     1530
PINFES AGTGCGTACCATCGAAG--GTCAGTTTGGTCACGTAGAGGCTACGGTGGTGGCCAACACGC-AGCCTCGGTTCGGCGCAA
      :::  :: :  :: ::::: :  :: ::::: :::::  :::::  :  :  :  :::  :::::  :  :  :::  :::
HYALO  AGTCAGT-CAATAGAAGACGCCAAGTTGG--ACGT---GGCTCAGATCATAGCGAGTGCGGTAGCCAC---CAGCACAAAC

     1540     1550     1560     1570     1580     1590     1600     1610
PINFES -CTATCAAGTTTTACGTCAAGCCTCTGTCACTGCATCACCGCGTCAACGAACCTTACGGAAGCGGAAGAAGCTGAGCTGCA
      :  :::::  :::::  :  :::  :::  :  :  :  :::  :::  :::  :::  :::  :::  :::  :::  :::
HYALO  GCGGTCAAGTGA-ACGTCTGTCTCTCAA-GAAGAAGCGC-TCGACGGACGTT--GAAGCAGAAGGAGCTGTACAGGA
```



```

        6540      6550      6560      6570      6580      6590      6600      6610
PINFES GTGCAGACTGGAAACGCCCGATACGACAGCACGGCAGCAGA-TGACGCGCAACTGAGTTTTGGACAGCGCGAAGCTCGTC
      : : : : : : : : : : : : : : : : : : : : : : : : : : : : : : : : : : : : : : : : : : :
HYALO  ATGCAG-CTGCAG-----CGTCTGTATAGCAGCATAGTGATGCG---TTCAGTATTGGGAAGCACGAA-CTTAAT

        6620      6630      6640      6650      6660      6670
PINFES GCTGAGTCGTAGAACGCGCGCCAAAATGCCTCAATTTTCACG-AAGACGTAAGTTGTCTGAAGGGGAGAATG
      : : : : : : : : : : : : : : : : : : : : : : : : : : : : : : : : : : : : : : : : : : :
HYALO  GCAGAATTGTACAAAATA-GCTAGAAGTTTTTCGGTCTCATGCAAGCTGAAGGTAGTGGATGGCACGAAAG

```

---

PITG\_4600

Waterman-Eggert score: 240; 57.8 bits; E(1) < 2.4e-11  
58.5% identity (58.5% similar) in 342 nt overlap

```

        830      840      850      860      870      880      890      900
PINFES CGCATATTGGTGTCCATACAGAGTCTCCACGACCGTTTATGATAGTTGCGATCACGTCGAACAAGTAATGCCAAGTGAGT
      : : : : : : : : : : : : : : : : : : : : : : : : : : : : : : : : : : : : : : : : : : :
HYALO  CGCAGATTGGCGTCCACGCACAATCCCCACG-CCGGTTAC-ACGGTCACGATTG-GTTGA-CAAGCGATGCCAAATGAGT

        910      920      930      940      950      960
PINFES CAAACGCAATG-----TAC-TGAAGCTCACGGAGTTGATTTCTTCTCGGTAGACGACGTCGGTCACACCTTCTTC
      : : : : : : : : : : : : : : : : : : : : : : : : : : : : : : : : : : : : : : : : : : :
HYALO  GGATGTCAATGCGGATGTCAATAGATGAATGTTGCGTAACTGGTTTTAGCTTGTAACATAGCGTTG-TCACGCCCCCTT

        970      980      990      1000      1010      1020      1030      1040
PINFES TTCCCAACGCATTTCGTGTAGCATCCCACCAGCCAATCCGAGGAAGTTCAGCACTTCCAGCACGGATGCATGTCGTGGAG
      : : : : : : : : : : : : : : : : : : : : : : : : : : : : : : : : : : : : : : : : : : :
HYALO  TGTCCAAAGTCT-CGCATAGCCATCCCCGACAGATCT--GGCTCTTC-GAACGTGACGCCGTTTTCCATCGCCTCCG-G

        1050      1060      1070      1080      1090      1100      1110      1120
PINFES CATA--CAGCACGTCCTTGGGCAATGTGAGACTAGCTTTGATCGGTAAAGCAGCAGAAACGACCATCCCATCCAAAGGAT
      : : : : : : : : : : : : : : : : : : : : : : : : : : : : : : : : : : : : : : : : : : :
HYALO  TATAATCAGCATGTCGTTG-CATTGTGAGA-TAGTTTCGATC-----GCTGCATATGCTACCTTCT-----AT

```







```

930      940      950      960      970      980      990      1000
PINFES GGCTTTTACTTCGGGAATCTTGAGTCCGGAGAAGCGAGGATTCATTGCAAATAGCTCCGTGTGTGCGTTTCTGTAGCGGAC
      ::      : : :: : : :: : : :: : : :: : : :: : : :: : : :: : : :: : :
HYALO  TGC-----ACCGAAAT-TCGCGTCGGG-GAACC----ATCGGCTGGAAA-AGCACCA----GCGTTCCTGGAGTGGGC

      1010      1020      1030      1040      1050      1060      1070      1080
PINFES CCAGCATTCTTCTGGATCAAGTACAGTTGATCAATTTTCGCTTTCCCCGGGAACATCGGCT-GCCCCCAATAAGC---TC
      :::: : :: : : :: : :::: : ::::: : ::::: : : : : : : : : : : : : : : : : : : :
HYALO  TG-GCATCTCCTGTACCAAATACAGCTGATCAGTTTCGCTCTTTTCA--AAAGCTCAGATTGATCTTCGACATGCAACTC

      1090      1100      1110      1120      1130      1140
PINFES ACCCATAATGCACCCGATTG--CCCAGACATCCACAGATTTAGAGTACGTGGTATCCCCAAG
      :: : : : : : : : : : : : : : : : : : : : : : : : : : : : :
HYALO  TCCTGGACTGAACATGTGTCACACCCACGTATCCACA-ATCTTGAGTTGCTGATATCGACAAG

```

---

PITG\_6195

Waterman-Eggert score: 202; 48.6 bits; E(1) < 1.3e-08  
60.0% identity (60.0% similar) in 170 nt overlap

```

      1160      1170      1180      1190      1200      1210      1220      1230
PINFES CTACATGGCGTGTTTATTCGACAAGGAGAGCATGACAAAAAATGATCTACGCG-ATAATAACAATGCCACCACGTGCGGT
      :: :: : : : : :: : : : : : : : : : : : : : : : : : : : : : : : : : : : :
HYALO  CTGCACGACAGTTACCTGTCCGACGTGACCAT--CTGACTACGATCTCCACGCAAAACAACATTGTAACAACCTTCGCAT

      1240      1250      1260      1270      1280      1290      1300
PINFES CAAGGATCAAGTCGTGTGGCTCTGTATCGAGCTACTGGACTCACGTACGTGT-ATACCATTGAATGTA ACTACAACGAAG
      : : : : : : : : : : : : : : : : : : : : : : : : : : : : : : : : : :
HYALO  CGAGAATGTAGTTGCACAGCATTGTATCATGCTACAGAACTGATGTATGAGGCACAAACTTGAGTGTACTTGCAGCAAAG

      1310
PINFES GTCGGCGTAA
      : : : : :
HYALO  ATTTCCGTAA

```

gap....

Waterman-Eggert score: 105; 26.8 bits; E(1) < 0.045

54.5% identity (54.5% similar) in 222 nt overlap

```
                240      250      260      270      280      290      300
PINFES CTGGTTCTACTTTGAGGTAGAACGGACTCTTAAGGCCGCCAAA-CAACCGCAAGATCTGCACGTGACATTGGTGAATCTG
      : : : : : : : : : : : : : : : : : : : : : : : : : : : : : : : : : : : : : : : : : : : : :
HYALO  CTGGATCTACTCAACCTTATTGTGGACTCGTACTGCTTCAAAAACAA--GAACGTGGATCACATGAACTTTTTGAAGCTC

      310      320      330      340      350      360      370      380
PINFES AATCCACAGCG--AGGACTATTCAAAAATGGCT-----ACAC--GATCATGCACAGCTCGGACGAGGAACGATGGGACCG
      : : : : : : : : : : : : : : : : : : : : : : : : : : : : : : : : : : : : : : : : : : :
HYALO  AACTGAAGCGCAAGTTCGATGCAGCCACCGCGGCCAACGCCGGATGATCGACTTATTGGACAATGTGTGGTGGGAGCA

                390      400      410      420      430
PINFES G----TTGCCTTC-ACCGCTGATGAAAATTCGACTGTCGCTCAGCTACAAATTCAAATTTGC
      : : : : : : : : : : : : : : : : : : : : : : : : : : : : : : : : : : : : : : : : : : :
HYALO  GCTCTTTGGTTTCCACCTCTTTTTTCAGATTCAA--TCGCTCCATGTCTGAAGGGATATGTGC
```

---

PITG\_16089

Waterman-Eggert score: 295; 68.3 bits; E(1) < 9.9e-15

58.9% identity (58.9% similar) in 338 nt overlap

```
                10      20      30      40      50      60      70
PINFES TCAGCCAGTTGAGTCCATGAGGTCGAGCAGGTCGTCGCCTCCTCCTTTACCTTCGCGTTTGGTCTCGTC-----CATCT
      : : : : : : : : : : : : : : : : : : : : : : : : : : : : : : : : : : : : : : : : : : :
HYALO  TGAGCGCGTTGAGTCCACGAA---ACCAAGTAGACAACGGCGCTACTGCGTCCGTGTGTGGCGCCGTTGTCTAGTCATCT

      80      90      100      110      120      130      140      150
PINFES TGAAGTCTTGCAGTATCGCATCAGTCGAAGTCTTGCGGTCACTCGCAGCGTCAATCCAAATCGTAGGAA----CTTCTTT
      : : : : : : : : : : : : : : : : : : : : : : : : : : : : : : : : : : : : : : : : : : :
HYALO  TGAAGCCCTACTGTATCGCGTTGGTGAAAGT-TTGCAGTCGCTCGCA-CGTCGATCGAAT--GGAGAAATCTACCTGTTG
```

```

                160      170      180      190      200      210      220
PINFES ATCGTCGTCGTCATCTCCACCAGATCCAGGCTTCG-TGGGGTCGTC-TGGGAACAGGTTGATACGCAACGCCTTGTTGTC
      : : : : : : : : : : : : : : : : : : : : : : : : : : : : : : : : : : : : : : : : : : : : : : : : : : :
HYALO  CTTGCCCTCTTTGTCTCTTTG-GACCCCGTATTTCGGTCGAGTTACCATGGG--CAAGTCGGTT-GCAACGCTTCGTTGTC

                230      240      250      260      270      280      290      300
PINFES CCCTTCGACATCCTTCGCGGACGAAGATTTCCCCACAAGATCAGCGAGCAGGTTGAGTCCATCCGCTGCGGTGGCTTTAA
      : : : : : : : : : : : : : : : : : : : : : : : : : : : : : : : : : : : : : : : : : : : : : : : : : : :
HYALO  TCTAGTGACATATTTTGTAGATGCTGACTGGCTTGCGGGTTATGTGAGCAGATTGAGTCTGGTGGCCGCTGCAGCTCTGT

                310      320
PINFES AAGTCTTTT--GGTGCTT
      : : : : : : : : : : : : : : : : : : : : : : : : : : : : : : : : : : : : : : : : : : : : : : : : : : :
HYALO  TGGTCGTTGACGTTGCTT

```

gap....

Waterman-Eggert score: 177; 42.5 bits; E(1) < 5.7e-07  
62.0% identity (62.0% similar) in 150 nt overlap

```

                500      510      520      530      540      550      560
PINFES GGTCTTCGGGCGCTTCAACAGATCCCTCCGCACTGGCAATAGCGAACGTTTTTTCTTCCTCAACACGGTTC-GACGCGT
      : : : : : : : : : : : : : : : : : : : : : : : : : : : : : : : : : : : : : : : : : : : : : : : : : : :
HYALO  GGCCCTTTGAT-GCTTCAACGGA-CCCTTCAGACTGACAATTA-GACC---TTGTCTTTATTGACCCTGAGCTGATGCGT

                570      580      590      600      610      620      630
PINFES CAAAGTAGCGAATTCTACCCGGCACTTTGCCGCCTGTAGCCGTGAAGCCTTCGTAGTGAATGGCCAGCGT
      : : : : : : : : : : : : : : : : : : : : : : : : : : : : : : : : : : : : : : : : : : : : : : : : : : :
HYALO  CAGAACTGCTACGGTTTTCTGGCCACTTACTGCTAGTCGCCGTGAAGCCTTCGTTGTTGACGATCACTGT

```

---

PITG\_12109

Waterman-Eggert score: 195; 46.7 bits; E(1) < 1.9e-08  
58.8% identity (58.8% similar) in 216 nt overlap

```

                450      460      470      480      490      500      510
PINFES CGCAACCGCCTGACAACAAGCGCAGACTTACTAGAGCTCTCTCAATGTCCGC-----TGCTGAACAACATCGATATCA
      : : : : : : : : : : : : : : : : : : : : : : : : : : : : : : : : : : : : : : : : : : : : : : : : : : :
HYALO  CACAATC-CCTTACTAAAAGCTCG--CTTGCAAGAGCTGGCACATTTTCCGGACTTGCATACTCAACAACAACAACATCA

```

```
          520          530          540          550          560          570          580          590
PINFES GCCACAACCTAA-TCGAGGACCCAGATATATTGAACGTGCTCAAAGCGGTGCCAATGCTCAAGGCGCTACGAATCACAGG
      :::      : : : : : : : : : : : : : : : : : : : : : : : : : : : : : : : : : : : :
HYALO GCCTGCGTCAAAGTCAAAGTCACGG---TGTCAAGCGTGCTCAAGT--TTTCCATTAAAAAAGCACTGCCGATCAGCGG
```

```
          600          610          620          630          640
PINFES CAACCCAGTGGTCTCCAGCACGCGCTCGTTTCGAAAGACGTACATTGCAGCTCTAC
      :::      : : : : : : : : : : : : : : : : : : : : : : : : : : : : : : : : : : : :
HYALO CAATATAGTGGTCTGCAA-AGACACCCTTTCCCGATATATAGGTTGCAGCTATTC
```

---

PITG\_14588

Waterman-Eggert score: 159; 38.2 bits; E(1) < 5.7e-06  
63.6% identity (63.6% similar) in 99 nt overlap

```
          390          400          410          420          430          440          450          460
PINFES AGGCTGCTCGATACGGGAGGTGCCGCTGTTTCGGCCAATGTCTTCGTCACGAATGCAGCAGTTTATAGCGTGGCTAACGG
      :::: : : : : : : : : : : : : : : : : : : : : : : : : : : : : : : : : : : : : : : :
HYALO AGGC-GCACAATGCACAAAGCGCTGCTGTTTCGTGGGACGTTTTTCATCATAGATACAGCAGTTTGTGACCGGGCCTCCGG
```

```
          470          480
PINFES GATCACCGCCCGAGTATTT
      : : : : : : : : : : : : : : : : : : : : : : : : : : : : : : : : : : : :
HYALO GCTAATCGCCTGGATATGT
```

---

PITG\_8015

Waterman-Eggert score: 278; 66.6 bits; E(1) < 3e-14  
55.6% identity (55.6% similar) in 478 nt overlap

```
          80          90          100          110          120          130          140          150
PINFES TGCTGCCGCGCACGATCGATATTTGGTTCAGGGAATTGGCTGGATGACTCTT--CTGCGTCTTTATCGTCTTGCTCGCCT
      : : : : : : : : : : : : : : : : : : : : : : : : : : : : : : : : : : : :
HYALO TGTTTGCGGGTACGATCGATGTTCCGATCATGTGTTGGATTATGGGACTATTTCCGAGGTTGGTGTGTCGTGTTTCGC-T
```

```

          160          170          180          190          200          210          220
PINFES CCTTCCTTCT-----GCGTAAGTAGGCTTTCAGCTATATCAACTGATGGAGA-ATAGTATTCGCTTGAGATTTTAATCCA
      :  :  ::::      :  ::  :  :  :  :::::  :  ::  :  :  ::::  :  :  :  :  :  :
HYALO  CAATTTTTCTTACCCGAGTTAGCAAGTTTTTCAGTTGCATTG-CCGACTGAGACATAGTCCACTCACAAACTTGGTTTACC

          230          240          250          260          270          280          290          300
PINFES TTGCCGTGCTTTTCTC-TTCGTGCT-GATCTTTCCCGAATCGGTC-TTGGCGCCACGCAGCGCTCTTTGGAACACCGATAT
      :  :  :::::  :  ::  :  :  :  :  :  :  :  :  :  :  :  :  :  :  :  :  :
HYALO  GTCGTATACTTTCTCCTTTGTGCTAGGTCTGTACGG---CGGTAATTCAGGCCAAGCTGAGCGTTTTAGCATGCGCAAGA

          310          320          330          340          350          360          370
PINFES CCTCGAAAAGA----TCAGCTCC----AGCAGGTACGAAA--AGCGGTTTGGCTGGGTCGACTTCTTTACTGGCACCTCG
      :::  :  ::  :  :  :  :  :  :  :  :  :  :  :  :  :  :  :  :  :  :
HYALO  CCTTTACAAGCGGGCTCGGGTCTGCAAATCTGATGCAAAAGTAGCAGATTTACATAACCGACCTCTATGCAAATGCTACG

          380          390          400          410          420          430          440          450
PINFES AGCCATAGCTCGGAATGCAAAGCCTTTCATGACGGACCGAAATTGCGTGACA-AGGTTCTTGTCTTCATACTGGTAAAC
      :::  :  ::  :  :  :  :  :  :  :  :  :  :  :  :  :  :  :  :  :  :
HYALO  AGCGTTGCACGGATTACGAATCAGTCCGTTACG--CCACAATTT-GTGCCGTAAGATGATGTCCTTCATATGGATGGAT

          460          470          480          490          500          510          520
PINFES AAGACGCTGGCCCCGTACATATGTGAGAGATACCTTACTGCCTGAGTCACTCCTTTGCGCTTGATTGAGTCCTCGTCT
      :  :::  ::::  :  :  ::  :  :  :  :  :  :  :  :  :  :  :  :  :  :  :
HYALO  TATACGTTGGCGCGATGCAGCTGTGAGA--TGCTCTACGGC-TCGGACAAACAGATGCTGCAGTTTTAGGCTTGGTCT

```

gap...

Waterman-Eggert score: 167; 41.3 bits; E(1) < 1.3e-06

63.7% identity (63.7% similar) in 124 nt overlap

```

          920          930          940          950          960          970          980          990
PINFES GCTGTGGTTGGTTTGGATCTCCTCGGCTTTGGACGAATTCGGAAATTGGCTGTGAGAGAGGTTTTACCTGATCCGCGAGG
      ::  ::  :  :  :  :  :  :  :  :  :  :  :  :  :  :  :  :  :  :
HYALO  GCAGTTTTAGGCTTGGTCTGTTCAGCTGTGACCAAATTCCTGAACCTG-CAATAAGAGCGGTTT-ACTTGAGCCACTTCG

```

```
      1000      1010      1020      1030
PINFES ACCGACAATCAGCGTGAAGG--TGTCACGTTCCCTCCGGTGCTGG
      ::  :::  ::   :  ::  :  ::  :  ::  :  ::  :  ::  :  ::  :  ::  :  ::  :
HYALO  ACTAACA-TCTTAGGCAATGATTGCCTCATTCCCTTTGGTGCTTG
```

---

PITG\_3878

Waterman-Eggert score: 283; 65.3 bits; E(1) < 1.7e-13  
59.0% identity (59.0% similar) in 290 nt overlap

```
      440      450      460      470      480      490      500      510
PINFES GGCTCCGGTAGATTATGATCCCATAGCTTCACGGTCCAATCGGCGCTACAAGACAGGAATGCTCGCTCGTGGGAAGGGATT
      ::  ::  :  :  ::  ::  ::  ::  ::  ::  ::  ::  ::  ::  ::  ::  ::  ::  ::  ::  ::  ::  ::  ::  ::
HYALO  GGATCGAGCACATTATGACTCCATGGCTTCACAG-CCAGTCAGCGTCACA-GATTATAAAATCCGCTCGTGGGAATAGA--

      520      530      540      550      560      570      580      590
PINFES CCAGCGCACAGCATACACTGCCATGTGGTGCCCTGCATACGTCTCGAGATACTGTCCAGAGTACGCTTTTCGAGCACTTGT
      ::  ::  :  :  ::  ::  ::  ::  ::  ::  ::  ::  ::  ::  ::  ::  ::  ::  ::  ::  ::  ::  ::  ::  ::
HYALO  CCAGTGC GCGACATGCACTGTTATGCGATGATCTGCTGCTGGCTTACAACATTCCAAAGAGCATGCTTTTGAACACATCC

      600      610      620      630      640      650      660      670
PINFES GAAGCTTGCCTTCCCTCCGTACCGACAATGAAAAGGTGCTCACTGAAGCGGTTAAAGTCAAACAACATCCACCTGCAAGA
      :  ::  ::  ::  :  ::  :  ::  :  ::  :  ::  :  ::  :  ::  :  ::  :  ::  :  ::  :  ::  :  ::  :
HYALO  CCGGTTTCTCTTCTTTTCGTGC-----TGAA---CTGCTTGCTCAA-CAAT--AAGCGATCCCAGCAGTCAATTGT----

      680      690      700      710      720
PINFES CCAGATAAGGACGCTTCTTCAGGATCGTCCTTGGCCGCTGCGACTAGCTT
      ::  ::  ::  :  ::  ::  ::  :  :  ::  ::  ::  :  ::  ::  ::  :  ::  ::  ::  :  ::  ::  ::  :
HYALO  ---GATAAAGATGCCACTTCATGATCACTCCTAGCCGCTGCCGCATGCTT
```

---

PITG\_7793

Waterman-Eggert score: 170; 43.9 bits; E(1) < 8.8e-08  
58.2% identity (58.2% similar) in 196 nt overlap

```
      150      160      170      180      190      200      210
PINFES GAGCTCGAGGGCAAAGAGTTTAAACGAGAGCGACTGCAAGGGC--TGGAGCATCGCTATCGCCGACGCC--GTCAAAGCTC
      ::  ::  ::  :  ::  ::  :  :  ::  ::  ::  ::  ::  ::  ::  ::  ::  ::  ::  ::  ::  ::  ::  ::
HYALO  GAGGTCTTGCGGTTGGAGTTTGAAGGCAGTGAGAGCAAAGGACTTGAAGCGGTGCGACTGCAGACGCTCGGTTAGGGCT-
```

```

-220      230      240      250      260      270      280      290
PINFES GCATCCACACTGATTGTAGCTTCCCACGCTACAAGATCGTCGTACAGACGTTTCATCGGCCAGCAGAGACTGCAGGACGTC
: : : : : : : : : : : : : : : : : : : : : : : : : : : : : : : : : : : : : : : : : : : : : : :
HYALO GAATTCATATAGAGCCAGGGTCCCACAACAGAAGGTTGTCCTGCGGACATCTACTAACCAGCTGATACCGTCT-ACGTC

300      310      320      330
PINFES CGTATCACGTCTCGCTGTTTGTGGGACGACGATCAT
: : : : : : : : : : : : : : : : : : : : : : : : : : : : : : : : : : : : : : : : : : : : : : :
HYALO -GTATACCATCTCATCACTTGTACGATCACG-TCAT

```

---

PITG\_20902

Waterman-Eggert score: 261; 56.0 bits; E(3501) < 3.5e-08  
56.5% identity (56.5% similar) in 462 nt overlap

```

170      180      190      200      210      220      230      24
PINFES GAGGTGTCTGCGTTACTGAACGAGAAAGGAATCAAAATGACTCGTGAGGAGATCGAGGACGAG--CTTCGTATAATCAAC
: : : : : : : : : : : : : : : : : : : : : : : : : : : : : : : : : : : : : : : : : : : : : : :
HYALO GACGAGTTTGCCTGCTGAACAAGTC--GAAACTATGTGCCACGTGAACCGATTGAAGACGAGGTCTGCGAACGGGCG-C

250      260      270      280      290      300      310      320
PINFES CAGAGTCTAGAGAAAGCCGTAGTCAATCGCTCTGTGGTGCAGAATAGCAACGCCACAGTCGTGTGATCAAGAACGAAGA
: : : : : : : : : : : : : : : : : : : : : : : : : : : : : : : : : : : : : : : : : : : : : : :
HYALO CAGC-TCAACAGAATGC--TTCAAAAACCAAAGCAGTGCAGAACAGTAGCAGCCACAGCCGGATGGTCATAAACGAAG-

330      340      350      360      370      380      390      400
PINFES CCTATACGAGGCTATCAAGGCTCTGGGCAAAGTATGCTCGAAGAAGGAGGTCAGTGATATGATCTGGGAGGCCGACGAGA
: : : : : : : : : : : : : : : : : : : : : : : : : : : : : : : : : : : : : : : : : : : : : : :
HYALO --TATTGCAAGGTGTCAC----CCCGGC---GTTTG-TCGAA-ATCAAGATCAGCGATGTGATTGAAGAGGTAGACGGTA

410      420      430      440      450      460      470      480
PINFES ATCTGGACGGTGTAAATCGACTGGGAGGAACTGCGCGCCATGTTCAATCGCAACCTGCTGGACAAGACGGAGCTGGAGCCA
: : : : : : : : : : : : : : : : : : : : : : : : : : : : : : : : : : : : : : : : : : : : : : :
HYALO CCCTGG-----GTA-----GGAAGAGCTGCGTGTCTGTTTCAATGTACGATGCTCGACCA-ACCTACTTGGCGCCG

```

```

      490          500          510          520          530          540          550
PINFES  GCCAATCT-----CTTCAAC--GTCGTCCAGTT-CATGACGTACGACAAGAAAACTGTGGAGTCATCACTGCAGACGAC
      :: ::          ::: : : : : : : : : : : : : : : : : : : : : : : : : : : : : : :
HYALO  TACATTCATCGCGCTTAAGCCAGCACTCAAACCACAGCATGTACTCCACCTGAAACTTTAGAGTC----CTGGAGGCATC

      560          570          580          590          600          610
PINFES  ACTATGGCCATCCTCTTTGCGCGCTACGGCCAGT-CGCAGCTCGAGATGCGCATGAAGCAGC
      :::: : : : : : : : : : : : : : : : : : : : : : : : : : : : : :
HYALO  GACATGGT-ATCATCTT---GCATTATGATCAGTACGTACGTATACGTATGTGTGACGCTGC

```

---

PITG\_1312

Waterman-Eggert score: 216; 28.2 bits; E(1) < 0.018  
54.7% identity (54.7% similar) in 384 nt overlap

```

      940          950          960          970          980          990          1000          1010
PINFES  CTAGATCTCCGACTAAATCGCCTCACCGACGATGGGGGGCGCGTGT-TGCTGGAAGGCCTGGTGGAT-CATACGTCGCTG
      :: : : : : : : : : : : : : : : : : : : : : : : : : : : : : : :
HYALO  CTTGGTCGCTGATGGAATCGCGTAAGGGATGAAGGGAGGTAA-TGTCTCCTGTACGGCTTTGTGAAGACCCAC-TCACTA

      1020          1030          1040          1050          1060          1070          1080          1090
PINFES  ACCAGTCTGAACTTGAGCAGCAACATG-TTGGGCACGAAAGTGCTGAGGCGTTGGCTGAAATCCTCAGTGATTCACCGA
      : : : : : : : : : : : : : : : : : : : : : : : : : : : : : :
HYALO  ATTGGTCTTCAATTGAGTCGCGACATGCTTTGTGA--GAAACTATCGAGGCGCTGGCTGAT-----ATGCAATAA

      1100          1110          1120          1130          1140          1150          1160
PINFES  CGGCACTCCGCTCTGTAGATCTGAGCAGTAACGCGATGAGTGAAAGCGAT---GGAGACGTGTTGCTGCAGGGTTTGCAG
      :::: : : : : : : : : : : : : : : : : : : : : : : : : : : : :
HYALO  CGGCGCTTGGCTCAATTCAATGGCATATTAACTTATCTCCCTAAAGCGGTCTCGTAAAAAAGTCGCTACAAG-----CA-

      1170          1180          1190          1200          1210          1220          1230          1240
PINFES  CAGAATAA--CACGGTCATAGCGCTAGATCTGC-GCCAAAACACGCAGATCCCGGCTGATGCTGATTGCCTCGCTAAAAAT
      : : : : : : : : : : : : : : : : : : : : : : : : : : : : : :
HYALO  CGGAATATGTCACCATCATA----TACAGCTACCGCCATCAC---CATGTC---GCTCCTTCTTCGCTCCTTTCTTAA--

```



1250 1260 1270 1280 1290  
PINFES CGCCCAGAAAACCAG-ACAGAATGAGGTGAATA----TCAAGAACCCTTCCT----CCACAGCA  
: : :: : : :: : : : : : : : : : : : : : : : : : : : : : : : : : : : : :  
HYALO TGGCGTGAGA-CCAGTACCGCATGCGTTAAGGAAACGTACACAACGCTATCTACAGCCACAGCA

---

PITG\_0627  
Waterman-Eggert score: 178; 27.3 bits; E(1) < 0.012  
54.4% identity (54.4% similar) in 250 nt overlap

100 110 120 130 140 150 160  
PINFES GCTTTTGGATCAACGTTGACGACTTTCTGTGCGGTTTGTTCCTTAAACAGTAGCCCAGTTTCAC---TGTCA-----GCG  
:: : : : : : : : : : : : : : : : : : : : : : : : : : : : : : : : : : : : : : : : : :  
HYALO GCCTTTCGTATTCAAATTGACGCTTATTTTCATTGCATATGTAACCTTAGAATCGTCTCGCAAATGACATAAAAGCA

170 180 190 200 210 220 230 240  
PINFES ATCACTTGAAATTTGGTGTGGAGTTAGA-AGTGGAACTCTGAGTCTCCCAATTGTAGTAGCTCAGATCCGAGGATTTTCG  
:: : : : : : : : : : : : : : : : : : : : : : : : : : : : : : : : : : : : : : : : : :  
HYALO ATCG--TGCAA-----TGTCAGCTAACGAGTAGAAAGC---GTTT-----GCT----TCCG---ATTTC

250 260 270 280 290 300 310 320  
PINFES GTAGCAGCTTCTTCTTTCGCTCGAAATATGGCTCGAACGGTTTCATTTTTCAGACGCAGCGGTAGTCGATATAGCCGCTA  
: : : : : : : : : : : : : : : : : : : : : : : : : : : : : : : : : : : : : : : : : :  
HYALO GCAGCAGTTTTTCCATGTGCGCGAACTACAGTTCGAACAGT-CGTTATGCAGGCGCAACACAAAACCTCATATATCCATAA

330  
PINFES ATCT--CTTG  
: : : : : : : : : : : : : : : : : : : : : : : : : : : : : : : : : : : : : : : : : :  
HYALO ATTTAACTTG

---

PITG\_3419  
Waterman-Eggert score: 396; 39.3 bits; E(1) < 2.4e-05  
51.9% identity (51.9% similar) in 1446 nt overlap

20 30 40 50 60 70 80  
PINFES CTGCTACGCTGGCTCAACCACGAGCTGGAGCTGTCTTCTCGTGT-----GACGGACGTGGAGTCGGACTTTTCCAGCGG  
: : : : : : : : : : : : : : : : : : : : : : : : : : : : : : : : : : : : : : : : : :  
HYALO CTGCTGCGCTGGCTCAACCATGAGCTGCGACCGTGCAGCGCACACCACAGAACCAATTGGGGGTGGACATTACCAGCAG

```

          90          100          110          120          130          140          150          160
PINFES CT--ACTTGCTTGGAGAGATCCTGCACCGTCTCAACCACCAGCACAACTTCGC--CGACTTCATGCGAAGCTCCAGCGC
:  ::      :  ::      :  ::      :  ::      :  ::      :  ::      :  ::      :  ::      :  ::
HYALO TTCCACCGATTTCGGCTCGGTTCTGTACCGGCTTAAC-----ACGTCGCGGCCATATTACACGCAGCTCCTTCGC

          170          180          190          200          210          220          230
PINFES CGACGCCAAAGTCGT---TAACTTCT-GCTTGCTGGAGCCGGCGCTGCACAACTTAACGTTAAGTTTGACGCCAATGTG
:  ::::  ::  ::  :  ::  :::  :  :  :::::  :  :  :  :  :  :::  ::  :  :  :  :::::
HYALO CAACGCTAAGATCCTCCCTACTCTCTCGACCGTTGGAGCCCATGAA-CGCGATCTCAACCGTACACTCGGCACCAATGCA

          240          250          260          270          280          290          300          310
PINFES GCC-GTCGCTATCATGAACGAGAAGAAAGATGCCGCCGCCAACCTGCTCTACCAAATCAAGATGGCCGCAGCCCGAGTCG
:::  ::  :  :::  ::::  :::::  :  :::  ::  ::  :::  :  :  :::  :  :  :::  :  :  :  :  :  :
HYALO GCCAGTGCCAATCGAGAAC-AGAAGACCGTTGCGATCG---ACGCACTCGATCGGATCGATAT-----CCTTTCT

          320          330          340          350          360          370          380
PINFES GGAGAGCTCCAAATGTTTCGACCAAATCGCTGGAGCGGACTG-GTATCATTCCTT-----TGCACAA--CAGACCCGTG
:  :  :  :  :  :  :::  :  :  :  :  :  :  :  :  :  :  :  :  :  :  :  :  :  :  :  :  :  :
HYALO GTTGTTTTACTGA-GCCTCGCTCCAGT-GCCGAAACGTCCTCTGTGCCTTTTCTTCTGTTCTGAACCATTTCGATCACGTG

          390          400          410          420          430          440          450          460
PINFES AAACTTGCGAAGCCAATCTACGACTCAGAAAAGCACAAGC-TGTTTGAGCACTCGATTTCGTCGCCATGTGCGGTTCGAGCA
:::  :  :  :  :  :  :  :  :  :  :  :  :  :  :  :  :  :  :  :  :  :  :  :  :  :  :
HYALO ---CTTCCTT---CATTGTTA---TCAGAAGAACGTATGCGTCGTTGA-CACCCGCA-----CATTGAG-TAGAT-A

          470          480          490          500          510          520          530          540
PINFES CTTTCGTTGCAGCAAGAAAAGTGGACGAAGAAACGAGAGGCT-TATCTGGCGAGCATGGCG--GAGCAGAGAGAGATC---
::  :::::  :  :  :  :  :  :::  ::  :  :::  :::  :  :  :  :  :  :  :  :  :  :  :  :  :
HYALO CT--GTTGCATAGTGTCCATTTCGA--AAGA--CGTGTGGCACTATATCAT-ACAAAGGCGAAGAGAAATACATAAATCGAA

          550          560          570          580          590          600          610
PINFES --CTGGACAATA---CAAAGCAGAGAGACTGCACCGCGCA-TACATCCATA-GCAGCTATATTAAGAAGCTTTTCGAAG
:  :::  :  :  :  :  :  :::  :::  :  :  :  :  :  :  :  :  :  :  :  :  :  :  :  :
HYALO CTCGTGACCGTTTCTCTCACTACGAAAGACGGATCAGGAAAATAGATCCACGCGAATCTGAATGCATACACAGCTGGAAG

```

```

        620          630          640          650          660          670          680
PINFES AG----ACTGATTCGCCGGCATGGAGACTGGCACTG---CAGAAAAAGAATGCATGCGA--GCAGCGACGGGTTGCATTC
      ::      :::: :      : :::: : : :: ::      ::: : : : : :      ::: : : : : :      :: : :
HYALO  AGCGCTACTGCT-----CGTGGAAGCAAGCGCTATGTCAGGACAATAGT---TGCTACTGTACCAACTCTTTTTATCA

        690          700          710          720          730          740
PINFES TTACAGCAGCTGATGAAG--AAGCGCGAAG-----AAGCGGATGAGAATCTTACCTTCAGTCTTCGTCGTAA
      : : : :::: : : : : : : : : : : : : : : : : : : : : : : : : : : : : : : : : : : : : : : :
HYALO  TGAC-GCAGATGACACAGCAAAGCAAGATGCACAATTCTGTGCAAGCGGCTGAGCATTGATCGACCATC--CG-----A

        750          760          770          780          790          800          810          820
PINFES AGTTTGCAATGAGCTAGATGATTTTCGATGTACATCGATC----AAAGGCTG--GAATGGCGGGCAGCAAGGTTTCTTCAC
      ::: :::: : : : : : : : : : : : : : : : : : : : : : : : : : : : : : : : : : : : : : : :
HYALO  TGTTAGCAAC-ACCTACAAGG--CATGTATATCGTTGCAAGAAAGTATGAAGAAACTGAGTCTGGAATGTCCC GCC-C

        830          840          850          860          870          880          890
PINFES GGAAATCGGTTG-GATATGGTCTACGCTCACTTACAACAGCACTGAATGTATCGTCCGACAAGCA-GAAGT---ATTCAA
      :      : : : : : : : : : : : : : : : : : : : : : : : : : : : : : : : : : : : : : : : :
HYALO  GTGGTCTGTGCTGATTGTGGCTGCGGGACATAGAACAAGTCCGGACGCA-CGTGTG---CGCACGACGTCAA ACTCAA

        900          910          920          930          940          950          960
PINFES A---TGC-TCAC TTGGCGGGATCAG-CGATGAACGA---AGCGGAGCTTTATCAAGCA--AACATGTTGAAATGGAAGA
      :      ::: : : : : : : : : : : : : : : : : : : : : : : : : : : : : : : : : : : : : : : :
HYALO  ACGATGCGTTACTGG--TGAATCAGACGAGAAGCAACATATTGGAAAGTTA-CGAGCTGGAACATGCTTGATTTATTTTT

        970          980          990          1000          1010          1020          1030          1040
PINFES CG--CATCGGGCGTCATCAAGCAACAAAGGCTCTACGTGGAA-GACGCAAGGACAAATTGTCTCGCAGAAGGAAGCGGT
      :: : : : : : : : : : : : : : : : : : : : : : : : : : : : : : : : : : : : : : : : :
HYALO  CGTCCAGCTCCCTTCATCGAGCCGCGATCCCTTCGACGTCGATCGATGCTGAAACACTTTG-CTCGAAGC--GCTGGGTT

        1050          1060          1070          1080          1090          1100          1110
PINFES TTGTTCAAGATTGCGTGAATACG-CACT----CTCTAATAGGAACC-GCTCGTGTGGCGAGTATTTTGGAAAATCTGGTG
      ::: : : : : : : : : : : : : : : : : : : : : : : : : : : : : : : : : : : : : : : : :
HYALO  TTGCTCGAG-----GATAAGATGACAATTGGGCTACAACAGGAAAAAGCTTG-----ATAGTAT----GAGACTTTCCCT

```



```

      340      350      360      370      380      390      400      410
PINFES GCGGAAACTTTTGTCTGGGTGGCGTTT----TCAGGCGATAGCAAGTACTGCATCACGCAGGGAGGCGCAC--CAGACTG
      :::::  : : :  : : :: :  : : :  : : :  : : :  : : :  : : :  : : :  : : :
HYALO  TTGGAAA---TGGACATGAAGCCGCTAAGCGTC-GACGATC-CAAG-ACTC--TCA-GCAG--AAGCACTCTGCACACTC

      420      430      440      450      460      470      480
PINFES GGTGCTTTTCGCTCTGGTTGTGGGAGAAGACCAAGCTGC-----TCGCGAGCGTCAAAGCCTCAACGCCTCAAGGCAAC
      ::      : ::::  : :  : :  : : :  : : :  : : :  : : :  : : :  : : :  : : :
HYALO  GG-----GTTCTGAATATACGAGTGGACGGA-CTACGACACATTTTCGTGC--CATA----CAAGAGCTGA--GCAAC

      490      500      510      520      530      540
PINFES GTCATTCATCAGGCAGATTTTCAGTCCAAATGAACC---TCTAACGAT-----ATGTGCGAGTGGCAACGGAC---T
      :  :  :  : : :  : :  : : :  : : :  : : :  : : :  : : :  : : :  : : :
HYALO  GAGGTGTCT----AGAATCCAACACAAATCCACCGTGTCTGACCGCTGCACAGCGCATGTGCGTGAAGCAAAGGTCCAGT

      550      560      570      580      590      600      610
PINFES GCTAAAGTTCTTCCGATTCACAGACGGCCAGCTGAGATTACAGGC-----GACGC-CGCTGA-AGCGTGA----GC
      : : :  : : :  : : :  : : :  : : :  : : :  : : :  : : :  : : :  : : :
HYALO  GCGACA-TCATTTCTAGTCTCAGAAAG--ATCTGCTGGTACGGGATGCACAATGACTCTCGGTGACAGTCTCAAGTCTGC

      620      630      640      650      660      670      680      690
PINFES CCGCGCACTTCCTACGACATGCTTGGGTCTCG-GACGACCGCGTTGTAGCAGCAGCAGACTCAGGTGAACTGTG-GCTGT
      : : :  : : :  : : :  : : :  : : :  : : :  : : :  : : :  : : :  : : :
HYALO  ACTCACAAGACCTTCG-CA-GCT---GTCTCGAGTCAAGCG---GTAACAGCAGCAACCGCA-----ACAGTATGCCAG

      700      710      720      730      740      750      760
PINFES TCGAACAGTTTGA--GTTTAGACAG-ATCT-TGACGCCAGCGACTACTGGCGCAACGGGAGACGGCAGCTACGTGAGCTC
      : : :  :  :  : : :  : : :  : : :  : : :  : : :  : : :  : : :  : : :
HYALO  ACGATACCTGCCACGGTGTCAACTGCATTTCTCACTCTCGC-ATGACTTCTGAACGTCTC-CGTCA-CCAC--AAGTAC

      770      780      790      800      810      820      830
PINFES CTTGTTG-GGCTACTCCAAGGGCTTCGTTTGTGGCGGGTTCGGGAGGTTGTGTGCGCATT-----TACGACCGAAGC
      : : :  : : :  : : :  : : :  : : :  : : :  : : :  : : :  : : :  : : :
HYALO  CTTCTTGCGTTTCTTCTACA-CGTCTACTGTGCCGAG-CTGGA-----TGTGCGCTTTGCCCTTGTATAC-ATCGTTGC

```

```

      840          850          860          870          880          890          900
PINFES GAT--GACGGAGGAT-CGCG----CGAGTACTACAAAAAGGCCAAAAACGTTTCGAATCGA-----GGGTGATACTAGC
      :  :  ::  ::  ::  ::  :  :  :  :  :  :  :  :  :  :  :  :  :  :  :  :  :  :  :  :  :  :  :
HYALO  ACTCTGCCGCAGCATTTCGAGTCTGCAAGT--TTCAACAGTGACAAAAACGTAACGAATCAGTAATTCCGCGTG-TAC-AGC

      910          920          930          940          950          960
PINFES ACTATCAAGGACTTGGCTATCAGTCC----TAGTGAAG-ATCTGCTCG-----TTTGCTCCCTTGAGAA----CAACCA
      :  :  ::  ::  ::  :  :  :  :  :  :  :  :  :  :  :  :  :  :  :  :  :  :  :  :  :  :
HYALO  AGCTGCAAGGAGCTG--TACCAGACGCACGTATTGCTGCAAATGGTGGGAGATATTGATTCTGTCTGGGAATGTGCACGCA

      970          980          990          1000          1010          1020          1030          1040
PINFES TATGTACGCACTTACAC-TCTCAAGCACCGATATCCTCAAGGAAGACGCCATGAACTTCGAGGTCGTCTCGACGGCTTTC
      ::  :  ::  ::  :  :  :  :  :  :  :  :  :  :  :  :  :  :  :  :  :  :  :  :  :  :  :
HYALO  TA-GCACCGTCTTGCCCATGACAAACACC---TCGTCCAGCATCAC---AGTAGCTCCCTGTATGTATATACA-----

      1050          1060          1070          1080          1090          1100          1110
PINFES CATGCACCGAGTAGCAGTGGGAGCTGTCATATC-ACTGGACTTGACACG---TGCATTCG-TAAGCCGCT-----AGTGG
      ::  :  :  :  :  :  :  :  :  :  :  :  :  :  :  :  :  :  :  :  :  :  :  :  :  :  :
HYALO  CATGAATCGAATAGCAACA--AGTCGTCA-ATCTAATGAACTAG-CACGAGTTGCTTTCTATAAAAAGCATAACAAGTAG

      1120          1130          1140          1150          1160          1170          1180          1190
PINFES TGACTTGTG-CGCTC-GATCGATCTGTGCGCGTGTGGAATTACTTG-GACAAGTCAACTGATATCCTTAAATTCTTCCGC
      ::  :  :  :  :  :  :  :  :  :  :  :  :  :  :  :  :  :  :  :  :  :  :  :  :  :  :
HYALO  CTTCTCGAGACGTACAGTTGGCTTTGT-CTCGCAGGCATCTAAGAGCGTAAAGTCCA----TGTCATTGACGACCTCCTG

      1200          1210          1220          1230          1240          1250          1260
PINFES GAAGACGCTTTG-----TGTGTGG--CCTTCCATCCATCCGG-CTTGCA-CGTCGCTGTGGGCTTTA-CAG-ATAAGCT
      :  :  :  :  :  :  :  :  :  :  :  :  :  :  :  :  :  :  :  :  :  :  :  :  :  :
HYALO  CACCACACCTTCGATCACTGAGTCGTTCTTTAAGTCAATACGCACACGCAGCCCCACAAAGCTCTTGAGCAGCAGCAGCA

      1270          1280          1290          1300          1310          1320          1330          1340
PINFES ACGATTGCTCAACGTC-CTTATGGACGACATTTCGCTCTTGTCGTGAGTTTACTATCAAAGGCTGTTCGAGAGGTGCGTTTTC
      ::  :  :  :  :  :  :  :  :  :  :  :  :  :  :  :  :  :  :  :  :  :  :  :  :  :  :
HYALO  GCG-----ACCGTGGCTTACGG--GTC-TTCCCCCT--CCTTGGCTTGACCACCTC-GGAAGTCGTCACCTGCA----

```

```

          1350          1360          1370          1380          1390          1400
PINFES TCGAATGGAGGTCAGTTCTT---CGCCGCAGCAAACAACA--ACGTCGTCCATGTGTATGCCAC-----ATA--CACAG
      : : : : : : : : : : : : : : : : : : : : : : : : : : : : : : : : : :
HYALO  TCGAATCGTGCACAAATAGTGTACACCACACAAAACAACACTATTTTCATC-ACATAAAAACCACCCACCATCGTCCAC
```

```

         1410          1420          1430          1440          1450          1460          1470
PINFES GGGAGTTGGTGTCCGTGCTACG-----TG---GCCATTTCGAATCGCGT-----GACGGCGATTTTCATGGAAATCTGGC
      : : : : : : : : : : : : : : : : : : : : : : : : : : : : : : : : : :
HYALO  GA-AGTTCATGTCCACCACACGACATTCCTGTGCGCCATTG--ATGTCGTACTTAGACGGCC-TCCCATCG----CTTTC
```

```

          1480          1490          1500          1510          1520          1530          1540
PINFES GACCGAA--AGCTACTA--ACATGTGGAGCTGATGGTACAGTCCTC-CTCTGGAGTCTCCGTTTCAGCATCAA-AGCTGG
      : : : : : : : : : : : : : : : : : : : : : : : : : : : : : : : : : :
HYALO  GACTCACTTAACAACGACGACAA---AAGTTGACCCCTAACTTCTCGCTCGGT---TACATTTTCATCGCACAGTACT
```

```

         1550          1560          1570          1580          1590          1600          1610          1620
PINFES CGATGGCCACTCACAGGCACGTTGTTTCATACATTGATGC---CGCGCTATCTCCAGAAGGGG---ACGTGGCGTACGTA
      : : : : : : : : : : : : : : : : : : : : : : : : : : : : : : : : : :
HYALO  CGCTCGCTGCT-ATA-----TATATATAGAGTGAGACTAAACACATTATAACCAGTAACCCTCTACCTATC-TACCTA
```

```

          1630          1640          1650          1660          1670          1680          1690
PINFES ACAGGCTCTGATAATATGCTCAAGGAGATTGATACGGCTACGGGTTTGGCACGAAACGAGCTTTGGGTTCGGCG-GTAGTG
      : : : : : : : : : : : : : : : : : : : : : : : : : : : : : : : : : :
HYALO  TCTACCTATC--GATACACTCAAAGTCAT--ATAC--CTAC---CTACCTAC--AGCGAGCGATGGGTTCCTCGCGCGCG
```

```

         1700          1710          1720          1730          1740          1750
PINFES GGGCTGCATTAG---GCCATTAGCTC-----TCGCAAACCTCACAGC-----AAGTGCTTTTTGTTCGGA--
      : : : : : : : : : : : : : : : : : : : : : : : : : : : : : : : : : :
HYALO  GGACGGCGTCTGAACGACCAGGAGCGCATGGAGATCCTCGAGATCATCCAGCGCGAAGCCAAAGTGAAGAACGT-GGACC
```

```

         1760          1770          1780          1790          1800
PINFES TCGGCA-GAGCCAGGTCGTCCCGGTA---CGGT---GAGGCT-----ATACCGTTTGGCCAT-----
      : : : : : : : : : : : : : : : : : : : : : : : : : : : : : : : : : :
HYALO  TCGCCAAGCGCTACGGCGTGTTCGGAAGGCGGATCCGGAAGCTCAAGCAGATGCAAGACACGGTCCGCAATCGCTATTAC
```

```

1810      1820      1830      1840      1850      1860
PINFES -TCGAGAAAGACCAC--CCGCTAC-----CAACAACGACGTTGTTGAGTG----GTGGTGTA-----ACTACTTCTCCGG
: :  :: ::  :::  ::::  ::  ::::  ::  ::  ::  ::  ::  ::  ::  ::  ::  ::  ::  ::  ::  ::  ::  ::  ::
HYALO  ATGGGCAACGAGCACAACC GCGACAAGCGCAAGCGCGGCGGCTTCCAGCGCAACGCGCCGTTCGAAGAGGAGCTCTACCA

1870      1880      1890      1900      1910      1920      1930      1940
PINFES GATCTGTATCACCCACAGCCCAGACTGGATCTACGTTAGCTGCTGCTTCTGCAGGTACAG---GCTCAGCGTCC-CAGGC
:  ::  ::::  :  ::  :  ::  :  :  :  :  :  :  :  :  :  :  :  :  :  :  :  :  :  :  :  :  :  :  :
HYALO  G---TGGATCGTGCGCATGCGCGAGTCG--CAGCCGTACCAGCTCATGCCGCTCACACAGACGGCGGTGCGTCAACAGGC

1950      1960      1970      1980      1990      2000      2010
PINFES C-----TACACTGAGTACCATTGCCATGACCTCCCGGTGTCACGACT-TCGACTATCGTTCGACAACCAGTTCCTCTTT
:  :  :  ::  ::  ::  ::  ::  ::  ::  ::  ::  ::  ::  ::  ::  ::  ::  ::  ::  ::  ::  ::  ::  ::  ::
HYALO  CATTGTCTTGGCTAAGAACTAT-GACAAGATGGCCAATTTTAAGGCCTCTCCTGGCTGGTTTG---CGCGCTTCTGTTC

2020      2030      2040      2050      2060      2070
PINFES TCTACAGGCGAAGATGGATCG--TTGTGTATCTTCGAGACGCAAAA-----CGTCATCGG-----AAAAG-----
:  ::  ::::  :::::  :::::  :  :  ::  ::  ::  ::  ::  ::  ::  ::  ::  ::  ::  ::  ::  ::  ::  ::  ::
HYALO  GCGCCAT-CGA--CTGGATCCAATTGTGACCAATGGGGATGCTGCTGCAGCTGCGGCTGCGGCTAGTGTACAAGTGGCTG

2080      2090      2100      2110      2120      2130      2140
PINFES GAGGAAGCGTTGGT--GCTAGTAGCGGTCCAGGAGGTGGCACT---GTTGGGTCTCGAGAAGCTCGAAGTGATAGCAT-G
:::  :::  :::  :::  :  ::::  :  :  :  :  :  :  :  :  :  :  :  :  :  :  :  :  :  :  :  :  :  :
HYALO  GAGACAGCAGTGGGACGCTGGCGGCGGAC---GGCGTGTACCAGGGATGG--CTGCATCTGCT-GCAGTGGTACCGTGC

2150      2160      2170      2180      2190      2200      2210
PINFES ACACTTGGTGGCGGTGGTGCTAACGGCTCGGGTTTACCCTTTGCAG-AGGAAATT-----CTGGTTACCAAAT
::  :  :  :::  ::  :  :  :  :  :  :  :  :  :  :  :  :  :  :  :  :  :  :  :  :  :  :  :  :
HYALO  AC----GACGACGGCGG-----ACGATTCGG-TTTAC---TTGCTGGAGGCACTCACAGAGTCGTCGCCTGTGACGACGT

2220      2230      2240      2250      2260      2270      2280
PINFES CG-----GATCTAGA---AGAGAAGAATCGTCTTATGAACGAGCTGAAGTCCAAGGTGGACGAGTTGACGCTGCACAACG
::  ::  :::  :::  :  :  :  :  :  :  :  :  :  :  :  :  :  :  :  :  :  :  :  :  :  :  :  :
HYALO  CGCAGACGATGGAGATGGAGAGC-GCAGCGACT-----GCTGTGGTCTTGGGAGGAGCATCGGACGCAGAGCAAGG

```



2290 2300 2310 2320 2330 2340  
PINFES -AGTAT--CAG-----CTTCGATTAAGGATCTCAACTATAAG-----GAGAAGATCAAAGAGG-TATCCGACAAG  
::: : : : : : : : : : : : : : : : : : : : : : : : : : : : : : : : :  
HYALO GAGTAAAACAGGGACGCCGTTCGATCAATGAACAGGTGCAGCAAGCTGCTCGCGAGCATAACGAAGCGGCTTTGCGA----

2350 2360 2370 2380 2390 2400 2410 2420  
PINFES TTCACCGCTGAGCTAACGCAAGATCGACAACGCT---GTGGCGACTTGCAGAGTGACAAGACGGAAATGGAGAATGAGTA  
::: : : : : : : : : : : : : : : : : : : : : : : : : : : : : : : : :  
HYALO -----GCTGCCGTGGC-CAAGATTGGCGAAGCTCAAGTGTCGG--TGGAGATTATCAAGTCGAAAGAGGAGGAGGAG--

2430 2440 2450 2460 2470 2480 2490 2500  
PINFES CCAGAAGAAAATGCGCGAGATGGCTGCAACGCACCGAAGTGAGATACAAGAGCTGAAAACCACGTACGAAGCCAAAGTCG  
:: : : : : : : : : : : : : : : : : : : : : : : : : : : : : : : : :  
HYALO ---GAGGAAAAGG-----TGGACGTCAAG-----ATTGAGGTAGAGGACGAGACA-----GAAGAAGAAG--G

2510 2520 2530 2540 2550 2560 2570 2580  
PINFES AGGCTGAAAAAGCACGCTACGCAGCACTAGAACAGGCACGTGGTGAGCAGAACACTCGGTTTCGAGGAGGAAA---GTCA  
:: : : : : : : : : : : : : : : : : : : : : : : : : : : : : : : : :  
HYALO AGGG-----ACGGAAGGAAGCA--AGGACAGCGACGAGATGTTTCTAG--TCTTGGGA-CTATAGGGAATACTTGTCA

2590 2600 2610 2620 2630 2640  
PINFES -----TCTACTCGTTG-AGAGCCACACACAATTCTTAGCG---GAAA--TGACAACCGAGTACGAGCAAAAAG  
::: : : : : : : : : : : : : : : : : : : : : : : : : : : : : : : : :  
HYALO ATCATTTTAAGGTTCTTCTTGGTGCAGAGTATC-----TTCGTGCGGATCGGAACTTGTGGAATCGA-----AGCGACA-

2650 2660 2670 2680 2690 2700 2710  
PINFES TTCGCTCATGAGCAGGAATTGCAGGCAGTCTGTG-----AGCAGGCTAAGAATGAGCTCATTGCCACAAA-TGAAGCGCT  
::: : : : : : : : : : : : : : : : : : : : : : : : : : : : : : : : :  
HYALO -----CATGA-----TACAGGTCGTGTTTTTCTACAGCAGCATTTGGTTGAG-----TGGAAGAAAGTAAAGAGCA

2720 2730 2740 2750 2760 2770 2780 2790  
PINFES GAAGCGTTCTCTTGAAGAGGATGCAGAGCTCGAGGTAG-ACGAGCTGAAGAGTAAGTACGAGCTGAAGCTGTCAGACGAG  
: : : : : : : : : : : : : : : : : : : : : : : : : : : : : : : : :  
HYALO G----GTTT-----AGGCGACAG-GATGGTGAAGCACGAAC----GACTCA---TGAGCTGTAGCTG-----CG--

```
      2800      2810      2820      2830      2840
PINFES CGTGAGGCGACACTACGCCTTAAAG----GCGAA---AATGGCATTATGAAG
      :  :  :  :  :  :  :  :  :  :  :  :  :  :  :  :  :  :  :  :  :  :  :  :  :
HYALO  -GAGATGTGTTTCTA----TTAAAGCGCTGCGCTGCCAATGGTACTATGCAG
```

---

PITG\_18065

Waterman-Eggert score: 283; 61.3 bits; E(3501) < 5.1e-09  
58.8% identity (58.8% similar) in 311 nt overlap

```
      160      170      180      190      200      210      220      230
PINFES TGGATTT-GACAGCTCCAGTTGTTGCTCTCGAATGGGACACTGAAGGCAGTACAC--TCGCCATTCTACAACAAGGGAGT
      :  :  :  :  :  :  :  :  :  :  :  :  :  :  :  :  :  :  :  :  :  :  :  :  :
HYALO  TTGATGTAGACCTCTCCTCTATTTGTTCTCGATCGGTACACGGAGGGCAGTCCTTGGTCATCATCTCGCCAAAACAGT

      240      250      260      270      280      290      300      310
PINFES AGTGTTCGTCCTCCCTA-TGGGATAACGGCACACGATCAACGTTGAGTCTTGACACGAATCTCAAGGACCCGACGTTTGCTC
      :  :  :  :  :  :  :  :  :  :  :  :  :  :  :  :  :  :  :  :  :  :  :  :  :
HYALO  AACATCGTCTCATTGTTGTGACAACGGGACC-----TGGATCTCGTCATGCATACCGGATATCCGT-GATCGCTC

      320      330      340      350      360      370      380      390
PINFES GGTGGTCCAAAGAGGGTTCGTTACTAGCAGTGGGGACTCAGAAGGGGAACCTCGTTCTCTACAGTAAAATCACTCGGAAG
      :  :  :  :  :  :  :  :  :  :  :  :  :  :  :  :  :  :  :  :  :  :  :  :  :
HYALO  TATTTTTCGAT-AGGGTTTGCTGCAAGCGACGAGGTGAGAGAAGAAGA-CATCCTGCTTTACGCTCAAGTCACGCGATCA

      400      410      420      430      440      450
PINFES CTCGTTCTGTGGTGGG-GAAAC--ACTCGCGTCGCATATTATGCGGATCTTGGAACGGAGACGACAAACT
      :  :  :  :  :  :  :  :  :  :  :  :  :  :  :  :  :  :  :  :  :  :  :  :  :
HYALO  CTAGTTCTAATGATGAGTGATGCGTACTCGCAAGGCA--TTATCTGCAGGTTGAAACGGTGACGACACAAT
```

---

PITG\_08685

Waterman-Eggert score: 333; 44.4 bits; E(1) < 1.1e-07  
54.0% identity (54.0% similar) in 609 nt overlap

```
      70      80      90      100      110      120      130
PINFES CTTGTCGTCAGCACGACTGGGTCCCCCTTGGCGCCGCTTTTGGCGTCGTCCTCGTCGTCGCTGTTATAGTAA-GACTTC
      :  :  :  :  :  :  :  :  :  :  :  :  :  :  :  :  :  :  :  :  :  :  :  :  :
HYALO  CATGTCATCGGCA-GAGTAGCTCTGATCATT-CGCCGCAATTTGGCGTTTTTACCTTTGTCACTGTTTAAACGAATGGCGAT
```

```

140      150      160      170      180      190      200      210
PINFES TTTGCTGCGCTCTGTCCTCTGGAATGTATTTGACT----CGGGCCTTGTTGTGCATGTATTAGATACGTCTCCTACAC
      : : : : : : : : : : : : : : : : : : : : : : : : : : : : : : : : : : : : : : : :
HYALO  GTAGTCTGCTTCTGTCGTCTGAGATGTACCTGTACTGACCCATGCATAGTTG-----GATTTAAA-----CTCCAACGC

      220      230      240      250      260      270      280      290
PINFES AGTAGAAGCTGTTCGAGACCGTGGCGTAGGGCTGACCCACCATGTTCGCTGATCAGTTCGTCGTCAGTGGAGGCATG-GC
      : : : : : : : : : : : : : : : : : : : : : : : : : : : : : : : : : : : : : : : :
HYALO  CGTAG---CTGTCAAAGACCATTGTGTA-----AGCCACTACG--GGGGCCCTATCTGTTCG-----GGGATAAGC

      300      310      320      330      340      350      360      370
PINFES ATAGATGGCCTCCCACGTGTT--CACACTCGACGGAATGCAGAAACCAAAGTTAAAGTCGTAGCTCTTAA-CGATCTCGT
      : : : : : : : : : : : : : : : : : : : : : : : : : : : : : : : : : : : : : : : :
HYALO  GTAAATATCTTCGCACGTATATGCGCACTTCGCATAATACCAAGCACAAACGTTAG-GGCACAGCTTTTTTCGCGATCTCGT

      380      390      400      410      420      430      440
PINFES CGCGGAAATAGTGGCGCTCGATCATGCGCAGGTTATGCACCTCGTGTGGGC-CAACAGAGAACTCGA-GCTCCG--TGGC
      : : : : : : : : : : : : : : : : : : : : : : : : : : : : : : : : : : : : : : : :
HYALO  TTCG-AAAAAATGATGCTCAA-CAT-CTATGGTCGCGGTCTCGTGGTAGCACAAAAAGGTTGTGATGATACAGTTGAC

      450      460      470      480      490      500      510
PINFES GATCGCCGGCAGT-----CGTAGCACGTCCTCAGAGAATTCGTA-----GCGAATGGTGCGGTACGCGC-----CCTCTC
      : : : : : : : : : : : : : : : : : : : : : : : : : : : : : : : : : : : : : : : :
HYALO  CGTCACGTACAGCACGAACGAAGTAAATATAGAGAGCTTCCATATATAAGCGAAGTAAGTAGTAACCACTTCAGCTTCTG

      520      530      540      550      560      570      580      590
PINFES CGCGCGCATGCGAGATATCCATCTTAGGTACAGCCTTGCCTGGTTCGCTTACCGATTTTCGAAAATCTTGCCTTGGAC
      : : : : : : : : : : : : : : : : : : : : : : : : : : : : : : : : : : : : : : : :
HYALO  TATG-GAATTTGATATGTGCACC--AGGAAGTGC-TTG--TAGTCG-----AATATTGAGCATG-AG

      600      610      620      630      640
PINFES TCGAAGTCCGAAATGGAGAAGTGCAAGAA-CTCAATGCCATATTTGTTG
      : : : : : : : : : : : : : : : : : : : : : : : : : : : : : : : : : : : : : : : :
HYALO  ACGATGT---AAA---ATACGTGCAAGAATCTCCGGGCTTTCTTTTTTG

```

---

PITG\_5608

Waterman-Eggert score: 415; 38.6 bits; E(1) < 6.4e-05

50.5% identity (50.5% similar) in 2151 nt overlap

```
      890      900      910      920      930      940      950      960
PINFES GCGTAAATAAGGATTTCG-ATTGGTCATCAGCTGCATCATTGGAGACCGCAGTCGTTGTGAGGGTGACGTACGGCATTGT
      : : : : : : : : : : : : : : : : : : : : : : : : : : : : : : : :
HYALO  GCGTACTT---GATTTCGATTTGCGTTCCG---AGCTTGTGTGACAGCAA-----GTG-GGATAAAAAACAGG---GT

      970      980      990      1000      1010      1020      1030
PINFES GCTCTTGGAAGTGAAGCGAGA-----GCATCCT-CAAGTTGCATCCGTACACAAGAAATAATACGAACACAAGTGTGAA
      : : : : : : : : : : : : : : : : : : : : : : : : : : : : : : : :
HYALO  GTTTTTGGGAATGAAAAGCAGACTGTCTGCAATCGTGCAAG--GCATCTGTTGAGGCGAAACACGCAGAGGCCAAGTTGCCA

      1040      1050      1060      1070      1080      1090
PINFES GCGTAAACGAA--GTCTTGCG-----AAC-----AGTTTGGAGCTTGTTCCTACTCG--TTGAC--AACCAA-
      : : : : : : : : : : : : : : : : : : : : : : : : : : : : : : : :
HYALO  TCGTCATTCACCGCCTTGCGTTGGTCTTCGGTTATCTCGGAAGATAGCAGCGAGCTCGACTGGGCTCGGCATGCAGAT

      1100      1110      1120      1130      1140
PINFES -----ATCATACGCCACACACTGATGGAAGCGTGGGTTGGCT-----TGGCGGAATC-----GATATCCA
      : : : : : : : : : : : : : : : : : : : : : : : : : : : : : : : :
HYALO  AGTGACTGAAGATAATTTGGCACTGA-GAAACTGTGTCCTGACCATGAATGACAGATTCTGTATACTTGTGATATGA

      1150      1160      1170      1180      1190      1200
PINFES TGAC--GGTAGCGCGACGTTTCTCC-----CAGTCAAT-----GAAGAAGAGCTGTAGCT---GAGCTTGACG
      : : : : : : : : : : : : : : : : : : : : : : : : : : : : : : : :
HYALO  TGACCCGTTATCA-GCTGATTCTCCTTTTTTATCGTTCCATTGCAGGGCTGGAAGAAGTGTGCTACGTCAAGAAGTGG-G

      1210      1220      1230      1240      1250      1260      1270
PINFES ATAGACGTGATGGAACACTGA-----CACCAAGTTGACAGAAGAAGGATAGAGGAAGCAGCACTCGGAACGGGTAAATATT
      : : : : : : : : : : : : : : : : : : : : : : : : : : : : : : : :
HYALO  AGATACTTTCTCGACTGGTGAGTGATTGCTTGTGTATCAAGAAGCAT-GAGCTA-CAGTGC-CACATCCTGTTATAG-
```

```

1280      1290      1300      1310      1320      1330      1340
PINFES CATCGACACCTCTTGC--AAGGGGGTCGAAATTCACCTCTGGAAGCATGAGAACG----GTGCTGGAC---TGGAGTCG
: : : : : : : : : : : : : : : : : : : : : : : : : : : : : : : : : : : : : : : : : : : : :
HYALO  CGCCTACTCTATTTGCGCACGATGATTAGCATTGTTTGTGAGAGCAC-ACATCGCTTGGTGC-GGATATCGTGCAGTCA

1350      1360      1370      1380      1390      1400      1410      1420
PINFES AAAGACGA----TGAAAAAGTAGCTGCACATTATCA-ACATGACTGTAAATGTGACAGGGGCGAAGTAGGAGGCACTGTA
: : : : : : : : : : : : : : : : : : : : : : : : : : : : : : : : : : : : : : : : : : : : :
HYALO  TCATCCAGCAATTGAGCAAGCAGAAGCACCGAGTGATAC-----GGAAGTTGGGCATGGGCG---TGGGTAGCA-TGTA

1430      1440      1450      1460      1470      1480      1490
PINFES GCTGATCACGGTCGATAGAATCTGACACATGGCATTCTCCACG--ACTTCGTTCCGGATGCT-ACGTCTGTACCAGTTGA
: : : : : : : : : : : : : : : : : : : : : : : : : : : : : : : : : : : : : : : : : : : : :
HYALO  ATTTTT--AGTCCAAAG--TTTGACAATCTGCTTAGTACATGCTACATCGTGCCCATCACTTACGTCTATGAAAGATGT

1500      1510      1520      1530      1540      1550      1560
PINFES ACGTCTGAA--GGAG-GACGC--GACATCCTGCGAGGAC-----GCACCC--CACAGTGTACACAGCCTTTGCAAACG
: : : : : : : : : : : : : : : : : : : : : : : : : : : : : : : : : : : : : : : : : : : : :
HYALO  CCGCAGGAAATGCAGAGTTGCTTGACAT-----AGCACACTAGCTGCAACCGTCACATTGT-CAT----TTTG---ACG

1570      1580      1590      1600      1610      1620      1630
PINFES ACCAAAACCTCGTCCGTG---TCGGAAGTGTACGCTACACGAA-GTGATA-----CTGCG-ACGACTC--TGGGACTCTGT
: : : : : : : : : : : : : : : : : : : : : : : : : : : : : : : : : : : : : : : : : : : : :
HYALO  TT-----CTAGTCGGTGCTATCGACAGAATAG--TTCACGATTGTGATAGATAGCTGCGTAATACTCATTACGGCACTGA

1640      1650      1660      1670      1680      1690
PINFES GT-GTCGACATATGCTATCG--TTAGCTCCGGGACATAAATGAAGTGTG-----GGTCGGACGCTTGTGTTC
: : : : : : : : : : : : : : : : : : : : : : : : : : : : : : : : : : : : : : : : : : : : :
HYALO  CTTGTCCATTTGGGGTATCACCTACGCTCACGAACAAAAA----GTGTGACCCCATTATCGCGCTTGGCAACTAGTGGTG

1700      1710      1720      1730      1740      1750      1760      1770
PINFES GGATAGTGAGTGTGATGGTTCCAGCGTATCGAATCACGTTGGAAGAGGTCTCGTCAACTGGAATTC---CCG----TTTG
: : : : : : : : : : : : : : : : : : : : : : : : : : : : : : : : : : : : : : : : : : : : :
HYALO  GTTTATAGTGTGTGAGG---CCAT-GACACCAAT-----AAGGCGTCTGTCCAGCTTCTTTTTGTACCGGATTTTTG

```

```

          1780      1790      1800      1810      1820      1830      1840
PINFES AAAGTCGTACAGGAAGAAGCGATGAGATAGAAAATCGTTTGCTATGTC--GCTATCCTGATTGACGAACACTCCACTGCT
      :  :::   ::: : :  ::   :   :: :   :   :   :: :   :   :   :: :   :   :   :: :   :   :   :
HYALO  CAGGTCCACCAGCACGTAGATTTTC-ATCGGCATATGAATGCAATGACTGGCAGTGCAAAGCGA-GGACA-TGCACCGTC

          1850      1860      1870      1880      1890      1900      1910
PINFES GTCACG----ATAGTTTA----AATTCCTCACAGGA--ATGGGAATGAACTTCTTATCGTCTCCACTGCTCGTCGTATCG
      :  ::   :::: : :   :::: :   :::: :   :   :: :   :   :   :: :   :   :   :   :   :   :
HYALO  CTAGCGCAAATAGCTGAGCTCAATTTGTGCAAGGATCAACGCAA-GAA-TGGTTA-----CGTAGCATCG

          1920      1930      1940      1950      1960      1970      1980      1990
PINFES ACCAAGAAAATCTCGTGCAGAATTAGCTTGGAAGT-CTGTAAAGCCTCGAGATTGCACGAATATTCCGATACTGCGCTCA
      :  ::::   :   :   :: :   :   :   :   :   :   :   :   :   :   :   :   :   :   :   :
HYALO  --CTAGAA-----GGCGCATT--CTGAGTATTACTGTGA--CTTGTAATTACA-GAATATCAACAGAGTGCGCGTA

          2000      2010      2020      2030      2040      2050      2060      2070
PINFES C-TCCAAAGTGCATCCACGAAGGAGAATCAGCCACGCCAACGCTGCCTGGTTGACAGTAGGCCAGTTCAT-GTGTACGCG
      :  :   ::   :: :   :   :   :   :   :   :   :   :   :   :   :   :   :   :   :
HYALO  CGTGTTTAGCTGATGAA-GATGTACTGGTAGACACAATAATTCTGTGAGGCTGT--ATACATCA-TTCATAGTTTC-GAA

          2080      2090      2100      2110      2120      2130      2140      2150
PINFES GTCGAAATCCGATGAGCGTGCCGTTGACGTGATAGCTGGCCAGTACGAA--CTCAAGATGATCAATGCCTTCAT-TCGAT
      :: : : :   :: :   :   :: :   :   :: :   :   :: :   :   :: :   :   :: :   :   :: :   :   :
HYALO  GTAGGAGTTAGATTGTCAGCACGCAAACGAGAGT----GCAAACACAAAGACTGATGATGTTGAATAGAGTCATATTGAG

          2160      2170      2180      2190      2200      2210      2220
PINFES GCCGCGTCCGAAGTCATCTTCATGCCTACTGGCGTCTGA---AGTACAC--TGGATGCAACCGACCGATAGTTCAAGAAT
      :   :   :: :   :   :   :   :   :   :   :   :   :   :   :   :   :   :   :   :
HYALO  GAG-----CGATGTCGACAACATGC-TACACGACATTAAGATAGTGAACGGTGGAGCGAACCGGACATTATTGCAACAAG

          2230      2240      2250      2260      2270
PINFES G-----GCAACGTGGTGAACCAACCGTC-----GATGTTGT-----TAA--CTATTGACGATCGTCCAC
      :  :   :   :   :   :   :   :   :   :   :   :   :   :   :   :   :   :   :
HYALO  TCACAGCCGAAAGATCGTGAAGAACACGTTACAGCATGAGGTAGTCTTTTGTATCGATAATTCTAATGA--ATTGACTAT

```

```
      2280      2290      2300      2310      2320      2330      2340      2350
PINFES T-GCGTTGA-ATTGAGTCGAAAACAGCGCAGGAAGGTGCTTGAGGGTTCGAAATGTTGCAGAACGCAGAGGTTCCCCAGTG
      : : : : : : : : : : : : : : : : : : : : : : : : : : : : : :
HYALO TTGCGTTGTTATTGC--CGGATACAGCGCATGAAGATACTGTGCGATCAAATTGTTCCATAGCACAGAGACTCCAACGCG

      2360      2370      2380      2390      2400      2410      2420      2430
PINFES CCTGACACGACACGATATCTTTCTCGCTTTGGTAAAAGTAACATGCAGTGGTGGCAGA---CAGAAACAT-GTCGTCAAG
      : : : : : : : : : : : : : : : : : : : : : : : : : : : : : :
HYALO CATGAGACGAATCGGTGTACCGCTTGATTTTCTCAAC--AACAGCAACTTATGGCAAAGTGCAGAAACGTTGTCATTGAG

      2440      2450      2460      2470      2480
PINFES AACAGCA----CTAGCGACGGAAACGA-----CCGACTCGAAGCTGCCAG---TTTC---TTCCTTCAG
      : : : : : : : : : : : : : : : : : : : : : : : : : : : : : :
HYALO GACAGCATGTACGAGCGACA-AAACGCGAAGCCTGGAGTGCCTCCGACT-GAAAATGGCTCACCTCTCGGTTGCGCTGAG

      2490      2500      2510      2520      2530      2540      2550
PINFES GAAGGACGAGAACGTTCATG-TCCTTCGCGT-----TGT-TAAGTGTG-----ATCTTGAGCTGATCAAGTTGATG
      : : : : : : : : : : : : : : : : : : : : : : : : : : : : : :
HYALO CACGACCGAAGCCGCCTTGCTTTTTTCGCGTGCCTCTTTTGTATAAGTTTACTTCACATTTGTTATTTACTCA---GATA

      2560      2570      2580      2590      2600      2610      2620
PINFES TGTGTATTGCGAACACACTTTTGGACTCATCAATAAACTCGTGACCTGCTGAT-AGTCATTTCGGACAG-----
      : : : : : : : : : : : : : : : : : : : : : : : : : : : : : :
HYALO TCGGTACATCGATAACA-TATCGAACAAACACCAA-AGGCGCAACACCAGGTATTTAGT--TTCGTCCACCGTTGTGCTT

      2630      2640      2650      2660      2670      2680      2690
PINFES GCACACAC-GAA--GCTA--TTGCTAGCTACAATCA-TCATTGGATCTGGACATGGTTTGCACGTGTAGGTGGAATAGTC
      : : : : : : : : : : : : : : : : : : : : : : : : : : : : : :
HYALO GTACAAACAGAAATGTTAAGTGTCTAT-TTCAGTCAGTCAT---ACC--GAGATGATCT-CACGCTT-GGTTCTACAATT

      2700      2710      2720      2730      2740      2750      2760
PINFES AGCGACTGTGTTTCGCGGCACATTCCACACATTCTTTTTCGCTCGAGATAGCTGCCATCCTCGTTTTTCTCTT
      : : : : : : : : : : : : : : : : : : : : : : : : : : : : : :
HYALO AC--ACAGTCTTCTTGCTGTCGTCCTGCTTCTCTGTTGCACCGGCACAG-----ATCATCGTTTTTGAAGTT
```

PITG\_3600

Waterman-Eggert score: 868; 73.9 bits; E(1) < 1.8e-15

53.3% identity (53.3% similar) in 1799 nt overlap

---

|        |                                                                                  |                                                         |                     |                         |       |       |        |       |      |
|--------|----------------------------------------------------------------------------------|---------------------------------------------------------|---------------------|-------------------------|-------|-------|--------|-------|------|
|        | 510                                                                              | 520                                                     | 530                 | 540                     | 550   | 560   | 570    | 580   |      |
| PINFES | GTCTCCTGTGAATTCACG                                                               | GAGAT-GTTGAGCCGCGAG                                     | TGTTGCGAAGCGAACGGAA | -CATTAAATGGGCTTGAGAACTA |       |       |        |       |      |
|        | :: : :::                                                                         | : ::                                                    | :: :::              | ::::                    | ::::: | : :   | : :::  | : ::: | ::   |
| HYALO  | GTATACTGACTAATCTAG                                                               | GTGATTGTTGA---GCGAGACGGCTGGGGGTGAATTGCTGCAT--ACGGGGCTTG | CATGGTA             |                         |       |       |        |       |      |
|        | 590                                                                              | 600                                                     | 610                 | 620                     | 630   | 640   | 650    |       |      |
| PINFES | TCTGGGATCAACTCGGCTAACACAA----                                                    | AGGCGTTGTCCAG--CCATGAGTACATTTGCTGTGGCTTCAC----          | TGGCG               |                         |       |       |        |       |      |
|        | :: :::                                                                           | :::                                                     | ::::                | : :::                   | : :   | : ::: | :: ::: | : :   | :::: |
| HYALO  | TCGAGGA-----GGCGGACACATTTACAATCGGTGTTTATGACAATGGACACTGTTTCCGAAG--TCAAATTATGGCG   |                                                         |                     |                         |       |       |        |       |      |
|        | 660                                                                              | 670                                                     | 680                 | 690                     | 700   | 710   | 720    | 730   |      |
| PINFES | --TATTGAAACGCACCGATCCTTCCGGCGT                                                   | CGTCTGTGGGCCTGGAGTTTCACCAGTGATGT--GGTGAAACGCAGCAAA      |                     |                         |       |       |        |       |      |
|        | :: :::                                                                           | : ::                                                    | :::                 | :::                     | : :   | : :   | :::    | :::   | :::: |
| HYALO  | GGTAGCGAGACGGAAGGA---ACCGTCGACCTTTTCGAGACAA-AG---ACCCAT-ATGGCAGGT-AAAAGCGCAAA    |                                                         |                     |                         |       |       |        |       |      |
|        | 740                                                                              | 750                                                     | 760                 | 770                     | 780   | 790   | 800    |       |      |
| PINFES | CTT--TGGCAGTTTGAAAGTGGATTCA-AAC-ACGTGAAAGGACGTGTGATGGCCACGTGAACCTACGAGCACCTTGAAA |                                                         |                     |                         |       |       |        |       |      |
|        | :::                                                                              | :::                                                     | :::                 | :::                     | ::::: | : :   | :::::  | : ::  | :::  |
| HYALO  | CTTGGTGACA---TGAAGGTG---TCATAACGACGTGGAGTGTTCGTGTGATGGC-----ATTAG----TTGGTG      |                                                         |                     |                         |       |       |        |       |      |
|        | 810                                                                              | 820                                                     | 830                 | 840                     | 850   | 860   | 870    | 880   |      |
| PINFES | TCGAGACGCGCTGCAGCATCTTTAG---TCACATTCAGCGGAATTCGAACTG-TCGAACTCATAGTTGCTGGACGAACGA |                                                         |                     |                         |       |       |        |       |      |
|        | :: :::                                                                           | :::                                                     | : :::               | : ::                    | ::::  | ::::: | : :    | : :   | :::: |
| HYALO  | ACGCGACGTGCT-----TGTTCAGGGGTGAC-----GAAAACGAACCGATAGAGCA-ATGGCTATTGGTCTAA-GA     |                                                         |                     |                         |       |       |        |       |      |
|        | 890                                                                              | 900                                                     | 910                 | 920                     | 930   | 940   | 950    | 960   |      |
| PINFES | CCAAAGCCTCGCCCTCGAAGATACCCGCTTCGGACTCAAACACAATTACCATCTTGATAACTG--CGTCGTTCTCGGTC- |                                                         |                     |                         |       |       |        |       |      |
|        | : ::                                                                             | : :                                                     | : :                 | : :                     | ::::  | : :   | : :    | ::::  | : :  |
| HYALO  | -----TAGCGGTTGCACATGCACACCTC--ACACGTACACGATCTCGGTCGGGGAATCTTAACGTC-TTATCAGAAT    |                                                         |                     |                         |       |       |        |       |      |



```

          970          980          990          1000          1010          1020          1030
PINFES ---GACTTTCGAGCTCAAAGTTTGGGGCGCTTTTACTTGCTAGTGAG-CCTACCTTGAGGTTGGTGTCTGGCTCGAATAC
      : : : : : : : : : : : : : : : : : : : : : : : : : : : : : : : : : : : : : : : : :
HYALO TGTGATCCGTCAAGCTTGGAGTTTGTG-CAAGCTTCATTGATCAAGAAACGCACCCCACAGTTCGTGTTAGCGCAAATGC

          1040          1050          1060          1070          1080          1090          1100          1110
PINFES GTAGCCCTTTTCCTGCTGTCTGCAGTACCGGCCTGGTTTGCCTCTAACGACTTGATT-TCCAGCT--GTAGCGC-TGCTCG
      : : : : : : : : : : : : : : : : : : : : : : : : : : : : : : : : : : : : : : : : :
HYALO GCAACCTTGTTCTGCTGT-GCTCTAC-----TCTTACAAGTTGAGTCTGCAACCTCGTAGATTGTGATCG

          1120          1130          1140          1150          1160          1170          1180          1190
PINFES ATGTTTGGACAGTTTCGCTACCTCTTTCTCTTCCTGACTTGC-CTTATCATTGGTACCAGTACTGGACACTCCTGGGGCA
      : : : : : : : : : : : : : : : : : : : : : : : : : : : : : : : : : : : : : : : : :
HYALO GCGCTGGGATAACTTTGCAACTTCCTGCTGCTTCT-AGTTGCACTTATCGATGG-----CTGATGAATGTGGTGCCG

          1200          1210          1220          1230          1240          1250          1260          1270
PINFES GGAAAATCACCCGTGGCAGTGAAATAGCCGCGAATCTCTCCGTCTGCTGAACAGCAGA--TAATCTCGTCTTTGCCATTC
      : : : : : : : : : : : : : : : : : : : : : : : : : : : : : : : : : : : : : : : : :
HYALO GGAAAATA--CCGTAATCGTGAAACGGCCAAGAGCCTCTCCAACAGCTGAGCAGCAGTCCATTCTCTCCGTGC-----

          1280          1290          1300          1310          1320          1330          1340          1350
PINFES ATGCGATAGTCTGCCGTCACAAGGGCCGCCACAGGCGATTTAAGCACTTCTTATGCACGGCTTCTCCGTTCCGACGCTT
      : : : : : : : : : : : : : : : : : : : : : : : : : : : : : : : : : : : : : : : : :
HYALO ACGCGATGATCCGCTGTCACAAATATCG----AG-----AGCACATGTTTGTGTACGCCACGCCCC--CGTCA-CGT

          1360          1370          1380          1390          1400          1410          1420
PINFES TCGCGCCTCGAACTTGCCGTTGC--TCCAGCCCATAACGATCTCCTTCTCTCCATCACCGTCGATATCAAAGCTGTGGAT
      : : : : : : : : : : : : : : : : : : : : : : : : : : : : : : : : : : : : : : : : :
HYALO TACTGAAACGAAGTTGCTGCTGCGATCCGACGCATGATAATTTACTTTCCGCGTCTC-GTCGATATAAAAGCTATGGAT

          1430          1440          1450          1460          1470          1480          1490          1500
PINFES TGCCGTTGGAACGTTCTTCGATTTAACACGCCATGCACGGTGCTTCCCTTTGTAGACGCCCTACGGTGCCGTTCTGAAGAG
      : : : : : : : : : : : : : : : : : : : : : : : : : : : : : : : : : : : : : : : : :
HYALO TGTCTGGACATCCGCTTCGACTTGACTCACCTGCACGTAAACACCCTTT-TCGACGTCCATAGCTCCATTATGCAAAC
```

1510 1520 1530 1540 1550 1560 1570 1580  
PINFES CATAGCCGAACATTTGCTTCTTAATCGCTGTGAGTGCCAGCAC-TCGACTTGTCTCCGTGCACTCGAAAACACTTCTTCT  
:  
HYALO C-----GCCTACACATAGACA-----CACTCGAGCACAACCTTCCCTC

1590 1600 1610 1620 1630 1640 1650 1660  
PINFES ATT-CTGGAATGCTCGG-ATCTCAAAGTCATCTGATCCGGCAATGAGTTCATC--GCGTCCATGGCCAGTCACAT---TC  
:: :::: ::::: : :::: ::::: : : :::: ::::: : ::::: ::::: : ::::: ::::: :  
HYALO CTTTCTGAAATGCTCAGCATCT-AAAGT-ACCCGATCTGGCAACAACTCATCAGGCGTC--GACCAGCCACATCCTTC

1670 1680 1690 1700 1710 1720  
PINFES ACTGTCA-GTGCA-----CGAACATGATCTCCAGTGACTGTCCAGAAGAGCTCACCACCGTCCCGACCGA  
:: :::: ::::: : ::::: ::::: : : : : ::::: : : : : : : : : : : : : : : : : : : :  
HYALO AC-GTCGCGTACAGTCGTAGGATACAATCGGACATGATCTTCCGCGCTCGTCCAGTGTAGTCCGTTCTCATCACGACC-A

1730 1740 1750 1760 1770 1780 1790  
PINFES AGCCTTGCAGCGAGCAGTT---TCCGCCACCACGACCATCTGAGACGGAGAGTTTACCAACGAGG---CAGTGCGTGGT  
: : : : : : : : : : : : : : : : : : : : : : : : : : : : : : : : : : : : : : : : : : : : :  
HYALO AATTTTACCGCCAGAGGTAAGCTCCTTCTATCACGACCACGCGATGTGCA-----CAACGTGATCTCAGTACGAAGA

1800 1810 1820 1830 1840 1850  
PINFES GCAGGTGC-----GAAGAGC-ATGGCACTCACGCCATCG-----GGAACATCCTT-ATAGAAGATGTTCGG-----AGT  
: :::: : : : : : : : : : : : : : : : : : : : : : : : : : : : : : : : : : : : : : : : : : : :  
HYALO GATGGTGTGCTTGAAGATCTATGGGTCGATGGGAATCGATTGGTGTGTACCACACATCATGCAACATTCAGGGCACAAT

1860 1870 1880 1890 1900 1910 1920 1930  
PINFES TCTTCTCCACGTCGTAAGCCAGCAAGCTGG--ATTGTGTGCCACTACGAGCGTGTGCGCCCTGATCTGCGTTCTCGAACT  
: : : : : : : : : : : : : : : : : : : : : : : : : : : : : : : : : : : : : : : : : : : : :  
HYALO GAAGCTCCA--TGGTA---CAGGA-GCTTATCATTTTTTGACAACCT-GTGGACATCGCCATG-TC-GAGTAG-CAAAC-

1940 1950 1960 1970 1980 1990 2000 2010  
PINFES TGCCG-GCTGCCAGTGCCGTGACCTTGCGATTG-----ATCTTGAGGAAACGCACGCTACTTTGGTTCGCTGTCATCTGCC  
: : : : : : : : : : : : : : : : : : : : : : : : : : : : : : : : : : : : : : : : : : : : :  
HYALO --CCGTGCTGACGTT--CGTGAC-TGGCAACAGTAACAAGCTCAAGGAGGTCATAGCTATCCTGGGCAGTGAC-TTTCCG

```

                2020      2030      2040                      2050      2060      2070
PINFES TCCGAGTT---ATCCCGAAAGGTGTTCTCGTTT-----GGCGAGTG-GATGAATACTTTGCCCGCAGTAGTGCCG
      :  ::: :      :  :  :  :  :  :  :  :  :  :  :  :  :  :  :  :  :  :  :  :  :  :  :  :  :  :
HYALO  TTTGAGCTGCGTAATCAGGATGTGGATCTTCCTGAGCTGCAAGGCGAGCCAGCTGAAA---TTGCCAAGGAGAAGTGCCG

```

```

            2080              2090      2100              2110      2120      2130      2140
PINFES CAT----GCCAAC-----GCGGGGTGGCGACC--GTCGA----ACTTTCCTACTTGTGCTACACGCTCAAGAATCGGCTG
      :      :  :  :  :  :  :  :  :  :  :  :  :  :  :  :  :  :  :  :  :  :  :  :  :  :  :
HYALO  TCTCGCGCCAAGCAGGTGCAGGGTGTGATTGGTAGAGGACACGTCGCT-CTGTTTCAATGCGCTCAAGGGACTACCA

```

```

            2150              2160      2170
PINFES GTGC---AAAT-----GTACTTGGA--AAGCAGGTAAC
      :  :  :  :  :  :  :  :  :  :  :  :  :  :  :  :  :  :  :  :  :  :  :  :  :  :
HYALO  GGGCCTTACATCAAGTGGTTCTTAGAGAAAACGGGTCAC

```

---

PITG\_4848

Waterman-Eggert score: 399; 54.9 bits; E(1) < 7.4e-11  
61.7% identity (61.7% similar) in 332 nt overlap

```

            110      120      130      140      150      160      170
PINFES CACCGATACAAGGAGCACCCGAGTA---GTGTCAGCGACCCTCGAGTGAAATCCCCAAAAGGGTTCCGTGCTTTTCGCCTG
      :::  :::  :::  :  :  :  :  :  :  :  :  :  :  :  :  :  :  :  :  :  :  :  :  :  :  :  :  :  :
HYALO  CACTAATAGAAG-AGGATGGACGTAAAGGTGTC----AACCTCGCCTG-----CAA---TTTCTCGCTTTAGCGTG

```

```

            180      190      200      210      220      230      240      250
PINFES TACATCAGCCAGGTGTTTCGTGCAGAGCTTTCTTCTATGTTGTGGCG-GAAGGCGCCTGGATCCTACGATGCCGCTGCAAA
      ::  :  :  :  :  :  :  :  :  :  :  :  :  :  :  :  :  :  :  :  :  :  :  :  :  :  :  :  :  :
HYALO  CACGTCAGCCACGCGTTCGTGTCGAGCTTTCAACTACGTTGTGGCGAGAAGGA-CATAGATCCTACGACCCAGTGCAAA

```

```

            260      270      280      290      300      310      320      330
PINFES CATAGACACACGAATCACGAC-CCGG---GAAGCAAACCATTTGTCTGCAAAGGCCCAAGTGCGGCTGTCAAGGATTTG
      ::  :  :  :  :  :  :  :  :  :  :  :  :  :  :  :  :  :  :  :  :  :  :  :  :  :  :  :  :  :
HYALO  AATGGACGCACGAC---CGATACCGGATAGACGCAAACAGTCGCATGCAAGAAGTCTGGGTACGACTGCCAGACAGTGG

```

```

          340          350          360          370          380          390          400
PINFES ACAGTCCGTGGGTTTGC AATTGCGACCATCCG-TGGGGCGCG-CACCGCCAGCATCTTG---TCGAGAAGAAGTTTGACC
      :::          ::: :::: : : : : : : : : : : : : : : : : : : : : : : : : : : : : : : :
HYALO  ACA----AGGGGCTTGC--TTACG--CATACGATCGAAAGTATCACAGCCATGAACCTACGTTTCGAGCAC--GCTTACCC

          410          420
PINFES CGCTGCAAATGT
      : : : : :
HYALO  ACCTCCGCATGT

```

---

PITG\_21013

Waterman-Eggert score: 1051; 91.9 bits; E(1) < 5.4e-21  
53.9% identity (53.9% similar) in 1906 nt overlap

```

          40          50          60          70          80          90          100          110
PINFES CGCTGTTG-TCATCCATCCC GTGGTGTCTGCGGAATACTGCGCTGTGTGTTTCAGCGTGAATCATCTCGAGGTATTTCGGC
      : : : : : : : : : : : : : : : : : : : : : : : : : : : : : : : : : : : : : : : : : : :
HYALO  CGATCTTGGTCACGCATCGTGTAGTGT-TGCAATATGCTGCACTCAGCAATTCAGCATGGATCACTGTGGGTTACTCGGT

          120          130          140          150          160          170          180          190
PINFES ATTATGAATTTCGAACCGGCGCTGCCGAATGAGATGCCCAAGGTCCCCGATGGTCCCTCCGTCGTTGAGGTCATGATCGA
      : : : : : : : : : : : : : : : : : : : : : : : : : : : : : : : : : : : : : : : : : : :
HYALO  GTTTTGTGCTTTGAACATTC-CTGCTGAGGCAGGCGTTAAAAGTCCCCACTCGTTCTGCCATCGCCG-----TAAGC--

          200          210          220          230          240          250          260
PINFES GAATCAAGTCCATGAGAACGTCGCACATCCGGCGCACTTCAATATTCGGCGCATCAGCAGCG-----AGAAGCA-----A
      : : : : : : : : : : : : : : : : : : : : : : : : : : : : : : : : : : : : : : : : : : :
HYALO  -AATTGAGTCTATTAGCACGTCTCACATCCGGCGTACTTCAGT--TCTG-GCAGCGGGAACGGACTTACAAACCTTTTGA

          270          280          290          300          310          320          330
PINFES GTCCG-GCACAAAGCCGACACCAAAGAGAATATCTTCAA--ACGTATCGGGG-TGCCCTCAGCATGCGATAAAATGCATAA
      : : : : : : : : : : : : : : : : : : : : : : : : : : : : : : : : : : : : : : : : : : :
HYALO  CTACGTGCTAGAACGCGATTGCGAGTGGGTGAGCTACATTGAGGTA CTGATCCTGCCTCTG-AAGGAACAGAACGCAAAT

```

```

340      350      360      370      380      390      400      410
PINFES AGGATCTGTAAGGTGAGCTCGTTGTCGTGCTGTTTCTCTTGGAAATAGTGAGTGCAGCGTGCGCACAAAGTCGAGATGATGA
:: : : : : : : : : : : : : : : : : : : : : : : : : : : : : :
HYALO  AGAAGTTATGATGTGAGCAGGTA-TCGTGCTATGT-TCTTGGCAAAGTAAG-----

420      430      440      450      460      470      480      490
PINFES CAGCAGAGGAGCACACTTTGGTTCCAATGCGAGCGTGCTAACAAACAGTACGACTTCCAAAATCATGTCATCTTGTGAAA
:: : : : : : : : : : : : : : : : : : : : : : : : : : : : : :
HYALO  -----CGGGGTATACGT-----AATGCGAGCA--CTGACGCAAAGTACAATGTTAAGGACCGTATCGTTGTGCGGAA

500      510      520      530      540      550      560      570
PINFES AGCCCGGTACAAGGAGTTTGT--TGAGTAGCGGGATAACAGAATGGTCTGTCACCAATCTGTCCCATGAACCCTTCGACG
:: : : : : : : : : : : : : : : : : : : : : : : : : : : : : :
HYALO  AGTC---TACCATGAGCGGCTCGTGAAAAGTGGGAAAAGCGAGTGATCTACCGCCAATATGTTTCGTGCACTCTCCAGTA

580      590      600      610      620      630      640      650
PINFES GTAGATCACT---TGGCGTCATGTTTGTAGCGTGCCTACAACAGAAAAGTCGTGGTTGTCAGTAGTAAGACAT
:: : : : : : : : : : : : : : : : : : : : : : : : : : : : : :
HYALO  GTAGGTCGCTCCGTGGAATCATGTCCGCTCACATCACCAGTTCCTCAA-----TTGTCCGTGACGTGTCAA

660      670      680      690      700      710      720      730
PINFES AGCTCGATAAA-TGGGACCACGAAGGGGGCCACATGCCTCGATACTTGTACGCCTTGTCGCTGACCAAATCTTCCTGCA
:: : : : : : : : : : : : : : : : : : : : : : : : : : : : : :
HYALO  AGTTCAGTGAAGTGGTGTACGATTGCAGCGTA--AGCAACGGTATTTGGG-GCTTTTTTCGCTAACCGAA-CTTG-TGCA

740      750      760      770      780      790      800
PINFES GCGTG-TACGACCACAGTGCAATATTTGCAATCACCTT-CATCAGCAGCGGGTCGCGAGTGCGAAATACACGTGAAGCAA
:: : : : : : : : : : : : : : : : : : : : : : : : : : : : : :
HYALO  GCGGGGTATGACTA-AGTGATATGCTTGTGAGCTCCTTTCCTCCGAAGCGAGTCGC-AGTGCAATACAAACGTGATACAA

810      820      830      840      850      860      870      880
PINFES GAGCTTCTAGACCACGGT----TCTGGCACATGAGTTCGGCATTGCGCGCTTGTGGCTGAGGTTTACAGACAGCGCAGC
: : : : : : : : : : : : : : : : : : : : : : : : : : : : : :
HYALO  GTGCTT-TAAA----GGTGCATTTGACGCATGAGATCGAGTTTGTGAGCCAACATGC--AGGT-----AGCACGGC

```

```

      890      900      910      920      930      940      950      960
PINFES CAGCTCCTTC-GCCACGATATTCTGTGGGAAATTAATTACCAGTTGCATGACGATTGGGACTGCCTCTGTGTATGTGAAC
      ::: : ::: : ::: : :::: : ::: : : : : ::::: : : : : : : : : : : : : : : : : : : : : : :
HYALO  TAGC-CATTCTGTCACAGTGGTCTGCGAGAAGTTCAT--CCAGTTGCAC-ACGATTGGATGTGTCTCCCTGCTGATGGAC

      970      980      990      1000      1010      1020      1030      1040
PINFES ATTGACTTGCATCGATCGTTCGATGCTGAGGTGGTAAAG-GATTTCGTAGGGAAAGCGCTCGAAAAGGAGGTTTCTTCAG--
      ::  :: : :::: : ::::: : : : : : : : : : : : : : : : : : : : : : : : : : : : : : : : :
HYALO  ATAAGCT-GAGTCGACTATCGATGCCGATATGATACAGAGACACCG-GTTACAGCGCTC-----ATCTTTTTTTGAGAG

      1050      1060      1070      1080      1090      1100      1110      1120
PINFES TAGCTCCACCAGCT-TCGGGATAAGACTATTTCTCACCAGCACTTCGCGAAGCGTTGGATCGAAGGACAAGTTAAACAGC
      :::: : : : :::: : : : : : : : : : : : : : : : : : : : : : : : : : : : : : : : : : :
HYALO  TAGC-CCCAAGCTCTCCCAACGACACTCTT-CTCGCCACCACTACC-----TGGAT----GGTCGAGTTGGATAGC

      1130      1140      1150      1160      1170      1180      1190
PINFES AGTTTGAGTGATGTCTGGATGGGTTTGTCTGGTTACAA-TTGAGGTATCGCACTAGCTTTTCCACCACTGAAAGCTCCA
      :           : :           : : : : : : : : : : : : : : : : : : : : : : : : : : : : :
HYALO  A-----CGGG-----CTGCTAACAACTTGAAGTGTCG-AGTCGGGTGGCACGGACTGCTAACAGCA

      1200      1210      1220      1230      1240      1250      1260      1270
PINFES TCATTGCGTCCTTGTTTTCTCAGAAATGCTCAACTTCTTGAG--GAATGTG---ATAGTCAGAATT--ACCAGATCGGG
      :   :::           : : : : : : : : : : : : : : : : : : : : : : : : : : : : : : : : :
HYALO  TTTTTG-----TGCTGTCTG--AAGGTGTTTCG-CTGGTAGGGCCGCA-GTCCACATAGT--GCATTTGATCAGGGTTTG

      1280      1290      1300      1310      1320      1330
PINFES TGCTACACGATCCAACAACCTT---AGT-----CAGGAAATCACAATCTTGCGC--TTGA---CCATCTTGCGCTCGG
      ::::: : : : : : : : : : : : : : : : : : : : : : : : : : : : : : : : : : : : : : :
HYALO  TGCTACTCGATTCCAACAACGTGCCAGTGTCCAAGCACCAACAATACAAGGATGTGACATTGAGTCCCATCTA-CGA-CGG

      1340      1350      1360      1370      1380      1390      1400
PINFES TATGAATGTCTTCTGCCAGGTTTCAGCAGCAGCTGAAGCACACACAGAA-----CAGTTGGTCTTGCTTTTTTCATGC
      :  :   ::::: : : : : : : : : : : : : : : : : : : : : : : : : : : : : : : : : :
HYALO  CAGCA---GCTTCTGACAGATTCAAAAACA-GTCCAAGCGAACAGCTAAACTCGAGCCAGTACAGCTTCCGGTGACTTCT

```

```

1410      1420      1430      1440      1450      1460      1470
PINFES GCTTTTTGTTGCGC-----TTCT---TCTCAC-----GGTCA----AGCTTTGCTAGCGCAAAGTCGGTATCGTCTGTTG
      : : : : : : : : : : : : : : : : : : : : : : : : : : : : : : : : : : : : : : : : : : : : : : : : : : :
HYALO GCTTCTTGCTTCTCCCGCATTCTCATTCTGCCTGTTGGGTGAGTTGAGCTTTACCGGACTACAATTTCTTGTATCCGATG

      1480      1490      1500      1510      1520      1530
PINFES GGGCCTCATGTGCGG---TGGCTTCAA-----GCATTTTTCCCTCTTCGAG-ACGTA----GCTGGTGA---CGCTTAAG
      : : : : : : : : : : : : : : : : : : : : : : : : : : : : : : : : : : : : : : : : : : : : : : : : : : :
HYALO TGCTTTCATACGCTGCATTTGCTGTAAAAGTAGCAGTTCTCCTCCT--GAGTAAGTAAAATGCAGTTAAAAGCACCTAGG

      1540      1550      1560      1570      1580      1590      1600      1610
PINFES CTCAAACTCGACGA---TCTTCAGTGTGATAGCCCCAATGCGGTAGTTAGCCAGTAGCGCATGTAAGTGTAGGAAGTTGG
      : : : : : : : : : : : : : : : : : : : : : : : : : : : : : : : : : : : : : : : : : : : : : : : : : : :
HYALO CTCGAACTTTACGTCCGTCTTGAGCGTCTGTACTCGAGCCACTAATGAG-----GGGCCGTTGACTGGCTGA-GCTGC

      1620      1630      1640      1650      1660      1670      1680
PINFES AGAAGC-ACCAGAAGA--TACGCATCATG---ATGAGCGAAAAGTCGTAGCTTTTCTTGT--AGTCGTCATTCAGAACAC
      : : : : : : : : : : : : : : : : : : : : : : : : : : : : : : : : : : : : : : : : : : : : : : : : : : :
HYALO AGCTCCTACCTTTAGCCTTACTAATGAGGTGAATCAGTGAACACTCG-AG---TCCTAGCCAAGTCGCC---TAGTACAC

      1690      1700      1710      1720      1730      1740      1750
PINFES GCGACAACAGGCTCATGAGTGATTCAT-TC-----TGCACGAGGACTTCAATGTTG--CCTGCATACTCTGCCAGTTCA
      : : : : : : : : : : : : : : : : : : : : : : : : : : : : : : : : : : : : : : : : : : : : : : : : : : :
HYALO AC-----CTCATG---GCTCCATCTCAGCTGGTGCA-GCGTACCGCAGCGTTTGTCAAGCAG-----CAGCTCA

      1760      1770      1780      1790      1800      1810      1820
PINFES AGGATCATCTTGGCGCCCTGCA-GCTTGGACTCGACATCGTCATCGTAAAGTTTCTCCATGTAGGC
      : : : : : : : : : : : : : : : : : : : : : : : : : : : : : : : : : : : : : : : : : : : : : : : : : : :
HYALO AGCC-CAAC--GACGCGTCGCACGATTGGGG-CCACATTG-----AACGTGTCTGGACGTTGGC

```

---

PITG\_2721

Waterman-Eggert score: 268; 33.6 bits; E(1) < 0.0006

49.7% identity (49.7% similar) in 1397 nt overlap

```

                20          30          40          50          60          70          80
PINFES GTGCT-ATTGGTGCCGCTTGTTCTCGTAGCGGGTGTTCGCTGCCAGTCTGCTCCC-AGGAAAGTCGTGTACATACAGCCT
      : : : : : : : : : : : : : : : : : : : : : : : : : : : : : : : : : :
HYALO  GTGCTCATTTGTGTAGGGAATTCGCGTC---GGTTATCGACGCCGCAATGTTACGATCTAAGC--TGCCCATCGTGGTT

                90          100         110         120         130          140          150          160
PINFES TCATTCT--TTTTGGTGACATTACCGTCACGGAACACGAGATCAAAGC---CTCCCATATGCTCCTGAACGACCCCTCG
      : : : : : : : : : : : : : : : : : : : : : : : : : : : : : : : : : :
HYALO  TCAAACGACTCTTCAGGA---TTCCAGCACAGTACAAAAG-TCAACGCTATCACCTCTAGGCT-----GGTCCCTTCG

                170         180         190         200         210         220
PINFES GGTTC- TGCTCTCGAGGTCGATTATATCAAGCATATCGTTCAGCATTCGCG- ACTTG-----AGCTG-----ATA
      : : : : : : : : : : : : : : : : : : : : : : : : : : : : : : : : : :
HYALO  TTAGTACGTGTTTCGTCAG-TCGATAATGTCGAGCATTT-----GGATCCCGTGACTTGTTGGTAGCTAGCGACCGCACA

                230         240         250         260         270
PINFES ATCTGACGAGGTGT-----TAGCTGAAAGGGAAG-GCGAA---GCGTTCACCTCCAAG-----AG
      : : : : : : : : : : : : : : : : : : : : : : : : : : : : : : : : : :
HYALO  AGCTGAACTGTTGTGCGAAGATATCTGGGACAGAACTGAGAAACAGCGTT-ACCTACGATGGTAAAATATGTGCTGAGCAG

                280         290         300         310         320         330         340
PINFES CCACACCTTGAGGTTTTTCATCGATCATAATGTCGT-ATCCGTACAGCTCGAAGCAGTGTTTAT--CGTTCATG-----
      : : : : : : : : : : : : : : : : : : : : : : : : : : : : : : : : : :
HYALO  CTACAGCTTTGGATTCTGTT-GATCATGCGG-CGTCAT--GAACAGCCCTGAGCAGTATTTGTTTCGATCACGGCGACTG

                                350          360          370
PINFES -----ATGATCTTT-----TCGAC--GCTGAGCAAAGAC
      : : : : : : : : : : : : : : : : : : : : : : : : : : : : : : : : : :
HYALO  GTATAAACTGGATGAGAAGTGTGATGCGGAATAACCAGCATAATGACAATTGTGATCAATCTACTTGCCCAACAAAGGA

                380         390         400         410         420         430         440         450
PINFES TTGATGATCACCAGCTGAATCTCGTAGAAAAGCTTGTTAATTCGTTTCAGGTCATGCTTGACATCATGTACAGCTTCAA
      : : : : : : : : : : : : : : : : : : : : : : : : : : : : : : : : : :
HYALO  TTGATCGTCACGAGTTGAGCTCCATCTAGAGGTCCGTCGGTTAGATCAAGGCGGTGTTTCGGACAGCATGAACAGCTTCAA

```



```

      460      470      480      490      500      510
PINFES GTTGC GCAGATCCCATTTTCCACCGTGCTGTTTGT-----TGTAGTT-CTCA-GACGT-----TTTCTGG-----
      :: :   :::   ::   ::   ::::   ::::   :   ::   :   ::   :   :   :   :   :   :   :   :   :   :
HYALO  GTCGTACAGTCTCCGTTTCTCACCATGCTAGTAGTGAGACAGGGATGCAGCGGCACATGATGGGTAAATTTGTGGTGACC

      520      530      540      550      560
PINFES -----ACAGCAACATTC-----GTGAG-----GTGGATGAAAG-----AATTGGCGAT--GTCGCTGTG
      :: :   :::   :   ::   :   ::   :   ::   :   ::   :   ::   :   ::   :   ::   :   ::   :   ::
HYALO  GTACGGGTCACACAATCATTATCTATACAGAGGGAGCAAGCAGAGGGTCAATGTTGGTCAATCGTCCATCAGTCGCTTTG

      570      580      590      600      610      620
PINFES ATTGTTTCGAGTATCGCGAA-----TTGGTGA-AGC-GCGCGAATCCACCGCGGAAA---AGGTAG-----ATTTCA
      :::   :   :   :   :   :   :   ::   ::   :   ::   :   ::   :   ::   :   ::   :   ::   :   ::
HYALO  CAGGTTTAAA-AGCTTGATGCAGGTCTTTCGTACAGCTGCACAAAGC-ACAGCACAAATACAGGGAGTAAAGAATAACA

      630      640      650      660      670      680      690      700
PINFES AGTGGACAGAAGGACGGCAGAGTGCGTATAG--GCGCAGATCAAATTTCTTTCCGCCGACAAGGTACGGGCTTGAGATG
      ::   ::   :::   :   :   :   :   :   :   :   ::   :   ::   :   ::   :   ::   :   ::   :   ::
HYALO  AGATGATCGAATGTCAGT-CGCTAACATATAGTAGCGC-----TACCTATCCGCCGTTCCGATATTGGCTCTTGCCG

      710      720      730      740      750      760      770      780
PINFES TAGCGCTGCACGACGTACGTCTCTACCTGTTGATTTTCGGGCCGCCAGCGGAAATCCGTGCGCCAGTCACTGATTTGGCT
      :   :   :   :   :   :   :   :   :   :   :   :   :   :   :   :   :   :   :   :   :   :
HYALO  T----CCACCCACG---GTATCTA---GTTGA---TCACAACACAAACGCA----CTTGCG---GTCA---ATTTAGTA

      790      800      810      820      830      840      850
PINFES CAGCT----TCGTAAACAGGAAGATGCCTTTACCTTGTGCTTTTCCAATGGGCTTCATGATCCAAACGCCCTGGTTGCGC
      ::   :   :   :   :   :   :   :   :   :   :   :   :   :   :   :   :   :   :   :   :   :
HYALO  CAAATACCGTCGTTCTC-GATTGATTCGTTTCGGCCCGTGACGCAGCAATGCATTTTCAT-ATA-AATTGCCAAAG--GCGA

      860      870      880      890      900      910
PINFES TTGAACTCTT-----CGACA-----AAAATGGCATACT-CGCCCCGTA--GAA----TGTA-CGTGGCAGGAAA--
      :   :   :   :   :   :   :   :   :   :   :   :   :   :   :   :   :   :   :   :   :
HYALO  TAGCATTCTTTCAGATCCGACGGAATCTCAAAGCTCATATTGCGTCAGGCATCGAACACATGAAGCGTCGCTGAAATAC

```

```

          920          930          940          950          960          970          980
PINFES  GAAATCGTACGAGCCCAGCGCCGA---GTC----AAGCTCACTTAATGTTGCAT--CA-TCC-GACCTCGCCTTCTTGTC
      : : :  ::::  ::  : :  :::  :::::  ::  : :  ::  ::  :::  ::  : :  ::  :  :  :  :  :  :  :
HYALO   GCATTAATACGCCTTCACTTCTGGACTGTCTACAAAGCTC-CT--ATATTCCATTTCACTCCAGAAC-CACCAT-----C

          990          1000          1010          1020          1030          1040          1050          1060
PINFES  CATTTGTCGCTTTGCTCGCTTCAGGTTTTTAATGAGCAGATCTTTCCGACACAACCTCTCT-TCCATTTGATAATGATTC
      ::::  :::  :  ::  :  :  :  :  :  :  :  :  :  :  :  :  :  :  :  :  :  :  :  :  :  :  :  :
HYALO   CATTGCTCG--TGA CTGAAAACAACTGTCAGTCA-CACA----TGCGACACAATGTTATGTGTACTT-GACAC-----C

          1070          1080          1090          1100          1110          1120
PINFES  ACCCGTTGGCTGTTCTCGAG--GTGCACAGTATCCAAAAGCTCG----TAGATATACTCG-----CGG----TCAGCCCA
      ::::  :  :  :::::  :  :  :  :  :  :  :  :  :  :  :  :  :  :  :  :  :  :  :  :  :  :  :
HYALO   ACCCATAAAC-GTTCTCGGGTCGGGCGCTGCACCACTAAACTCGGCATTCGAGA-AGTCGAAACCCGGATTCTCTTCCTG

          1130          1140          1150          1160
PINFES  GTAAAAGTCCCAG--TCATTCTCCGTTGTCTCCTTCC
      :  ::  :  ::::  ::::  ::  ::  :  ::  :
HYALO   G-AAACGCTCCAGCATCATTTTCTGTTTCGTGCTTTC

```

---

PITG\_0942

Waterman-Eggert score: 492; 53.8 bits; E(1) < 1.9e-10  
62.0% identity (62.0% similar) in 371 nt overlap

```

          30          40          50          60          70          80          90          100
PINFES  TGGAGCAGTATGCCGATTGGTTGGATAATTTGGAGAAGACGGATCCGGAAGGCTACGAGCAGTTTATTGCCACAATGCAG
      : :  ::  :  :  :::  ::  :  :  :  :::::  :  :::::  :::  :  :  :  :  :  :  :  :  :  :  :
HYALO   TGCTGCGCTATTC--AGTGGCTGAACGAGTTGGAGCAAACGGATCCAGAAGGTTATCAACACGCTCTTGCGACGTTGCAG

          110          120          130          140          150          160          170          180
PINFES  AGTCAACTGCAGGCCCGCAGGACTGGGACCAGAGAGCTCCGCTGGTGCACCACAAGGTGACGCAGATGTAGCATTGCTCGA
      :::::  :::  :  :  :  :  :  :  :  :  :  :  :  :  :  :  :  :  :  :  :  :  :  :
HYALO   AGTCAACTGCAGTCTACTGGATCAGGGCTAAATGACGGTCCTAGAATACCAAAGGTTGAGCAAATCGATCGCTGCTGCA

```

```

190      200      210      220      230      240      250      260
PINFES CATGCTAAAGAGCTCAGCAGGTGGA-CGAGGAGGGGCCGCCGACACCATC--TCGTCT-GATTTCAAGCCGCGGTTTCCT
      : : : : : : : : : : : : : : : : : : : : : : : : : : : : : : : : : : : :
HYALO  TATGCTCAGTAGAT-AGCCCTTGCAGCTATTGATGATTGATGATATTTGGGTTGTCTAGAGTTCAAGCCTCGGTTTTCT

      270      280      290      300      310      320      330      340
PINFES GGTGACAAGATTATGGGGAATGATGGCTTGAAAGCCACTCCAGAGGGGGTGTACATTGATGTGAAGCCTGGCTTCGTCAT
      : : : : : : : : : : : : : : : : : : : : : : : : : : : : : : : : : : : :
HYALO  GGTGACAAGATTATGGAGGAGAAGGGCTTGAAAGCCACAGCGGAAGGGT----ATGAGTGTTAA-CGTGGAGTGCTCAA

      350      360      370      380      390
PINFES GAAGACAACCGATGTTAAGAACAAAAAGAAG-GTT--TTTGTAATGTAGT
      : : : : : : : : : : : : : : : : : : : : : : : : : : : : : : : : : : : :
HYALO  GCAGTAAA--GGGGTCGTCGACAGAGAGCTGAGCTAGTTTGTA--TGTTGT

```

---

PITG\_12763

Waterman-Eggert score: 472; 50.8 bits; E(1) < 3.1e-09  
51.6% identity (51.6% similar) in 1430 nt overlap

```

      10      20      30      40      50      60      70
PINFES TAAGAGCGCGAG-TGTTTGAGT-GCTGCTGCC-TCCGGATTGAATTCTGGAGTCTCTATAAACTGCAGAAAGAGGTTTGT
      : : : : : : : : : : : : : : : : : : : : : : : : : : : : : : : : : : : :
HYALO  TGAAAGCACGAAATGTGCGGATAGGTG-TGCCGTCTGGATCCGACCATAGTGTCTCGCTAAATTAAGCAAGCGCTTCCA

      80      90      100      110      120      130      140      150
PINFES GAGGCGTTTGCCTAGCCCTCAAGACTCTTCTCCTTCCGTCCACGACTGAGCATATCCGCCTCACGGTCAATAAGCTCCA
      : : : : : : : : : : : : : : : : : : : : : : : : : : : : : : : : : : : :
HYALO  -ACCCTTTTGCATAACGCCTCACGACTTTTCTCCGTGCGGCTGCAGCTCGGTGTGTCCACTCTAAGGTCGATGAG-TCGG

      160      170      180      190      200      210      220      230
PINFES CTAGCTCTCGAGTGAGAGCACAGTCGAACTCTTGCACTGTCCACTTGATATGCAGCAACATGTCCAAGCGTTTCGTCCACT
      : : : : : : : : : : : : : : : : : : : : : : : : : : : : : : : : : : : :
HYALO  C--GTTTTGGA-----AATAAAGTGG-----TCAGCTTAACATGAGGCAGCATGTCCAAGAG---GTACAAC

```

```

240      250      260      270      280      290      300      310
PINFES  GAACTGAGTGGTGTACGTAGACCAT---GGTACAGATCCGTGAGCTCTTTGGCGCGAACAGTGAACGGTGTGTGCACCTC
      :  :  ::  ::::  :  ::::  ::  :  :  :  ::::  ::  :  ::::  ::  :  :  ::::
HYALO   TACATCAGCGGTGTCCACGGACCATATTGGCCAATCTTCATGAGCTCCTTCACCTGAACAGT-AAGGGCGGGTGCAAGCT

      320      330      340      350      360      370      380      390
PINFES  TTTTACACCTCCGTCACCTCATCTCCCACTGCTTCGGACGTGCCATAAACTG-CAGCATGGCTTCAATACGTTGCTTACGG
      ::::  ::::  ::  :  ::::  ::  :  :  ::  ::  ::::  :  :  ::  ::  :  ::::  ::
HYALO   TTTTATTATACCGTC-CTTA-----GATGTACCATAGATTTACAATTTGG-----GCTGCTTACGC

      400      410      420      430      440      450      460      470
PINFES  TTGGCCTCTGTTGCCGTTAACTTG-AGTCTGTCAATCGTCTGAAGCAGTTTGGTCTCTTTGGCCAGAATGGCGTCAAGAG
      ::  :  ::  ::  ::  ::  ::  ::  :  ::  :  ::  :  ::  :  ::  :  :  :  :  :  :  :  :  :
HYALO   TTG-CATCCGT-GCCCTTAGCTTGGATTCTGAAAGACCTC--AAATAATTCAGTC---TTGCTC-----CATCACGTG

      480      490      500      510      520      530      540
PINFES  CGTCCTGTCTCTCGGACGGATCCAGTTCTCGTTGCTCACGAACTTTCCGACATTCAAC-CTG--TCGCCATTTTTCG---
      :  ::  :  :  :  :  ::::  ::  :  ::  :  :  :  :  :  :  :  :  :  :  :  :  :
HYALO   CACGCTGCCATTACCCAGATCCATCTCGTCTGTTTGGACACCTTGCGGCA--CAACTCTGGATTGGCACCTCTGGCTG

      550      560      570      580      590      600      610
PINFES  -AGTTCATTGTAGAGAATCTCAAAGTCACTCACCGTGTTGGGTGCAT-GCG-----ACGGTTGACTTCACGACGT-TGA
      :  ::  :  :  :  :  :  :  :  :  :  :  :  :  :  :  :  :  :  :  :  :  :  :
HYALO   GAAATCCTATTCGCCTCTGTGACCGCGATCGCAATGCTTATGAAAATTGCGTTATTACGCCGAGCTCATTACGCGTCA

      620      630      640      650      660      670      680      690
PINFES  CGACTCACGTCATCAGCGTCGTTCTCTTGGGCTTCGATCTCTGCGAGTGTACTIONCACACGACGACGCTGTTACGTATACT
      :  ::  :  :  :  :  :  :  :  :  :  :  :  :  :  :  :  :  :  :  :  :  :  :
HYALO   CAACTGCTATGAAAAGA-TC--TCACATAGACATCCAGATC-----GTACAACCAAACATCG--GTCGTGCAAGGTGAC-

      700      710      720      730      740      750      760      770
PINFES  AAAGACGTAAAGTCGAGCGCGAAACCCGC-----GCCACAGACGCTGCAAGAGAAGCACAGAGTCTTCTCGTAGACTGTG
      :  ::  :  :  :  :  :  :  :  :  :  :  :  :  :  :  :  :  :  :  :  :  :  :
HYALO   -ATGAC----AATTGATCACTCGTCTGGCCTTTGGCCATT-ACGCAGCTATGGTAGCTGAGTCTATTGCCTTACAAAAGC

```

```

      780          790          800          810          820          830
PINFES TAGTTGGTA-----CGAATCAAAG--TAAGGA-TGTGCAGTTACG-----TGGCGATCGAAGGACTCGTCTAGCTTA
      :   :   :   :   :   :   :   :   :   :   :   :   :   :   :   :   :   :   :   :   :   :
HYALO  AACATAGCAAATACCCGGCCCCGAGGCGTAAGGAATGCACAGCTACGGGTTTTCTGGCG-TCGATAGGGTCGAC-AGCCCA

      840          850          860          870          880          890          900          910
PINFES AGATCCCG---TCGAGACATTTGAGTGCCGGACTCCCGGTGGGTCTGCAAGGAGCGCGTACAGATTGCTGTGTTTGG-G
      :   :   :   :   :   :   :   :   :   :   :   :   :   :   :   :   :   :   :   :   :   :
HYALO  ATACCAAAGCTCG-GCAATTTTCATTCATGGAAGAC---TGTGT-TGCA---GTTGTACACTATGTGCAGCATTTTATG

      920          930          940          950          960          970          980          990
PINFES TCTCGC-GGTGGAAACGTCCCGGACCCATATTGTGACGCGCTCGTGATAAAACAGTCTGAGTGGAGGCGTGATGAAATTG
      :   :   :   :   :   :   :   :   :   :   :   :   :   :   :   :   :   :   :   :   :   :
HYALO  TGTCGCTGGTGCAA---GCAGTAGCTCTAAGGCGCGCGATCTTGCGAGACATA-TGTCGGTAAAGGCAGCTGGATATCG

      1000         1010         1020         1030         1040         1050         1060
PINFES TTGTAGCGTTTTACG---GTGTTTGAAGCCTCCGAGGTACAATTTGTGGCCTGT---GAACTTGTC--AAT-----CTCA
      :   :   :   :   :   :   :   :   :   :   :   :   :   :   :   :   :   :   :   :   :   :
HYALO  CTAAAAAGAGGTATGCAAGCGAAGGCGGCGTC-GACTTACCTTCTGCGTCGTTCAAAGAACTTTACTGAATGGCGACTAC

      1070         1080         1090         1100         1110         1120         1130
PINFES ACGGTTAAAATACTGGTACTTTCGGTATCC-----TCATTGTAAACCTGGA---CTTGTATCCGGTCTGGCATGACGTAG
      :   :   :   :   :   :   :   :   :   :   :   :   :   :   :   :   :   :   :   :   :   :
HYALO  ACGGATTTGCTA----TACATTC---TTCCATTGGTTACTGCAAACATGAAAGCCCACTAAGTTGGCAGTCAAG-CGTAA

      1140         1150         1160         1170         1180         1190         1200
PINFES CTGCTTGTGGTGGCTGGTCTGGCGACGTAAGCTTCGAGAGTGCATTCCGAGTTGCCATTAGGTAATCCGT----ACG---
      :   :   :   :   :   :   :   :   :   :   :   :   :   :   :   :   :   :   :   :   :   :
HYALO  GAG-TTGGTATCGTTGAG--GTCGAAGTAAGGTGCGGCTTGGCACAACGTTTTCTCGTAGATGATCTATCTGAACGAAG

      1210         1220         1230         1240         1250         1260
PINFES -----CTGAAAGCGGTAGATTTTCCCTCTTTTGCATCGCTAA---GAC--CATGGAGATCGGG
      :   :   :   :   :   :   :   :   :   :   :   :   :   :   :   :   :   :   :   :   :   :
HYALO  TCGAGTAGATATGAGTACTAATAG-GGTATATTTACGCACACTTGATC-GAA---CTAATCTGGCGTCACGCACTTCGTA

```



```

          400          410          420          430          440          450          460          470
PINFES TC--G TTCAGCTGCGCTGCGAGCTCGAGTTTTTCCTTCCGAAGCACGAAGTGCGCGTCAATAGCGCCGAAGTAATCAGCT
      :: : ::::: ::::: ::::: :: : ::::: :: : : ::::: : : : : : : : : : : : : : : : : :
HYALO  TCCC GATCAGCTAGGCTGCATGCTCGATGATT--CTTCCATAGAGCAAAGTGCGCGTCAATATCACCTGAATAGTT-GAA

          480          490          500          510          520          530
PINFES AGCGGCAGTGGCTCCTGGTAGAACACCT-----CGAGA--GCCGTGGCAGTTCCAGCGTCGCTTCCTTTG
      :: : ::::: ::::: : ::: : :: : :: : :: : : ::::: : : : : : : : : : : : : : : : : :
HYALO  AG-GTTTGTGGCCACTGGCAAACCCCTGTGTGCGGGCTTGAACGAGACAGAATTGTCACTTACAGCCTAAC--CATTCA

          540          550          560          570          580          590          600          610
PINFES GCCTCTGTGTGCAGTTCTTGTCCGTCAAGAATGCACGAAGTCGTGCCACTAGTTCC---TGCGA--CACCATCCAGAGC
      :: :::: : : : : : : : : : : : : : : : : : : : : : : : : : : : : : : : : : : : : : : : :
HYALO  GCTTCTG-----CTCGTCAAACGACAAAGGCAAGGAG-----CACTACTACCCATTGTGAATCACAATGCACTCC

          620          630          640          650          660          670          680
PINFES GCCTCGAGCTCGTTAGACTGGATACGATAGCGTCCGGCATTCTTCGATACGAGGATTGTCGCCTCGACGC---CGTTAT
      :: : : : : : : : : : : : : : : : : : : : : : : : : : : : : : : : : : : : : : : : : :
HYALO  CTATC---CTCTGCA-ACTGGA-ATCATTG-----TCTTAGAC----GCATTGTTGCTTC--CGCATCACTTTCT

          690          700          710          720          730          740          750          760
PINFES AGTACTGAAAACACTCAGTACATTTGTGCCGAGCCTCCTGTCACTACCTGCTTCGCCCACTCGGGCGTGCAACTTGGCTGA
      : : : : : : : : : : : : : : : : : : : : : : : : : : : : : : : : : : : : : : : : : :
HYALO  -GACCAGAGAGCTGA----ACTTGTTTTAGGTTCTCCCGCTACCACCGAATTTGCGTACTCTGATGTCCACCT-----

          770          780          790          800          810          820          830          840
PINFES TGGAGCATGTCTTCAAACAAACTAGCAAGTTCAAGAGGCTCCTGGTTTGTCTCGAGAGTAAACTTAAAGGTACTGGACTT
      :: : : : : : : : : : : : : : : : : : : : : : : : : : : : : : : : : : : : : : : : : :
HYALO  ---AGTTTGT----AAACAT-----GTTGACCAGTCATTTGCTT-GTCCCCTACCTG--CTTAAAGTG--TGAATGT

          850          860          870          880          890          900          910          920
PINFES GACGGGAGGGACGAGGCGACATGCCATGCACATGGGGAGCTTCAACGCCTGCGAGACCCTCGGCTGGCCTGT-CTCG
      : : : : : : : : : : : : : : : : : : : : : : : : : : : : : : : : : : : : : : : : : :
HYALO  AATGGTAAA-----ACGTGCAATGC--ATG-----TTC-----TGGCCTGTACACG

```

930            940            950            960            970            980            990            1000  
 PINFES AGTGTGTAAGACGCTGAGATTGTAACGGAGAGCGACGTAGGCATGGCGTCGGAACCTGGACGTAAGACGACTGGGATAAT  
       :    :    :::   ::    :::    :::    :    :    :    :    :    :    :    :    :    :    :    :    :  
 HYALO ACACT---AGAC-CT---ATAGTA---GAAAGCTAAGTGGATATGGCGTCGGGAGATGAA-----

1010            1020            1030            1040            1050            1060            1070            1080  
 PINFES AAGCGGCGTCGATGCCTTGCCGTCGATACTCCCGATCACGAA--CGAGGAGTCACTAGCCACGACATTCTCGGGTGTCTCGA  
           :::   :::   :   :   :   :   :   :   :   :   :   :   :   :   :   :   :   :   :   :  
 HYALO -----GTCATTGCAGTACCATCAAAATTCCCGATTTCATATTCGAGA--TCGATTACCACGTCATTCGCCAGCCCTGA

1090            1100                    1110            1120            1130            1140  
 PINFES CACCGACAGCGTCACATTGG-----AGACACGC-GTTGCTCCAGTGTACGTGACGTACACGCGCATTGT  
       :    :   :   :   :   :   :   :   :   :   :   :   :   :   :   :   :   :   :   :  
 HYALO AA-----AACGGGCCGTTGGTAACCCAGACACTAAGTAGCACCGGT-TATTCCGCGTACGGGCGCATTAT

PITG\_2021

Waterman-Eggert score: 494; 112.8 bits; E(1) < 8.8e-27  
 53.5% identity (53.5% similar) in 1597 nt overlap

3130            3140            3150            3160            3170            3180            3190            3200  
 PINFES TGGAGCATGAAGGCAACTACAAGGAAGCAGAACACCACCTTTGCTGAAGCTGGAGAGTGGCAAGC---TGCTGTCAACATG  
       :   :   :   :   :   :   :   :   :   :   :   :   :   :   :   :   :   :   :   :   :   :  
 HYALO TCGAAGACGAAGGTAGTAACAAATAAACTAAACATCATTTAAAATGGAGCTGGTGTAGTGGACGGCACCTGCAGTTATCATG

3210            3220            3230            3240            3250            3260            3270  
 PINFES TACCGGACGAACGATATGTGGGATGAAGCGATTTCGTGTT---GCCAAGTTCCACGGC--GGGATC---AACGCCTCGAAG  
       :   :   :   :   :   :   :   :   :   :   :   :   :   :   :   :   :   :   :   :   :   :  
 HYALO TACCGAACCAGCGAAACGTCTGTCTGTAGTGTGACATTTCAAGGCATGTGCTTGTGCATGGGCTTTGGAACATGAGGAAA

3280            3290            3300            3310            3320            3330            3340  
 PINFES CGTGTG-GC--TTATGCTTGGGCCATGGATCTCGGAGGTGAACAAGGCGCTAAGCTGCTCACTCGTC-----TTGG  
       :   :   :   :   :   :   :   :   :   :   :   :   :   :   :   :   :   :   :   :   :   :  
 HYALO TCTGGGTGCCATTATCGTAGGCTCATTGAAC-CGGCGATCTACTGTGTATTGTCTGAGCATTCTCCGAATAACGTTTCGG



```

      3350      3360      3370      3380      3390      3400      3410
PINFES ACTCATCGAGCCGGCAATAG-----ACTACGCTATTGA--AAGTGGAGCGTTCGAGCACGCCTTCGAGCTTGACGC
:   :::  :  :   ::      :   :   :   :   :   :   :   :   :   :   :   :   :   :   :
HYALO  TCCGTTTCGCACCACCTTTAGTTGCAGGCACGGGCAAAAAGAGCAAGTGGCGCTTGTGAGCACGCCTCCCAACTTGCGCA-

      3420      3430      3440      3450      3460
PINFES AATTGTGCCACCAAA--AAGCTACCGG-----AGGTGCATC-----TCA-----AACATGCGCTGTTTT
::  :::::  :::  :  :::::  :      :  :  ::::  :   :   :   :   :   :   :   :   :   :
HYALO  AAGTGTGCT-CCATACGAAGCTGCATATATATAGATTCATCATTAGCATATATAGATTCATCATTAGCATACTTGATCA

      3470      3480      3490      3500      3510      3520      3530      3540
PINFES TCGAGGATGAGGAACGCTTTAAGGAAGCAGAGGAAGAGTTCATCAAGGCTGGGAAACCTCGTGAAGCGCTGGACATGTAT
:  :  :  :  :  :  :  :  :  :  :  :  :  :  :  :  :  :  :  :  :  :  :  :  :  :  :  :
HYALO  TGGACGGCGGAGAGGACTGTACGGGGGGCGGCTGGAAATTAATAAGTCCGAAAAATGACG--GAGCCCTGGGCGTGTAT

      3550      3560      3570      3580      3590      3600      3610      3620
PINFES GTGCACCAACAGGACTGGCAAACGCCATGCGCGTCGCGGAAAGCGCGGACCCGGCGTCTGTGGCTGACGTGTTTCATCGC
:::~  ::  :  :  :  :  :  :  :  :  :  :  :  :  :  :  :  :  :  :  :  :  :  :  :
HYALO  ATGCAT---CAGTACAGGTAATTC-CATTGTATGTCACCGGAAGCGCCGATTCTACACAA--GGTCGATGTATT-ATAGC

      3630      3640      3650      3660      3670      3680      3690      3700
PINFES TCAAGCGAGACTCTGGATTGAGCGCAAGGAACATCAACGTGCTGAAGGCTTCTTCCTCAGTGCCGGGAAACCAGAGCTGG
::  ::::  :  :  :  :  :  :  :  :  :  :  :  :  :  :  :  :  :  :  :  :  :
HYALO  TCGAGCGTGACAGCGGATCAGGCACAAGGTGCGTGTGTTG--GAAGG-TCTTTCTTCAGTGCAGGCAAGC-----

      3710      3720      3730      3740      3750      3760      3770      3780
PINFES CTCTTGCCGCGTATCTGGAGGCTGCGATGTGGGCTGACGCAGTGCGAATTGCTAAGCGGCATCTTCCTCATAAGCTCATG
:  :  :  :  :  :  :  :  :  :  :  :  :  :  :  :  :  :  :  :  :  :
HYALO  -----GC-TATCTG----CCCCGATA-----GATACAATGC-AATTACTACACG-CACAATTCGCCGACG----TC

      3790      3800      3810      3820      3830      3840      3850      3860
PINFES GAGGTGAATATGGCTCATCAACGCGCTATCTTCTCT--GGAGGACCGAAGAAGAAAGAA-GAGCTCATGGAGGCGTGTGAG
:  :  :  :  :  :  :  :  :  :  :  :  :  :  :  :  :  :  :  :  :  :
HYALO  GAC---AATAT---TTATAAGCGCACCATCTTTTATAGGCGTGTGTAAGGACAAACAATGAGCTCATCTTGACG-----

```

```

      3870      3880      3890      3900      3910      3920      3930      3940
PINFES ATGTGGGTGGCCTCGCAGCAGTATGTTTCAGGCAATCGACGCGTATTTGTCGATTTCTATTGACCAGATCAGCGACCTTGG
      : : : : : : : : : : : : : : : : : : : : : : : : : : : : : : : : : : : : : : : : : : :
HYALO ATGTGGGTATCTTC-CAGTAGCTTGTCTAAGAAC-----CGCGCACCCGTCG-----AATGTCC-GTTCACTGACCTCGG

      3950      3960      3970      3980      3990      4000      4010      4020
PINFES AGAGCTGGAAGAGCTCTGGGCGAAGGCCATCGA-GCTGTGCGCTAAGCACGACCCGAGTCGCTACAAGTCGATCGTGGAG
      : : : : : : : : : : : : : : : : : : : : : : : : : : : : : : : : : : : : : : : : : : :
HYALO GGAGC-GCAAGTGATAGTTGCAAAGGCTACAAAAGCTGTATG--AAATATAA-----TATAAGTTCTTTGTCGAA

      4030      4040      4050      4060      4070      4080      4090
PINFES GAGGTGGCGTCACGCCTCCTTGAATGTCTCGCTTCGACTCCG--CTGCTGAGCA---TTTCCAGTCTATTGACAAGATG
      : : : : : : : : : : : : : : : : : : : : : : : : : : : : : : : : : : : : : : : : : : :
HYALO AACGTGGCTT--CGCAACTTTCACACGCCTCGCCTCGATACGGTGCCGCTCGGTAATTTTTCAAATGTACGGACCAAGAG

      4100      4110      4120      4130      4140      4150      4160      4170
PINFES AACGAGGCCCTGGATTGCTATCTGCGCGTCAATAACTGGGCTGCCGCTCAGAAGCTGTGCGAGCAGCATGCCCCCGAGCT
      : : : : : : : : : : : : : : : : : : : : : : : : : : : : : : : : : : : : : : : : : : :
HYALO AACGCCGCTCTGGACTG-TAATTTTCGC-TTCACAGTTGAACAACAGCTCA-ATACTGTCTCAACAGCATGAGCCAGCGTT

      4180      4190      4200      4210      4220      4230      4240
PINFES GTTACCTCGTCTCGAGCGAGCACAACAGGCTAGTGCCTTTGG-ATCAGCTTCGCACCACC-----CTGCAGAGGCCA
      : : : : : : : : : : : : : : : : : : : : : : : : : : : : : : : : : : : : : : : : : : :
HYALO CTTCAGT-GTCTCAAAATA--AGGAAGAACCAGTGCTCTTGATAACATGCTCTCCCGACCGTCGAACTCTTCACTCGTCG

      4250      4260      4270      4280      4290      4300      4310      4320
PINFES AGAT---GGCTACAAGCTCGTACACTCCGTCAGCAGATACCAAGATGCACTACTCTGCAGAGAAAAAGGAGTCGACGCT
      : : : : : : : : : : : : : : : : : : : : : : : : : : : : : : : : : : : : : : : : : : :
HYALO ATTTCTCCGCCCAGATGGTCGTACACCCATTCGTCCATTTCTCAG-TGCGCTTTACTTCGGAAAGGTAAATGTCCGGAGCT

      4330      4340      4350      4360      4370      4380      4390      4400
PINFES CAGTGCTGAAGGTGATGACGCAGGACGCGGTACTAATGCTCTGGATGCGTGGATGCAGCGTGGGGAATGGGACAAAGTGT
      : : : : : : : : : : : : : : : : : : : : : : : : : : : : : : : : : : : : : : : : : : :
HYALO CCGTGCTTGCGGGTGCAGATGGGTGCGACAGTACCACCCTTGATGCATGGATGCAGTGTG----ATGGGTCAACTTCT

```



```

      420             430
PINFES AGTT----GCGTAGCAA
      ::::      :::::  ::
HYALO  AGTTTGCCGCGTACCAA

```

gap....

Waterman-Eggert score: 138; 34.1 bits; E(1) < 0.0043  
 56.6% identity (56.6% similar) in 279 nt overlap

```

      2680      2690      2700      2710             2720      2730      2740
PINFES GAGGCTGCACTTAACCTCACGACAATGGGCTAAGGCCAGTCAACTT-----GTAGAGACAC-TGGAGGACGATGTGTCTCT
      :: :: : : : ::::: : ::::: : : : : : : : : : : : : : : : : : : : : : : : : : : : :
HYALO  GACGCCGATCCTCACTCAAG-CAATGGTGTGCATGTCAACTAACATCGCCGGTCGTGACGCGTTAAGGCCACTG---CACT

```

```

      2750      2760      2770      2780      2790      2800      2810      2820
PINFES ACCATACTACCGTCGCCTTGCTCGTCAC----TACCAGGAAGCAGGCAATCTAGAGCAGGCTGAGCGATGCTTCATCAAG
      :: :::: : : : : : : : : : : : : : : : : : : : : : : : : : : : : : : : : : :
HYALO  TCC-TACGACTGT-GAAAAGCTGAGTACATTTTTATAAGATGCAAGTAGTCCTGAGCAGGCTGGGCGTCGATCGAAGA-G

```

```

      2830      2840      2850      2860      2870      2880      2890
PINFES GCGGACGCTGCTCGTGATGCCGTGAGATGTACTACTCGAGCCAACAAAATGGGA-TGCTGCC--TACCAGGTCGCACTCA-
      :      : : : : : : : : : : : : : : : : : : : : : : : : : : : : : : : : : :
HYALO  GTATTTGCCACTCACGACGCTGTTG-GATGTGCACACGTGCCGATAAACAAGAATGCAGTCAATACATATACGAAAGCAC

```

```

      2900      2910      2920      2930
PINFES -ACCACTTGATAAAT-ACGAGACCGAGA--GACTGTAC
      :      ::::  : : : : : : : : : : : : : : : :
HYALO  GATGACTTCACTAAGTCACGAGCACCAAATTGATTGTAC

```

gap....

Waterman-Eggert score: 119; 29.9 bits; E(1) < 0.076  
 60.2% identity (60.2% similar) in 118 nt overlap

```

      2140      2150      2160      2170      2180      2190      2200      2210
PINFES ATGAAGCT-ATTGAGATGT-ACCAGCACTTGACAAAATGGGAAGATGCTATCCGCGTTGCTGAGACGAAGAACCATTCCG
      ::::  :: ::::: : : : : : : : : : : : : : : : : : : : : : : : : : : : : :
HYALO  ATGACACTGATTGTGTTATCACTACTACGGACTCAATTTGCAAGATATTGCACGCATACCTCATACGACTAGTCATCTCG

```



```

1030      1040      1050      1060      1070      1080      1090      1100
PINFES ATT----GGACAAAGAGAAGCGACTTCTGCAGCAACTAGAAAGAAAACTTGAGGGCGAACACACGGCCAAGATCGTGCTG
  ::      ::::: : : ::::: : : : : : : : : : : : : : : : : : : : : : : : : : : : : : : : :
HYALO ATGAATAGGACAACG-GAAGCGACTTT----GCAACAAGAAGCCAGA-----CACTGCAAAGGTCGCGCAG

1110      1120      1130      1140      1150      1160      1170      1180
PINFES CAAACGCAGATCAAGAGCATGCAACACGATCTGGATCAAGACAAGATCAATGAAGACCACACACGAACGGAGTTGGAGGC
  ::: :   :   :   :   :   :   :   :   :   :   :   :   :   :   :   :   :   :   :   :   :   :
HYALO CAAGCTTTTACGAAGGGTACG-AATGC-ATCTTGG--AAAACA-GTTTGGTG-----CGCACGTATGGCGGTG-----

1190      1200      1210      1220      1230      1240      1250      1260
PINFES GTTAGAACGAGAGAAAGCTATGCAAATGAAGCAGACGCTGAAGGTAGAGGGCAAAGTTCGTCGTGCTCAGGATGAGATCA
  :   :   :   :   :   :   :   :   :   :   :   :   :   :   :   :   :   :   :   :   :   :
HYALO -----CACAGAAGGCTATGGAAAACAACCAGACACTGAAGGCAGAAAGCAATGATTGTGCGAGTGTAGGGAG-GATCA

1270      1280      1290      1300      1310      1320      1330      1340
PINFES AGACCAACGAGCGTGTGCGAAAGAACTTGGAGCAAGAGCTGGCAGG--ATT--CAAGCTCGAAGCTGCCAAGCAACGTAA
  ::: : : : : : : : : : : : : : : : : : : : : : : : : : : : : : : : : : : : : : : : :
HYALO AGACGAAAGAGCGTG-CGGTGTGGGCTTTAACCTAGAGTGAGCAAGTTATTGCCGAGCAGGTAGCCAA-AAGCAGCCTCG

1350      1360      1370      1380      1390      1400      1410      1420
PINFES ACTTATCTATCAGCTCGAGAAGGAACGCGAGAAGTATGGCATGGAGGCAGCCGAGCAACGTAAACTCTACTTGCAAGCTG
  :::: : : : : : : : : : : : : : : : : : : : : : : : : : : : : : : : : : : : : : : :
HYALO T-TTATCAAGAACTTTACTCA--AAAGCGGAAAGGATGGTATCGAGGTTGCAGAGCAGCTTGAAACGTG--TACAGTCTG

1430      1440      1450      1460      1470      1480
PINFES AAGAAGAAGGGAAGTTGAAGGAAATGCGAAACCACGACTTGCAAAGAAGGTGCATGAAGGAGA
  :   :   :   :   :   :   :   :   :   :   :   :   :   :   :   :   :   :   :   :   :   :
HYALO A----GAAGCAAATCGAAGGAGGTGCGAGGACATGGCTTGCAAACGAGAGTTCATAAGTGTGA

```

---

PITG\_8038

Waterman-Eggert score: 166; 26.3 bits; E(1) < 0.025

59.0% identity (59.0% similar) in 183 nt overlap

```

10      20      30      40      50      60      70
PINFES TCAATGCCAGCACAAGACATTTCACTTGGCAGTTGTCCATT---CGA-GTCTGCGAGCAGATCGAGAGCCATTTGCAC
  ::: : : : : : : : : : : : : : : : : : : : : : : : : : : : : : : : : : : : : : : : :
HYALO TCACTGTTTAGCGAGGGCCATT---CGTCGCAGCAGTG-ATTACACGACGTCTACGAAC-GGTCAAGAGCCGTTTGCAA

```

```

      80      90      100      110      120      130      140      150
PINFES TGACATGCGTACGCAGTAAAATCTGG--CGCG--ATTTCCATTTTCACTCGAAGTTTCGCCTCGCTAGGCACATTCTCG
      :: :: :::: : :: : : :: : : : : : : : : : : : : : : : : : : : : : : : : : :
HYALO  TGGCACGCGCACGCTGCAAGTGCTTGGTCGCGGCAACTCCCCATTTGAGTC--AGCATCTA-TCACTCAACGCTGTAAAG

      160      170
PINFES CGGAAGAACATGTAGTCGACACT
      :  :: ::::: :  :: :
HYALO  CATTGAGCATGTAGGCATCAGT

```

---

PITG\_12891

Waterman-Eggert score: 291; 39.4 bits; E(1) < 4.6e-06  
54.0% identity (54.0% similar) in 665 nt overlap

```

      20      30      40      50      60      70      80
PINFES TCCACGACTGCTGGACGAGC-CGGGGTGC-CGCA--CTTGTACGTCTACA--GCAGCTTCTC-GATGACGCCGAGGCCCA
      :  :: : :::: : : :::: : : : : : : : : : : : : : : : : : : : : : : : : : : :
HYALO  TACATGCCTGGTG-ACGAGTGCTGGATGCTCGAATGCGTCTTCGTGAACAAAGTAGCGTGACAGATT-CGTCGGGACGGA

      90      100      110      120      130      140
PINFES AGCCGAGACCGAACGCAAGGCCGCGACACACATCCAGCGG-----CTTTTT-----CGAGGACAACGTGTCCG
      :  : :: :  :: :::: : : :::: : : : : : : : : : : : : : : : : : : : : : :
HYALO  AAGCCAGCCATTCAGC--GGACGTTCCACA-ACAGAGCGTATGTGTGCCACCTTTTTTAAACCCAAGCACCGCCAACCGA

      150      160      170      180      190      200
PINFES T-GCTGCTGTCACAGC-----TCAGACA-----GATGCTGAACTCCTGATCTCT--CGTGTGTTCCGAGGACAC
      :  : : ::::: :  ::: : : : : : : : : : : : : : : : : : : : : : : : : : : :
HYALO  TAGTACTGTCACTGAAATCTTCACAAATCTTCGTTAGCGATGCAGAAGGAGCGAACTCTTGCGTGAGTTTTTACAGCGC

      210      220      230      240      250      260      270      280
PINFES CTCGCACGACGACGCTGTAA--TCAACTACGCA-CTG--ACTTGAGAGCGAGCGCATCGCCGCTCAGTATTGGATTACTAC
      :: :::: : : : : : : : : : : : : : : : : : : : : : : : : : : : : : : : : :
HYALO  CT-GCAA-----TGCAAGTTCACTTGCCTTGGTATGTGGATAGATGCCAACATTGG-CAGTCTTGAATTTCTG-

```

```

                290          300          310          320          330          340          350          360
PINFES GCTGTAGTCATCCAGAAACTTGCACGCGGGGTTCAAAGTCGGACACTTCGGCTCGACTTCCGTAAACGGAAAGCTTATGT
      : : : : : : : : : : : : : : : : : : : : : : : : : : : : : : : : : : : : : : : : : : : : : : :
HYALO GCAGTTGACGTCAATAAAT---ACGCG-----CTGAGTAGGACGAA----GTCAACAACAA-AAGCGATGACCTTA--C

                370          380          390          400          410          420          430
PINFES TTTGGAACCTGCAGCCAAAGGAGACCTCATG-CGTCAAATGCTG--GAAGAAAACCTACTTAAGCAA-CAAGAACAGGAG
      : : : : : : : : : : : : : : : : : : : : : : : : : : : : : : : : : : : : : : : : : : : : : : :
HYALO TGACAAACTTACAGCCATGTGAGACGATGTGGCATCGGATGCTGTTGGAGAAATCGCAC--AAGCAAACAGGAGCAGAAC

                440          450          460          470          480          490          500          510
PINFES AAGCTAGACACTAAGAAAGCCGCAAGAGCGGAGCTGGTCAA-AGTC-ACTCAAGA-TCTCCAT-CACTTGGTCAGCACGC
      : : : : : : : : : : : : : : : : : : : : : : : : : : : : : : : : : : : : : : : : : : : : : : :
HYALO AA-CTAGAAAGTGAGAGGGCAGTCAGACTAAAACCTGGTCCCGAGACTAGTCAAGGGTCTGCATACACTA---CA-CACGT

                520          530          540          550          560          570
PINFES GTGCTGTG-----GCTGGCATC-----TTCAACTCGCCCATGCAGGCAGCAAGCGTCACGAGTTTCGGTGTCTC
      : : : : : : : : : : : : : : : : : : : : : : : : : : : : : : : : : : : : : : : : : : : : : : :
HYALO TTACCGTCACCGAGATCTGCAGGCATCGCAATATACAGCTTGCCCATGCAAATATCCACTGTCACTCTTGTGACCTGCC

580          590          600
PINFES -TGTAGAGAGCCACATTCGAGAAAA
      : : : : : : : : : : : : : : : : : : : : : : : : : : : : : : : : : : : : : : : : : : : : : : :
HYALO GTGAAGAAAAC-ATATTCGCGAAAA

```

---

PITG\_13069

Waterman-Eggert score: 138; 24.2 bits; E(1) < 0.084

55.9% identity (55.9% similar) in 211 nt overlap

```

                230          240          250          260          270          280          290
PINFES AGGACACAGAT-TGGATCTATTTAGTGTACT-CGCCCTAGGGTTTAGGTAGAACAGGTGTTTGACGC-CGGTCTTGAG
      : : : : : : : : : : : : : : : : : : : : : : : : : : : : : : : : : : : : : : : : : : : : : : :
HYALO AGGATAGATATGTGGATGTCTTGGA-TGAATTGCGACTTGTATTATTGAGAGGGATTAGG-GCTGGACGAACGGACACGAG

```



```

          300          310          320          330          340          350          360          370
PINFES  GAAACCCATGACAGCACCATC--GTCATCATTGATGGCCAGCAGCAGTGTCTGTTGCTGTTCT-GTTGCTGTGGACGTCG
      : : : : : : : : : : : : : : : : : : : : : : : : : : : : : : : : : : : : : : : : : : :
HYALO  TCGTTCGTTCAAAGCATCGTGAGGTA CTCTATTCTAGTGTTAAACTGTTTTTGGAAATTGTTGACGTTGCTGTGGACTTCG

          380          390          400          410          420
PINFES  CAAAGAGATCGGTGGAGGTGATTTTCATGGGAG-----AGAGTTTGGGCTGT
      : : : : : : : : : : : : : : : : : : : : : : : : : : : : : : : : : : : : : : : : : : :
HYALO  CAAAGAGA---GTTCA---AATTTAGGTTAGTATTCAAAGCTTGGCCTGT

```

---

PITG\_10796

Waterman-Eggert score: 241; 28.8 bits; E(1) < 0.011  
50.6% identity (50.6% similar) in 1369 nt overlap

```

          220          230          240          250          260          270          280          290
PINFES  TCTCGTTGGCAACGCGTTCTTTTTCTCGACGCAGGGCCAACTCGTCCAG---CAGCACCTTGTTGTGTCTCTTC-CAGA
      : : : : : : : : : : : : : : : : : : : : : : : : : : : : : : : : : : : : : : : : : : :
HYALO  TCACGCTGAAACGTGTGCATATGCTGG-CTCAGG--CAATGTGTTGAAGGTTACAGCAGCTC-TTGCGAACTTGCGCCGA

          300          310          320          330          340          350
PINFES  AGAGATCGAGGTATTCCCACT----CGC----TCACAGCGACGCCGTTCT--GCAGTCCT-TG-----TGGCTGGAA-
      : : : : : : : : : : : : : : : : : : : : : : : : : : : : : : : : : : : : : : : : : : :
HYALO  ACACATTGAGGA--TCCTGGTGAGGCGCAACATCAGAGTGTTGCCGTCCTTGGCATTGCTCTGATTACGATGGGCGAAAA

          360          370          380          390          400          410
PINFES  -----GTCGAGCATTTGCAGCGCTTCTTCGTCCTCACGACCGGTTTCTGTACGCAT-----CGCTA-GTCGTACAGTTT
      : : : : : : : : : : : : : : : : : : : : : : : : : : : : : : : : : : : : : : : : : : :
HYALO  AATTGGCAGTGAAATGGCAATGCG--GTCGTT-TGACCACTTGCTGCAGTACGGTGAAGTGGCGGTACGCCGAGCAGTGC

          420          430          440          450          460          470          480          490
PINFES  CTGTAAGTTCGTTTCGCT-TCCTGTTTCGTCGGCCAACGTCGACTG-GTAAA-ACGGAAGCACGCGCTCTCGCTCC-----
      : : : : : : : : : : : : : : : : : : : : : : : : : : : : : : : : : : : : : : : : : : :
HYALO  CTCTGG---CATTTGCTCTATTGAGCGT-GTCCGA--TC--CTGAGTACGCACTGATCGACACGCTGTCGCGCCTGACCC

```

```

                    500          510          520          530          540          550
PINFES -----GTCTCCAGT-TTGCGTACAA-GTTCTCCAAGCTGCAGGATCCGCTCGCTCAGCTG---CAAATGAGCGTCCA
      :  ::  ::  ::::  :  ::  :  :  :::  :::  :  :  ::  :  :  ::::  :  :  :::  :  :  :
HYALO  ACGATGTTGACTCGGGTGTGCTCAGAAATGCTATCCTCGCT-CTCGGTCTGGT--ATCAGCCGGCACGAATAACTCGCGA

                    560          570          580          590          600          610          620
PINFES GTTTCTTGGAGGCTTCGCGAGCT--CCGTGCGATAGCCCTGCGAGTCGACG-----TCGCTGGTCGTCCCGCATGCGG
      ::  ::  :  :::::  ::::  :  :  :  ::  :  :::  :  :  :::  ::  :::  :::  :::  ::
HYALO  GTGGCTGGTTTGTCTTCGCCAGCTTTCGGAGTTTTATAATCGTGAGGCAAACCATCTGTTCGTTGTGCGTATCGCACAAGG

                    630          640          650          660          670          680          690          700
PINFES TT-----CATTTTGGCTTTGAGCGTCTGAAATGATGCGAGATCGCCGCTTCTCCTCTTCTAGCGCCTTGTTACGCTCC
      :  :  :  ::  :  :::  ::  ::::  :::::  ::  :  ::  :  ::  :  ::  :  ::  :  :  :  :  :
HYALO  CTTGCTGCACATGGGCA---AGGGTCT---AATGACGC---TGCACCCGTT---CCACTCGGACCGATTGATCATGTCTC

                    710          720          730          740          750          760          770
PINFES GAGCACTCGCGTACA----TTT--TGAGCGATCTT---GGTCCTCCAGA---GCGCCAGACTCTGTTGCAGACG-CTCAA
      :  :  :  :::  ::  :::  :::  ::::  :  :  :  :  :::  :  :  ::  :::  :::  :  :  :  :
HYALO  GTG---TGGCGGTGAGCGGTTTGTGACAATTCTTACGCTTCGCTAGATATGGAGCATACTATGTTGGACACTTCCCAC

                    780          790          800          810          820          830          840
PINFES TCT-TGCGGATCTTCAGCTCGATATCACGGGACAGATCC--TGGTCCTTCGCCGTCAGGTACTTGAAGTCCTGTGTGCG
      :  :  :  :  :  ::  ::  :  :  :  :  :  :  :::  ::  :  ::  ::  :  :  :  :  :::  :  :::  :  ::
HYALO  TATATTCTGTACTGCATTGCTACAGCAATG--CAGCCCCGTATGCTCATTACGCTTGA-----TGAGGAGCTGAATCCG

                    850          860          870          880          890          900          910          920
PINFES CTGA---TCTGTGTTCTGCAGGTAGTTGAGATGCGCCGCTCGAAGTGTTGCTCTAGCTCCTCAATGCTACTGTCCAAGG
      ::  :::  :::::  :  :  :  :  :  :  :  :  :  :  :  :  :  :  :  :  :  :
HYALO  CTTCTGTCTCTGTTC-----GAGTCGGCCAGGCGGTACGTATT-----CACTTCATTGTAGCGATCTTGAT

                    930          940          950          960          970          980          990
PINFES TG---ATCCGCAACACGTTGATGTCTTCCAGATTCTTGTTCGG---ATCTCCTCTCGAAGCTGTTTCGTGCTCCTGCTT
      :  :  :::  :::  :  :::  :::  :  :  :  :  :  :  :  :  :  :  :  :  :
HYALO  TGGCCATCAGCA-CTCGT-----TCTAACAT-TTCTTGCTTCGGTGTAATCGCAGGTTGAAATTGTCGG----CCAGGCT

```

```

1000      1010      1020      1030      1040      1050      1060      1070
PINFES GGCCTCGGCCTCACGCTCCTTC-----TCCTGCTG-ATCTACCGCCTGCATGATGCGCTGCAGCTCGTTACGCTCCATGG
      :::  ::  ::  :  ::  :  :      :::  :  :  ::  :  :::::      :::::  :  ::  :  :  ::
HYALO  GGC--CGCCGAAGTCTATTACGGGTTTCCAGACGCATACAACGCCTGT-----GCTGCTGAATGTAAAGGACC----

      1080      1090      1100      1110      1120      1130      1140
PINFES TGTGCTGAGCGATGAGTTTGTTCCTTCTCCGTCTGGAAGTCTAGCTCCAGCTCTCGTAGATCGGCTTCAAAC-----TCTT
      :::  :::  :::      ::  :  :::  ::  ::::  :::  ::  :  :  :::  ::      ::  :
HYALO  -----GCGCAGAGCTTG-----CGAC-GGACGAGTACCTCCCGCTTACGAATGT--GCTGGAAGGCGTTGTCAT

      1150      1160      1170      1180      1190      1200      1210      1220
PINFES TCTCTAGACCTAATA--GACGCTCATCTTGCAGGTCGATCAGCTCG--TCGACGTTGAGGAGGTGGGCCCGCAGAGCCAT
      ::::  ::  :::  ::  :::  :  :  :::  :  :::  :  :  :  :  :::::  :  :  :  ::::
HYALO  TCTCC-GAAAGAATCCGGATTATCACCCGG--AGTCT-TAAGCAAGCATTAAGA--AGGAGGTGGAACGGTTTGCCAA

      1230      1240      1250      1260      1270      1280
PINFES -CTGGAA-----CTGC---TCCTCGGC----TTCTCCAAGTCGCGATC---GAGCATCTGGATGAGCGCGTCTTTGCG
      :  ::::  :::  :::  :  :  ::::  :::::  :::::  :::::  :  :  :::  :  ::::  ::
HYALO  ACAGGAAGGGGCGCTGTCGTTCCGTGACCCATTCCGTCAAGTAGCGATAACGGAGCAACACACTGAATAC--CTTTACG

      1290      1300      1310      1320      1330      1340      1350      1360
PINFES ATCCACGTCGCGCTCGTGATTCTG-AGACCGCACCTCGACCTCTTTACGCAGCGCCTCCACCT-TGA-CAAGCCTCATGA
      :::  ::  :  :  :  :  :::::  ::  :  ::  :::  :  :  :  :  :  :  :::  :::  :::  :  ::
HYALO  CTCCT-GT-GTGTCCATCATTCTCTAGTTCTAACGTCG-----TGTGTTGTGCATGCTGCTGTGAACAAGTTGCTGGA

1370      1380      1390      1400      1410      1420      1430
PINFES TTTTCCGCCAATGGTTCTGGA----TCTT-GAG-CTTGTTTCATACGAGAGATCTTC-TCCTCTTTAG-CCATGAACTCCT
      ::  :::::  :  :  ::::  ::  ::  ::  :::::  :  :  :::::  :  :  :  :  :  :  :
HYALO  ----CGACAATGGACGTAGTACGCTCTTCGACACTCGTACATACGATTATGCGACGTCCTCTTTTCGGCCGTTTCTTTT

      1440
PINFES GCAGTAGGG
      :::  :  ::
HYALO  GCACTCAGG

```

PITG\_02417

Waterman-Eggert score: 164; 24.8 bits; E(1) < 0.12

51.4% identity (51.4% similar) in 863 nt overlap

```

          40          50          60          70          80          90          100          110
PINFES TGCATTTGCGGCACGTTTGGCATTGAAATTGGCATTGTTGCCAATTCCTGGTTGCGGAACATTTGCATGGTTAAGACGCC
      ::::  ::::  :::::  : ::  : ::::  : ::  :  :::::  ::::  ::::  : ::  :  ::::
HYALO  TGCA---GCGGATCGTTT--CGTTTGGAGTGGGAGTGGCGGTCGGAGCTGGTTACGGAC--TTTACGTGCT--GACGGA

          120          130          140          150          160          170          180
PINFES GCATGCCCTTGAGTGTACGCACTTT-----GAGTTC---GTCTCGTGTGAGAGGATGCATCGCGTCGTCATTATCTC-CG
      ::  :  ::::  :::::  ::::  : ::  :  :  : ::  : ::  : ::  :  :  ::::  ::  :  ::
HYALO  CGATATCGAGGAGTCCACGCACCAGATCCAGAGCTCCATGGGTAGTCTCAG-GGACGAGATGATTGGTCAAATGTGGCG

          190          200          210          220          230          240
PINFES CTATC-----TTCA--CCCTCG----GAGGAATAATCGTCGAGGTTTGGCGGGTTGATCTG-TAGCGGTTCCCTGAC-
      ::  :  ::  :  : ::::  :: ::  ::  :  :  :  :  :  :  :  :  :  :  :  :  :  :  :  :  :
HYALO  CTTACGAAGCGCATTGAAGCGCTCGAGGAGAAGACCAAGTGAGGAAAAGAGACAGG--GAGCTGCTAGCTGATGGAGACG

          250          260          270          280          290          300          310
PINFES -----CCATTGGTGCAA-TCGGACCGACCCCAAGGATCGAATGCAAAGTCGCCACAGCCCCGTTTCGTGCCGC
      :::::  :::::  : ::::  :::::  ::::  :  :  :  :  :  :  :  :  :  :  :  :  :  :  :
HYALO  CTAGAACACTAAACCATTGGTGGTGGTGGACGAGAGAGAAGGAGGAGATGGGAA--AGATAATGGCTC-TTCTTGATGT

          320          330          340          350          360          370          380          390
PINFES CTGCAGCTCCAAGTCCGCTGCAAAGTGTGATTCGCGATCATAGGCATCACTGGTAGGTTTGCTCTTCTGGGCATCT---
      ::::  ::  :  :  :  :  :  :  :  :  :  :  :  :  :  :  :  :  :  :  :  :  :  :
HYALO  TGGCAG-TC--AGT-----CATCCTCTCGTTTCG-----GTCTACACT--TGGTTTTTCTCTCTTGTCTATCACTT

          400          410          420          430          440          450          460
PINFES --GCCTGTTGCCTAGTGACAAGTGTGCTG-CGTACTGGT-GCAAATCTCATTGGTTTTCTGCTCAATGACACCCAAGTAAG
      ::  :  :  :  :  :  :  :  :  :  :  :  :  :  :  :  :  :  :  :  :  :  :  :
HYALO  GAGCTTGATTCATAGTT-----TACTCACGTACCATCAGCGTACGATAACTGGTTTACTGTTC-----CCGTGTCAG
```

```

      470      480      490      500      510      520      530
PINFES CCATCATGTTTCGCTTCCGTGACTACC-----GAATCG---CCCAACATC-TCCACCATGGCTTGTGCGTTGCATCCA
      : : : : : : : : : : : : : : : : : : : : : : : : : : : : : : : : : : : : : : : : : :
HYALO  C-AGC-TGT--GCT--CGTGACGAGCTGTTGCAGATCCGTAGACACGAGATCGTACACTTTGTCA-GCTAGCTGCATCGA

      540      550      560      570      580      590
PINFES -GTTTTAG---TGAACAAGTTCTGGATTGCACGTTTG---AC-AGTGTTCA----CTGTCTTCT----GAGCTTCTGCA-
      ::  ::  ::  ::  ::  ::  ::  ::  ::  ::  ::  ::  ::  ::  ::  ::  ::  ::  ::  ::  ::  ::
HYALO  CGTGAGAGCGCTGTGCAACGACTCGATGTC-CTTCCGGAAACTAGCATTTCAGCTCCTG-CTTTTCCTCGAGCTGCTTCAA

      600      610      620      630      640      650      660
PINFES CAACGAGTCTCACACTTTTCAGCTGCTTGTTCGGTGCAGTGCAAGTCGAGTTTC--CAAG-----TC---ACGTAGCAA
      :::: : :  :: :  ::  :::::  :::  ::  :::  :::  :::  :::  :::  :::  :::  :::  :::  :::
HYALO  CAAC-ATTGCGACGC-----GCAGCTTGTT--TGACCGCAGCTCGCGTTGCAGCAAGCAGAAGATCGCGACGTACCGG

      670      680      690      700      710      720      730      740
PINFES TTGCTT-GTGTGGCCAACA-CCATTTTCATCTGCAACTCCATTGGCTCCGTC-GCCGTAACGACGTT--CTTCATCA-C
      : : : : : : : : : : : : : : : : : : : : : : : : : : : : : : : : : : : : : : : : :
HYALO  TCCCGTAGTACTGTC--ACATCCATATTC---GC--CTTGAGTGTGTC-GTCTGCCATGAAGTCTCGACTAAATCATC

      750      760      770      780      790      800
PINFES G-TAGCGCTGCGATCCATTCCTCGAGTTTCTCAATCTCGTTGCTTTGTTTCGTTGACATAGTTA
      : :::::  : :: :  :::::  : :  :::::  :::  :::::  :::  :::  :::
HYALO  GATAGCGCTGG-----CGTCAAGCATCTCAGTAGCAGCGCTTTCATCG---ACATTGATA

```

---

PITG\_10664

Waterman-Eggert score: 290; 68.1 bits; E(1) < 3.6e-14

56.8% identity (56.8% similar) in 454 nt overlap

```

      2660      2670      2680      2690      2700      2710      2720      2730
PINFES GCTGCGTACTATCACTGGAGACTCTGCGAGCAGCAGATGAAGACCGTATTCTCCCCACAGCAGCAAGTGGAAGACGGCAA
      :::: : :  :::::  :::::  :::  : :  :::  : :  : :  : :  : :  : :  : :  : :  : :  : :
HYALO  GCTGAGTT-TATCAA---AGACTCTAATAGGAATTGCT-AAACTTAAATGAGCTCTTAATTCCAAACTGAACACGTAC

```

```

2740      2750      2760      2770      2780      2790      2800
PINFES GGAGCTGAGTGAGGAGCAACG----CTATCGACTCGCAGAAGCC-ACGGAGAACGAGCTCT--TGTCGGAGCTCTAC---
      :: ::  ::: : : : : : : : : : : : : : : : : : : : : : : : : : : : : : : : : : : :
HYALO  AGATCTAGATGATGAGCAACGAGCACGAT-GACTTAATGAGGCCACGTCAGACAAACCCAACTTTTCG-AACTCTTCCTT

      2810      2820      2830      2840      2850      2860      2870      2880
PINFES ---TACGCGTACGCCATGGTCTACGCCTTCACGGACGAGCCCTTCACCACTTTA-----CAGCCCGAGTCGCTCTTCCACG
      : : : : : : : : : : : : : : : : : : : : : : : : : : : : : : : : : : : : : : : : :
HYALO  ATTTCCACATGCGCCATGATCTCCACGTTTTCCGATG-GCCATTTACGACATTAATAGCAGTCCAAGT-GCTCCGAAA--

      2890      2900      2910      2920      2930      2940      2950      2960
PINFES CTGCTCGCTTCCTCCTCAACAAACTGTCAGCTCGAGG-CAGCAACGGCAGAGCGGGAGGAGGCAACGGCAACGCAGCAGC
      :: : :: :: : : : : : : : : : : : : : : : : : : : : : : : : : : : : : : : : : : : : : :
HYALO  --GCACCTTTTTTCGTCAACAATATGTCAGTGCATCGACATCGA-GGCATAATAGAATAATAAAGAGAAGACACGACAGC

      2970      2980      2990      3000      3010      3020      3030
PINFES GACGGCGCCTCCTCCTCCTGGGATCTCGCTCAGCAACATCTACTTCACTC----TCGGACACCACGCACTGCAGCTCGAG
      : : : : : : : : : : : : : : : : : : : : : : : : : : : : : : : : : : : : : : : : :
HYALO  GACGGCTTTTCCGCCTC--GATACAGCTTTCAAATACAACCCTTTCAGTCATACTTGAACACTATGCTTTGCACCTCAAG

      3040      3050      3060      3070      3080      3090
PINFES AGCTACAAACTGGCGCGACAGGCGTACGAGAAACTGCTGCAGATGCGGCTGAGA
      : : : : : : : : : : : : : : : : : : : : : : : : : : : : : : : : : : : : : : : : :
HYALO  TGCTACGTGCTGGTACGACGCGCTTGCATTAATCT-CTTCAGGTGCTGTCGTGA

```
