# Supplementary material for: Decay of Genes Encoding the Oomycete Flagellar Proteome in the Downy Mildew Hyaloperonospora arabidopsidis
Source: PubMed Central journal article supplement (PMC3471859; doi:10.1371/journal.pone.0047624), 2012-10-15
Supplement: pone.0047624.s004.pdf [file pone.0047624.s004.pdf]

**Table S2.** Features of gene remnants detected in *H. arabidopsidis*<sup>1</sup>.

| PITG NUMBER | COMMON NAME | SIZE OF <i>P. INFESTANS</i> GENE (NT) | NT OF <i>P. INFESTANS</i> GENE IN ALIGNMENT <sup>2</sup> | FRACTION OF <i>P. INFESTANS</i> GENE IN ALIGNMENT <sup>2</sup> | LALIGN SCORE <sup>3</sup> | PER CENT NT MATCH | FALSE DISCOVERY RATE <sup>4</sup> | <i>E</i> VALUE FROM PRSS (SHUFFLE) <sup>5</sup> |
|-------------|-------------|---------------------------------------|----------------------------------------------------------|----------------------------------------------------------------|---------------------------|-------------------|-----------------------------------|-------------------------------------------------|
| 627         | FBB9        | 714                                   | 239                                                      | 0.33                                                           | 178                       | 54                | 5E-05                             | 2E-26                                           |
| 942         | DAP2        | 1713                                  | 371                                                      | 0.22                                                           | 492                       | 62                | 5E-03                             | 9E-46                                           |
| 1067        | BBS7        | 2250                                  | 429                                                      | 0.19                                                           | 144                       | 57                | (0)                               | 2E-25                                           |
| 1312        | FAP155      | 1317                                  | 375                                                      | 0.28                                                           | 216                       | 55                | 2E-03                             | 6E-41                                           |
| 2417        | DCC2        | 1824                                  | 769                                                      | 0.42                                                           | 164                       | 51                | 8E-04                             | 2E-95                                           |
| 2492        | MOT51       | 6741                                  | 306                                                      | 0.05                                                           | 227                       | 58                | (0)                               | 2E-34                                           |
| 2721        | FAP267      | 1218                                  | 1150                                                     | 0.94                                                           | 268                       | 50                | 3E-04                             | 1E-125                                          |
| 3419        | CPC1        | 4512                                  | 1323                                                     | 0.29                                                           | 396                       | 52                | 2E-03                             | 1E-132                                          |
| 3488        | DHC6        | 12942                                 | 180                                                      | 0.01                                                           | 208                       | 63                | (0)                               | 3E-25                                           |
| 3600        | BBS2        | 2172                                  | 1662                                                     | 0.77                                                           | 868                       | 53                | 2E-03                             | 2E-186                                          |
| 3878        | DIC1        | 2259                                  | 290                                                      | 0.13                                                           | 283                       | 59                | 3E-03                             | 1E-32                                           |
| 4600        | DII6        | 1773                                  | 372                                                      | 0.21                                                           | 240                       | 59                | (0)                               | 1E-40                                           |
| 4711        | IFT25       | 417                                   | 233                                                      | 0.56                                                           | 228                       | 57                | 9E-03                             | 2E-28                                           |
| 4848        | MOT28       | 504                                   | 226                                                      | 0.45                                                           | 399                       | 62                | (0)                               | 1E-52                                           |
| 5487        | SSA1        | 1683                                  | 755                                                      | 0.45                                                           | 369                       | 55                | 5E-03                             | 2E-91                                           |
| 5499        | FAP58       | 2667                                  | 850                                                      | 0.32                                                           | 528                       | 57                | 1E-03                             | 4E-71                                           |
| 5608        | FM135       | 2841                                  | 1883                                                     | 0.66                                                           | 415                       | 51                | (0)                               | 1E-152                                          |
| 6195        | SSA2        | 1689                                  | 375                                                      | 0.22                                                           | 196                       | 60                | 1E-03                             | 7E-17                                           |
| 7793        | DLT2        | 411                                   | 192                                                      | 0.47                                                           | 170                       | 58                | 2E-03                             | 7E-15                                           |
| 8015        | DLI1        | 1149                                  | 570                                                      | 0.50                                                           | 278                       | 56                | (0)                               | 2E-36                                           |
| 8038        | MOT25       | 621                                   | 174                                                      | 0.28                                                           | 166                       | 59                | (0)                               | 7E-75                                           |
| 8685        | UNC119      | 720                                   | 581                                                      | 0.81                                                           | 333                       | 54                | (0)                               | 6E-67                                           |
| 10664       | IFT122      | 3858                                  | 433                                                      | 0.11                                                           | 290                       | 57                | (0)                               | 2E-44                                           |
| 10796       | FAP250      | 1686                                  | 1227                                                     | 0.73                                                           | 241                       | 51                | 1E-02                             | 8E-85                                           |
| 11109       | FAP57       | 3900                                  | 2713                                                     | 0.70                                                           | 261                       | 50                | 2E-03                             | 8E-57                                           |
| 11526       | BBS9        | 2754                                  | 1146                                                     | 0.42                                                           | 630                       | 52                | (0)                               | 9E-128                                          |
| 12109       | MOT49       | 864                                   | 208                                                      | 0.24                                                           | 195                       | 59                | (0)                               | 6E-23                                           |
| 12763       | FBB4        | 1443                                  | 1324                                                     | 0.92                                                           | 472                       | 52                | (0)                               | 7E-128                                          |
| 12891       | MOT17       | 1020                                  | 592                                                      | 0.58                                                           | 291                       | 54                | 4E-04                             | 9E-71                                           |
| 13069       | TAT         | 540                                   | 200                                                      | 0.37                                                           | 138                       | 56                | 3E-03                             | 6E-17                                           |
| 13461       | DIP13       | 336                                   | 207                                                      | 0.62                                                           | 231                       | 60                | (0)                               | 4E-22                                           |

| PITG NUMBER | COMMON NAME | SIZE OF <i>P. INFESTANS</i> GENE (NT) | NT OF <i>P. INFESTANS</i> GENE IN ALIGNMENT <sup>2</sup> | FRACTION OF <i>P. INFESTANS</i> GENE IN ALIGNMENT <sup>2</sup> | LALIGN SCORE <sup>3</sup> | PER CENT NT MATCH | FALSE DISCOVERY RATE <sup>4</sup> | <i>E</i> VALUE FROM PRSS (SHUFFLE) <sup>5</sup> |
|-------------|-------------|---------------------------------------|----------------------------------------------------------|----------------------------------------------------------------|---------------------------|-------------------|-----------------------------------|-------------------------------------------------|
| 14226       | IFT46       | 1536                                  | 138                                                      | 0.09                                                           | 124                       | 57                | 7E-03                             | 4E-11                                           |
| 14588       | MKS1        | 606                                   | 99                                                       | 0.16                                                           | 157                       | 64                | 1E-03                             | 2E-11                                           |
| 15414       | DII1        | 792                                   | 83                                                       | 0.10                                                           | 136                       | 64                | 8E-03                             | 1E-09                                           |
| 16089       | SSA4        | 621                                   | 473                                                      | 0.76                                                           | 271                       | 59                | 1E-02                             | 2E-34                                           |
| 18065       | FAP66       | 4077                                  | 304                                                      | 0.07                                                           | 283                       | 59                | 1E-04                             | 2E-29                                           |
| 20212       | IFT172      | 5349                                  | 2126                                                     | 0.39                                                           | 494                       | 54                | (0)                               | 4E-120                                          |
| 20902       | DLE3        | 714                                   | 451                                                      | 0.63                                                           | 261                       | 57                | 1E-03                             | 2E-46                                           |
| 21013       | KAP         | 1917                                  | 1789                                                     | 0.93                                                           | 559                       | 54                | (0)                               | 3E-175                                          |

<sup>1</sup>Gene remnants were identified by using LALIGN to search the relevant intergenic regions of *H. arabidopsidis* with *P. infestans* gene sequences, trimmed of introns. Matches with  $E < 0.2$  were then examined in more detail.

<sup>2</sup>Counts all bases in alignment, including identical and unmatched bases, but excluding gaps.

<sup>3</sup>Using default parameters in LALIGN (+5/-4 matrix, open/ext: -12/-4). If separate segments were generated by LALIGN, the score reflects the highest value.

<sup>4</sup>Determined by searching  $7 \times 10^6$  nt of sequences from *H. arabidopsidis*, joined from 1000-nt regions of DNA downstream of 7000 genes, with each *P. infestans* sequence. The number of matches obtained using the threshold employed for gene remnant detection ( $E < 0.2$ ), minus authentic hits (if any) against remnants, was multiplied by the size of the *H. arabidopsidis* sequence originally searched for remnants and divided by  $7 \times 10^6$ . If no hits were detected, a rate of "(0)" is reported.

<sup>5</sup>The statistical significance of alignments was estimated by employing the program PRSS ([http://fasta.bioch.virginia.edu/fasta\\_www2/fasta\\_www.cgi?rm=shuffle](http://fasta.bioch.virginia.edu/fasta_www2/fasta_www.cgi?rm=shuffle)), using 200 shuffles of the *H. arabidopsidis* sequence. If separate segments were generated by LALIGN, the *E* value is shown for the PRSS analysis of the LALIGN alignment with the highest score.
