# Supplementary material for: Decay of Genes Encoding the Oomycete Flagellar Proteome in the Downy Mildew Hyaloperonospora arabidopsidis
Source: PLoS One. 2012 Oct 15;7(10):e47624. doi: 10.1371/journal.pone.0047624 (PMC3471859; doi:10.1371/journal.pone.0047624)
Supplement: Table S1 — Flagellar candidates from P. infestans . Indicated are the gene numbers in the Broad Institute database, common name of the locus, predicted functions, corresponding loci in C. reinhardtii or other flagellates, expression patterns in P. infestans, conservation in O. tauri and H. arabidopsidis, and whether gene remnants were detected in the latter. (XLS) [file pone.0047624.s003.xls]

## Sheet: Found in P. infestans
				Normalized gene expression (ns=no signal)										Sequences used to search P. infestans
P. infestans gene number (Broad Institute database record, PITG_ prefix)	Common name (Fig. 1, 2)	Functional category (Fig. 1)	Predicted function	NSM	20H	SPO	ZOO	Microarray or RT-qPCR	Spore-induced (>2.5-fold)?	Ortholog in H. arabidopsidis?	P. infestans & H. arabidopsidis shared synteny?	P. infestans & P. sojae shared synteny?	Remnant detected in H. arabidopsidis?	Chlamydomonas reinhardtii JGI v.3	Naegleria gruberi JGI v.1	If not referred to in Chlamydomonas and Naegleria papers: GB, Genbank; Tb, T. brucei; TT, T. thermophila
63	LF4	Regulatory	Long flagella protein, MAP kinase	0.11	0.82	1.52	1.55	MA	yes	no	yes	yes		134943	65383
156	TUB	Tubulin-related	Tubulin beta	0.24	0.72	2.87	0.18	RT	yes	yes	yes	yes		129876	55900
298	SSA16	Regulatory	Alpha kinase	1.1	0.83	1.12	0.95	RT	no	yes	yes	yes		192430
402	FBB11	Uncharacterized	Uncharacterized flagella-associated protein	0.34	3.48	0.16	0.03	MA	yes	no	yes	yes		160148
627	FBB9	Uncharacterized	Uncharacterized flagella-basal body protein	ns	ns	ns	ns			no	yes	yes	yes	105624	72811
635	PKD2	Regulatory	Protein kinase	ns	ns	ns	ns			yes	yes	yes		152928
660	FAP65	Uncharacterized	Uncharacterized flagella-associated protein	ns	ns	ns	ns			no	no	yes		153955	68477
790	FAP52 (BUG14, WDR16)	Basal body	WD40-containing protein	ns	ns	ns	ns			no	no	yes		128114	59637
797	DAW1 (ODA16)	Outer dynein arm	Outer dynein arm protein, IFT adapter	0.14	1.77	1.52	0.58	MA	yes	no	no	yes		19507
827	TT16871	Basal body	Basal body protein with SPFH domain	1.03	0.85	1.03	1.09	RT	no	yes	no	no				TT16871 (Tetrahymena)
942	DAP2 (MOT 48)	Uncharacterized	Uncharacterized flagella-associated protein	1.5	1.23	1.26	0.01	MA	no	no	yes	yes	yes	143267
1003	SSA7	Uncharacterized	Uncharacterized flagella-associated protein	0.56	1.06	1.85	0.53	RT	yes	yes	yes	yes		180447
1027	SFA	Basal body	SF-assemblin, part of distal striated fiber	0.01	0.58	1.74	1.67	MA	yes	no	yes	yes		127995
1067	BBS7	Basal body	Transport to flagellar base	0.19	1.32	2.05	0.44	MA	yes	no	yes	yes	yes	190054	68114
1088	DHC10 (IDA2)	Inner dynein arm	Inner dynein arm protein	0.08	0.36	1.72	1.84	MA	yes	no	yes	no		137221
1154	GCP2	Tubulin-related	Gamma-tubulin complex component	1.53	0.7	0.87	0.9	MA	no	yes	yes	yes				GB: XP_001707727 (Giardia)
1219	PF16 (ACA)	Central pair	Central pair protein	0.17	0.55	1.62	1.66	MA	yes	no	yes	yes		103782	30562
1258	RABL2A	Regulatory	Rab-type GTPase	ns	ns	ns	ns			no	yes	yes		192441
1312	FAP155	Protein interaction	Leucine rich repeat protein	0.48	1.45	1.59	0.48	MA	yes	no	yes	yes	yes	190077	68976
1416	BBS8	Basal body	basal body protein with peptidase activity	0.26	1.33	2.27	0.13	MA	yes	no	yes	no		140113	80979
1557	PP11	Central Pair	Protein phosphatase 2C-related protein	1.49	0.75	0.58	1.18	MA	no	no	yes	yes		147682
1567	MOT39	Regulatory	IQ calmodulin-binding and zinc finger region	0.05	0.2	2.06	1.69	MA	yes	no	yes	yes		173581	72718
1693	FM144 (POC16)	Centriole	Centriolar protein	ns	ns	ns	ns			no	yes	yes		18900	62107
1693	TT218620	Uncharacterized	WD40 domain protein	ns	ns	ns	ns			no	no	no				TT22289 (Tetrahymena)
1717	PF9	Inner dynein arm	Inner arm dynein 1 heavy chain alpha	0.24	0.75	1.74	1.27	MA	yes	no	no	no		60432
1859	MOT4	Uncharacterized	Zn-finger-like, PHD finger	0.32	0.8	2.24	0.64	RT	yes	no	yes	yes		176821
1868	DYF17	Intraflagellar transport	Intraflagella transport protein	0.35	0.78	2.78	0.09	RT	yes	no	no	no				GB: CAC51066 (C. elegans)
1908	CAH1	Metabolism	Carbonic anhydrase	0.8	2.5	0.7	0.01	MA	yes	no	no	yes		24120	73137
1977	FAP73	Uncharacterized	Uncharacterized flagella-associated protein	0.27	0.59	2.72	0.42	RT	yes	no	yes	yes		167096	46913
2094	RSP16	Radial spoke	Radial spoke protein	0.11	1.01	1.91	0.96	RT	yes	no	no	yes		78044
2163	RIB43A	Tubulin-related	Flagellar protofilament ribbon protein	0.23	0.46	1.18	2.14	MA	yes	no	no	no		77703	83064
2248	MBO2	Protein interaction	Coiled-coil protein	0.11	0.69	2.72	0.48	RT	yes	no	yes	yes		192170	62959
2254	MOT3	Uncharacterized	Uncharacterized flagella-associated protein	0.16	1.43	2.41	0	MA	yes	no	yes	yes		148926
2417	DCC2 (ODA1, ODA-DC2)	Outer dynein arm	Outer dynein arm protein	0.04	1.17	2.15	0.63	RT	yes	no	yes	yes		132719	81548
2442	MOT15	Metabolism	Cysteine peptidase	ns	ns	ns	ns			no	no	no		141685	3580
2482	SSA9	Uncharacterized	Protein with helicase-associated region	1.04	0.79	0.76	1.42	MA	no	yes	yes	yes		172167
2492	MOT51	Protein interaction	WD domain protein	0.28	0.66	2.4	0.66	RT	yes	no	yes	yes	yes	168908	73917
2495	TB11.01.6300	Regulatory	Phosphatidylinositol 3-related kinase	ns	ns	ns	ns			yes	yes	yes		113516		Tb11.01.6300 (Trypanosoma)
2583	FAP251	Protein interaction	WD domain protein	ns	ns	ns	ns			no	no	yes		145396	29188
2616	CEN1/2	Regulatory	Centrin (caltractin)	0.05	2.17	1.12	0.66	MA	yes	no	no	yes				GB: NP_004335 (human)
2707	SSA20	Metabolism	Chymotrypsin	1.03	1.29	0.53	1.15	MA	no	yes	yes	yes		143218
2721	FAP267	Tubulin-related	Tubulin-tyrosine ligase	0.18	0.87	2.4	0.55	RT	yes	no	yes	yes	yes	100760
2723	MOT42	Uncharacterized	Zinc finger-containing protein	0.9	0.82	1.42	0.86	MA	no	yes	yes	yes		152883
2778	FAP43	Protein interaction	WD domain protein	0.11	0.73	2.77	0.4	RT	yes	no	yes	yes		193355
2784	DAU1 (MOT49, ODA7)	Outer dynein arm	Outer dynein arm protein with leucine-rich repeats	0.29	0.59	1.89	1.23	RT	yes	no	yes	yes		116664
2788	DLE1 (MOT54, ODA-LC4)	Outer dynein arm	Outer dynein arm light chain protein	0.21	0.68	2.33	0.78	RT	yes	no	yes	yes		188421
2853	ECH1	Metabolism	EnoylCoA hydratase/isomerase	0.81	1.66	1.04	0.49	RT	no	yes	yes	yes		115671	33361
2952	BBS4	Basal body	Transport to flagellar base	0.06	0.9	2.7	0.34	RT	yes	no	yes	yes		129948	28891
3018	DHC2	Inner dynein arm	Dynein heavy chain protein	0.03	0.66	1.61	1.7	MA	yes	no	yes	yes		130324	78559
3050	MOT9	Uncharacterized	Uncharacterized flagella-associated protein	0.1	0.63	1.41	1.87	MA	yes	no	yes	yes		194403
3077	SSA11	Tubulin-related	Tubulin-tyrosine ligase	0.22	0.44	2.5	0.83	RT	yes	no	yes	yes		118345	80835
3082	DLU2 (ODA-LC1, DLC1)	Outer dynein arm	Outer dynein arm light chain protein	0.36	1.13	1.91	0.6	RT	yes	no	yes	yes		186669	74922/54720
3198	FM138	Protein interaction	Leucine-rich repeat protein	0.08	1.01	2.01	0.9	RT	yes	no	no	no			74042
3309	IFT140	Intraflagellar transport	Intraflagellar transport protein	0.3	1.46	1.68	0.55	MA	yes	no	yes	yes		192205	48798
3380	BBC78	Basal body	Basal body protein	1.23	1.23	0.98	0.55	RT	no	yes	no	yes				TT22399 (Tetrahymena)
3419	CPC1	Central pair	Central pair complex adenylate kinase	0.17	0.12	0.77	2.94	MA	yes	no	yes	yes	yes	24512
3423	DHC14 (ODA4)	Outer dynein arm	Outer dynein arm protein	0.05	0.55	2.95	0.45	RT	yes	no	yes	yes		24252	55628
3487	FAP50	Protein interaction	Leucine rich repeat protein	0.16	0.78	2.69	0.38	RT	yes	no	yes	yes		177591	68117
3488	DHC6	Inner dynein arm	Dynein heavy chain protein	0.31	1.01	2.52	0.16	RT	yes	no	yes	yes	yes	134599	81845
3592	FAP14	Protein interaction	Heat repeat protein	2.26	1.37	0.39	0.14	MA	no	no	yes	yes		194683	50227
3600	BBS2	Basal body	Transport to flagellar base	0.09	0.83	3.05	0.04	RT	yes	no	yes	yes	yes	126758	71257
3634	FAP67	Metabolism	Nucleoside diphosphate kinase	0.18	1	2.18	0.65	MA	yes	no	no	yes		188246	33146
3691	BBC52	Basal body	Basal body EF-hand protein	0.23	1.49	2.06	0.23	RT	yes	no	yes	yes				TT22363 (Tetrahymena)
3772	ARLP1	Regulatory	ARF-like GTPase	ns	ns	ns	ns			no	yes	yes		195529
3878	DIC1 (ODA9, ODA-IC1)	Outer dynein arm	Outer dynein arm intermediate chain protein	0.3	1.2	1.94	0.57	MA	yes	no	yes	yes	yes	129433	78637
3942	BLD10	Basal body	Basal body cartwheel protein	0.04	0.36	2.49	1.11	RT	yes	no	yes	yes		166062	77710
3986	BBS1	Basal body	basal body protein	0.09	1.2	2.17	0.54	MA	yes	no	no	no		1020033	65179
4376	C1	Protein interaction	Protein with protein and RNA binding domains	1.24	0.84	1.29	0.64	MA	no	yes	yes	yes		182403
4489	FM165	Metabolism	AAA ATPase	0.72	0.73	1.01	1.55	MA	no	yes	yes	yes			29126
4513	RIB72	Metabolism	Nucleoside-diphosphokinase regulatory subunit	0.19	0.48	1.36	1.98	MA	yes	no	yes	yes		126286	81047
4560	FBB18	Uncharacterized	Uncharacterized flagella-associated protein	0.42	1.79	1.11	0.68	MA	yes	yes	no	no		132143
4600	DII6 (FAP94, IC97)	Inner dynein arm	Intermediate chain dynein, interacts with inner arm	0.57	1.14	2	0.29	RT	yes	no	yes	yes	yes	190653
4651	MOT46	Intraflagellar transport	Intraflagellar transport protein	ns	ns	ns	ns			yes	no	no		195180
4666	SSA13	Regulatory	Calcium-binding EF-hand protein	0.38	0.18	1.06	2.38	RT	yes	yes	yes	yes		127720
4669	MOT16	Uncharacterized	Protein of unknown function DUF1042	0.51	1.25	1.28	0.96	RT	yes	no	yes	yes		193672	65518
4697	DLU2	Outer dynein arm	Leucine-rich repeat protein required for outer arm assembly	0.04	0.04	0.31	3.61	MA	yes	no	yes	yes		146778	61232
4711	IFT25	Intraflagellar transport	Intraflagella transport protein	ns	ns	ns	ns			no	yes	no	yes			GB:EF593953 (Chlamydomonas)
4848	MOT28	Uncharacterized	Uncharacterized flagella-associated protein	ns	ns	ns	ns			no	yes	yes	yes	177784
4893	FAP69	Protein interaction	Armadillo repeat protein	0.47	0.86	1.7	0.98	MA	yes	no	no	yes		121413	33146
5288	FAP134	Protein interaction	Leucine rich repeat protein	0.18	0.5	3.1	0.23	RT	yes	no	yes	yes		172483	74561
5291	IRK1	Regulatory	Potassium channel protein	1.27	1.33	0.76	0.63	RT	no	yes	no	no		169948
5447	SPEF1	Uncharacterized	DUF1042-containing protein	0.27	0.8	1.87	1.05	RT	yes	no	no	yes		138013
5487	SSA1	Regulatory	Protein kinase	0.2	0.8	2.57	0.43	RT	yes	no	yes	yes	yes	102300
5499	FAP58	Protein interaction	Rho-binding repeat protein	0.2	0.79	1.64	1.38	MA	yes	no	yes	yes	yes	143677
5548	FBB17	Uncharacterized	Carboxypeptidase	0.33	0.7	2.49	0.48	RT	yes	no	yes	yes		98915	72811
5583	FM107 (GSTS1)	Metabolism	Glutathione S transferase	1.09	1.46	0.99	0.42	MA	no	yes	yes	yes		193691	71505/70195
5605	RSP10	Radial spoke	Radial spoke protein	0.06	0.76	2.35	0.83	RT	yes	no	yes	yes		185792
5608	FM135	Uncharacterized	Uncharacterized flagella-associated protein	0.19	0.76	1.14	1.9	RT	yes	no	no	no	yes		62841
5619	RSP7	Radial spoke	Radial spoke protein	ns	ns	ns	ns			no	yes	yes		189584
5629	MOT18	Uncharacterized	non-canonical poly(A) polymerase family	1.48	1.14	0.68	0.7	RT	no	yes	yes	no		177575
5682	DLL1 (ODA-LC8)	Outer dynein arm	Outer dynein arm light chain protein	0.07	2.08	1.77	0.08	RT	yes	no	yes	no		194837
5883	BBS5	Basal body	Transport to flagellar base	0.28	0.56	2.79	0.37	RT	yes	no	yes	yes		182299	34252
5920	MOT50	Intraflagellar transport	Intraflagellar transport protein	1.19	0.86	0.86	1.08	RT	no	yes	no	no		107386	71996/54684
5940	SAS6A	Basal body	Basal body cartwheel protein	0.75	1.58	0.56	1.11	RT	no	yes	yes	yes		17531	68996
5972	FAP74	Central pair	Central pair projection protein	0.25	0.71	2.48	0.56	RT	yes	no	yes	yes		167096
6106	IFT81	Intraflagellar transport	Intraflagellar transport protein	0.37	1.11	2.2	0.32	RT	yes	no	yes	yes		138649	64053
6112	FAP119	Central pair	Coiled coil protein	0.34	0.47	1.69	1.49	MA	yes	no	yes	yes		142392	71676
6195	SSA2	Metabolism	Carboxypeptidase A	0.45	1.52	0.92	1.11	MA	yes	no	yes	yes	yes	150669
6225	RSP4	Radial spoke	Radial spoke protein	0.07	1.69	1.71	0.53	MA	yes	no	yes	yes		24016	49798
6513	CAL	Regulatory	Calmodulin	0.93	0.99	1.02	1.07	MA	no	yes	yes	yes			55564	Tb11.01.4623 (Trypanosoma)
6694	MOT5	Intraflagellar transport	Intraflagellar transport protein	0.04	1.42	1.84	0.71	MA	yes	no	yes	yes		173632	54684
6778	FAP22	Protein interaction	Coiled-coil protein	0.51	1.86	1.62	0.01	MA	yes	no	yes	yes		192420	62998
6833	POC18	Centriole	RabGAP WD40 protein	0.14	0.42	0.45	2.99	RT	yes	no	yes	yes		6466
6904	FBB5	Uncharacterized	Uncharacterized flagella-basal body protein	ns	ns	ns	ns			no	yes	yes		190937
6915	RSP2	Radial spoke	Radial spoke protein	0.43	1.57	1.04	0.96	RT	yes	no	yes	yes		186281
6949	IFT20	Intraflagellar transport	Intraflagellar transport protein	0.24	1.54	1.81	0.41	MA	yes	no	yes	yes		182072	62977
6954	FM177	Metabolism	Oxidoreductase FAD/NAD(P)-binding	0.75	0.46	0.44	2.35	MA	yes	no	yes	yes			59563
7108	FM136	Uncharacterized	B9 domain protein	ns	ns	ns	ns			no	no	yes			30379
7309	RSP8	Radial spoke	Radial spoke protein	0.12	0.73	2.49	0.66	RT	yes	no	yes	no		141286
7793	DLT2 (ODA-LC2)	Outer dynein arm	Outer dynein arm light chain protein	0.05	1.36	2.11	0.48	MA	yes	no	yes	yes	yes	184900
7855	MOT20	Uncharacterized	Uncharacterized flagella-associated protein	0.17	0.22	0.25	3.36	RT	no	yes	yes	yes		192150
7886	RIB72	Metabolism	Nucleoside-diphosphokinase regulatory subunit	0.2	1.36	2.43	0.01	RT	yes	no	yes	yes		126286	81047
7917	AGG2	Regulatory	Membrane protein	0.67	0.7	2.63	0.1	MA	yes	no	no	yes		159623
7966	POC11	Centriole	Uncharacterized flagella-associated protein	0.07	0.52	0.98	2.43	MA	yes	no	yes	yes		13542
7996	TUBA (TUBULIN-ALPHA)	Tubulin-related	Tubulin alpha	0.16	1.14	2.29	0.42	RT	yes	yes	yes	yes		128523	72133
8015	DLI1 (D1BLIC)	Intraflagellar transport	Dynein light intermediate chain	0.16	0.67	2.46	0.71	RT	yes	no	yes	yes	yes	130394	80259
8038	MOT25	Uncharacterized	Uncharacterized flagella-associated protein	0.08	0.3	2.24	1.38	MA	yes	no	yes	no	yes	192442	56610
8216	FAP57	Protein interaction	WD domain protein	0.24	0.44	2.81	0.51	RT	yes	no	yes	yes		194338	61313
8375	FM106	Metabolism	Glucokinase	1.24	1.09	1.25	0.39	MA	no	yes	yes	yes			49289
8395	FAP100	Uncharacterized	Uncharacterized flagella-associated protein	0.05	0.46	2.76	0.73	RT	yes	no	yes	yes		188180
8423	FLA8	Intraflagellar transport	Kinesin	0.37	1.1	1.87	0.66	RT	yes	no	no	yes		185750
8424	KLP1	Central pair	Kinesin-like protein	0.22	0.83	2.21	0.74	MA	yes	no	no	yes		186414	64648
8458	FLA10	Intraflagellar transport	Kinesin	1.18	0.75	1.39	0.68	MA	no	no	no	yes		185750
8492	FAP198	Uncharacterized	Cytochrome b5-like heme-binding domain protein	0.18	0.58	2.91	0.32	RT	yes	no	yes	yes		119090	30192
8685	UNC119 (POC7)	Uncharacterized	Uncharacterized flagella and centriole protein	0.16	1.73	1.89	0.23	RT	yes	no	yes	yes	yes	185788	56340
8756	MOT11	Tubulin-related	Tubulin-tyrosine ligase	0.33	0.67	2	1	MA	yes	no	no	yes		126569
8808	MOT6	Regulatory	EF-hand domain protein	1.12	1.02	1.08	0.78	RT	no	yes	yes	yes		102649
8875	ODF3 (FAP71)	Basal body	Outer dense fiber/basal body protein	0.01	0.4	2.36	1.23	RT	yes	no	yes	yes		29687
8880	ARLC2 (ARL3)	Regulatory	ARF-like GTPase	0.04	1.23	1.07	1.66	MA	yes	no	no	yes		128761	79456
8954	TT6659	Basal body	Basal body EF-hand protein	0.82	2.85	0.31	0.02	RT	yes	no	yes	yes				TT06659 (Tetrahymena)
9030	DLL3 (MOT24)	Outer dynein arm	Dynein light chain	ns	ns	ns	ns			no	yes	yes		131333
9092	NDK7 (BUG5)	Metabolism	Nucleoside diphosphate kinase	0.65	0.72	1.19	1.45	MA	no	yes	yes	yes		180221
9137	IFT22 (FAP9)	Intraflagellar transport	Intraflagellar transport protein	0.36	1.19	1.79	0.66	MA	yes	no	no	yes		195877	4601
9209	TPR5 (FAP259)	Protein interaction	Tetratricopeptide repeat protein	0.27	1.61	1.68	0.44	RT	yes	no	no	yes		128801	61993
9288	NPH4 (POC10)	Centriole	IQ calmodulin-binding region	0.44	1.08	2.37	0.1	RT	yes	no	yes	yes		32880
9294	FM145	Regulatory	Calcium-binding EF-hand	ns	ns	ns	ns			no	no	no			57344
9306	MAS1	Mastigoneme	Mastigoneme protein	0.12	0.26	1.35	2.28	MA	yes	no	no	yes				GB: BAH60835 O. danica Ocm2
9311	FAP81	Uncharacterized	Uncharacterized flagella-associated protein	0.26	0.66	2.41	0.67	RT	yes	no	no	yes		188960
9445	ACP1	Metabolism	Acyl carrier protein	1.08	0.74	1.67	0.51	RT	no	yes	yes	yes		132151
9512	BBC30	Basal body	Basal body protein	0.98	0.88	1.37	0.78	RT	no	yes	no	no				TT24859 (Tetrahymena)
9652	DPY30	Uncharacterized	Chromatin modifying protein complex protein	0.61	0.94	1.18	1.27	MA	no	no	yes	no		3897	69688
9704	DLT3 (TCTEX1)	Inner dynein arm	Inner arm dynein light chain protein	0.75	1.63	1.62	0.01	MA	no	no	yes	yes		160073	29177
9952	RSP9	Radial spoke	Radial spoke protein	0.08	1.19	2.1	0.63	RT	yes	no	yes	yes		182960
10021	RSP1	Radial spoke	Radial spoke protein	0.38	0.81	2.25	0.56	RT	yes	no	no	yes		196412
10077	RSP23 (FAP106)	Radial spoke	Radial spoke protein	0.25	0.46	2.75	0.54	RT	yes	no	no	yes		139197
10094	IFT88	Intraflagellar transport	Intraflagellar transport protein	0.11	1.71	0.95	1.24	MA	yes	no	yes	yes		24421	63280
10096	FAP60 (IFT139)	Intraflagellar transport	Intraflagellar transport protein	0.15	0.46	3.23	0.15	RT	yes	no	yes	yes		126867	50399
10127	RAB23	Regulatory	Rab-type GTPase	0.05	0.29	1.77	1.88	MA	yes	no	yes	yes		195517	31544
10211	BUG22 (FAP20)	Basal body	DUF667-containing basal body protein	0.15	1.51	2.04	0.3	RT	yes	no	no	no				GB: XP_001708694 (Giardia)
10212	BBS3 (ARL6)	Basal body	Transport to flagellar base	0.02	0.3	2.06	1.62	MA	yes	no	no	yes		24475
10664	IFT122	Intraflagellar transport	Intraflagellar transport protein	ns	ns	ns	ns			no	partial	yes	yes	153826	71180
10796	FAP250	Uncharacterized	Uncharacterized flagella-associated protein	0.16	0.49	2.15	1.19	MA	yes	no	yes	yes	yes	106450	1424
10868	FBB15	Uncharacterized	DUF716 domain-containing protein	0.27	1.89	1.65	0.19	RT	yes	no	yes	yes		169559
10933	MAS2	Mastigoneme	Mastigoneme (possibly truncated gene)	0.05	2.04	1.17	0.73	MA	yes	no	yes	yes				GB: BAF65668 (Ochromonas)
10934	MAS2	Mastigoneme	Mastigoneme protein	0.05	2.04	1.17	0.73	MA	yes	no	yes	yes				GB: BAF65668 O. danica Ocm1
10996	FAP264	Protein interaction	Leucine rich repeat protein	0.26	0.72	2.98	0.04	RT	yes	no	yes	yes		144241
11003	TB10.6K15.0810	Uncharacterized	Uncharacterized flagella associated protein	ns	ns	ns	ns			no	no	no				Tb10.6k15.0810 (Trypanosoma)
11109	FAP57	Protein interaction	WD domain protein	0.11	0.66	2.25	0.97	MA	yes	no	yes	yes	yes	194338	61313
11375	DLX2 (ODA-LC5, DLC5)	Outer dynein arm	Outer dynein arm light chain protein	0.04	1.19	1.89	0.88	RT	yes	no	no	no		152943
11403	POC1	Centriole	WD domain protein	1.14	2.47	0.38	0.01	MA	no	no	no	no		112249	33676
11437	DHC10 (IDA2)	Inner dynein arm	Inner dynein arm protein	0.08	0.36	1.72	1.84	MA	yes	no	yes	no		137221
11472	IFT72/74	Intraflagellar transport	Intraflagellar transport protein	0.05	1.02	2.51	0.42	RT	yes	no	yes	yes		136521
11526	BBS9	Basal body	Transport to flagellar base	0.12	0.92	2.8	0.16	MA	yes	no	yes	yes	yes	101137	80972
11749	ANK24 (FAP175)	Protein interaction	Ankryn domain-containing protein	0.15	0.83	1.76	1.27	RT	yes	yes	no	no		8129
11983	MOT41 (IFT43)	Intraflagellar transport	Intraflagellar transport protein	0.01	1.2	1.67	1.11	MA	yes	no	no	yes		142470
12109	MOT49	Uncharacterized	Outer dynein arm protein with leucine-rich repeats	0.3	0.84	2.66	0.21	RT	yes	no	yes	yes	yes	116664
12155	RSP12 (MOT14)	Radial spoke	Radial spoke protein	1.34	0.85	1.5	0.31	MA	no	yes	yes	yes		130542
12186	MAPK	Regulatory	MAP kinase	0.08	0.88	2.3	0.74	MA	yes	no	yes	yes				GB: Q8IS82 (Giardia)
12513	SSA12	Uncharacterized	Uncharacterized flagella-associated protein	0.43	0.5	0.26	2.81	MA	no	yes	yes	yes		195496
12568	PACRG (BUG21)	Centriole	Parkin co-regulated chaperone complex protein	0.05	0.88	2.36	0.71	MA	yes	no	yes	yes		97201	82851
12574	RABB1	Regulatory	Rab-type GTPase	1.41	1.18	0.94	0.47	RT	no	yes	yes	yes		148836
12577	DHC14 (ODA4)	Outer dynein arm	Outer dynein arm protein	0.07	0.6	2.82	0.51	RT	yes	no	yes	yes		24252	55628
12594	FAP116	Protein interaction	Microtubule interacting protein	0.52	1.31	1.75	0.43	MA	yes	no	yes	yes		185392	79626
12600	RSP3	Radial spoke	Radial spoke protein	0.21	0.77	2.56	0.47	RT	yes	no	no	yes		138046	64930
12744	CEN3	Regulatory	Centrin (caltractin)	0.26	0.93	2.12	0.69	MA	yes	no	yes	yes				GB: NP_004356 (human)
12763	FBB4	Protein interaction	IQ calmodulin-binding motif protein	0.09	1.2	0.87	1.83	MA	yes	no	yes	yes	yes	135463
12844	FAP111	Protein interaction	Leucine rich repeat protein	0.01	0.19	2.46	1.34	MA	yes	no	yes	yes		185392	4690
12873	DAP1 (MOT45, PF13)	Intraflagellar transport	Intraflagellar transport protein	0.55	1.38	1.79	0.29	MA	yes	no	yes	yes		175396	80717
12878	MAS4	Mastigoneme	Mastigoneme protein	0.04	1.55	2.31	0.1	RT	yes	no	no	yes				GB: BAI39491 O. danica Ocm3
12891	MOT17	Regulatory	IQ calmodulin-binding region	0.32	0.86	1.42	1.4	MA	yes	no	yes	yes	yes	192915	63921
12915	TT8061	Regulatory	Retromer coat complex protein, RAB GTPase	1.5	1.12	1.23	0.16	RT	no	no	yes	yes				TT08061 (Tetrahymena)
12987	FLA8	Intraflagellar transport	Intraflagellar transport kinesin	0.09	0.58	2.88	0.45	RT	yes	no	yes	yes		150766	63939
13031	VFL3	Basal body	Protein required for centriole assembly	0.81	1.06	1.28	0.85	RT	no	no	no	yes		130542
13040	FAP256	Protein interaction	Armadillo fold protein	1.12	0.98	1.08	0.82	MA	no	yes	yes	yes		186225
13069	TAT	Tubulin-related	Centriole-associated tubulin acetyltransferase	0.68	1.16	1.48	0.68	MA	no	no	yes	yes	yes			GB: Q5SQI0 (human)
13132	DLE2 (VFL2)	Regulatory	centrin-like protein	0.65	2.09	1.26	0.31	MA	yes	yes	yes	yes		159554
13145	DII2 (FAP146)	Inner dynein arm	Associates with inner arm	0.11	0.2	2.34	1.36	MA	yes	no	yes	yes		189194	29002
13346	FAP122	Protein interaction	IQ calmodulin-binding region	0.15	0.81	2.74	0.3	RT	yes	no	yes	yes		146448
13367	FM72 (XRP2)	Metabolism	Adenylate cyclase-associated domain	ns	ns	ns	ns			no	yes	yes			64818
13419	PACRG2	Centriole	Parkin co-regulated chaperone complex protein	0.05	0.43	1.71	1.81	RT	yes	no	yes	yes		97201
13461	DIP13	Basal body	Basal body component	0.12	0.45	2.27	1.17	MA	yes	no	yes	yes	yes	131284	71898
13551	FCK	Metabolism	Phosphagen kinase	0.21	2.07	1.26	0.45	MA	yes	no	no	no				GB: P18294 (sea urchin)
13766	IFT121 (FAP118)	Intraflagellar transport	Intraflagellar transport protein	0.36	0.8	2.6	0.24	RT	yes	no	no	yes		195385	32701
13778	DYF-18	Regulatory	Protein kinase	0.76	0.95	0.96	1.32	MA	no	no	yes	no				GB: CAB07422 (C. elegans)
13825	RJL1	Regulatory	Rab-type GTPase	ns	ns	ns	ns			no	yes	yes		3686
13968	DHC16 (DHC1B)	Intraflagellar transport	Dynein heavy chain protein	0.23	0.92	2	0.86	RT	yes	no	no	yes		24009
14010	TT10623	Basal body	Basal body protein	0.08	0.42	3.08	0.42	RT	yes	no	yes	no				TT10623 (Tetrahymena)
14226	IFT46 (FAP32)	Intraflagellar transport	Intraflagellar transport protein	0.06	1.13	2.67	0.14	MA	yes	no	yes	yes	yes	108954	81229
14588	MKS1	Basal body	Ortholog of Meckel Syndrome 1 gene, also centriolar	0.02	0.32	2	1.66	MA	yes	no	yes	yes	yes	130473	52666/29577
14607	MOT19	Uncharacterized	Uncharacterized flagella-associated protein	0.01	0.06	0.93	3	RT	yes	yes	yes	yes		173947
14740	TT18010	Basal body	Basal body protein	0.09	1.28	2.55	0.09	RT	yes	no	no	no				TT18010 (Tetrahymena)
14807	TUG	Tubulin-related	Tubulin gamma	0.96	1.37	1.05	0.62	RT	no	yes	yes	yes		188933	56069
15290	FBB15	Uncharacterized	DUF716 domain-containing protein	0.14	0.62	3.02	0.22	RT	yes	no	yes	yes		169559
15414	DII1 (IDA4, IA-IC28)	Inner dynein arm	Inner dynein arm protein	0.07	1.1	2.29	0.55	MA	yes	no	yes	yes	yes	132451	82719
15572	ARM1	Protein interaction	Armadillo repeat protein	0.17	0.6	2.9	0.33	RT	yes	no	yes	yes		21780
15582	FAP47	Protein interaction	Calponin-like actin-binding protein	0.2	0.57	1.48	1.75	MA	yes	no	no	yes		189076
15625	ODA4(C)	Outer dynein arm	Outer dynein arm protein	ns	ns	ns	ns			no	yes	yes		24252	55628
15780	RSP11	Radial spoke	Radial spoke protein	0.36	0.89	1.69	1.06	RT	yes	no	yes	yes		182635
15793	FAP44	Protein interaction	WD domain protein	1.11	0.89	1.33	0.67	MA	no	no	no	no		149708	29888
16089	SSA4	Uncharacterized	Uncharacterized flagella-associated protein	0.29	0.63	2.64	0.44	RT	yes	no	yes	yes	yes	107835
16112	IFT57	Intraflagellar transport	Intraflagellar transport protein	0.05	0.95	2.68	0.32	MA	yes	no	yes	yes		98642	45002
16331	MOT13	Uncharacterized	Zinc finger, CW-type	0.85	0.94	1.02	1.19	RT	no	no	yes	yes		94516
16674	MOT47	Protein interaction	Leucine-rich repeat protein	ns	ns	ns	ns			no	no	no		107408	31069
16973	DLL2 (ODA13)	Outer dynein arm	Outer dynein arm light chain protein	0.51	1.02	1.75	0.73	RT	yes	no	no	no		128553
16977	CALK	Regulatory	Protein kinase	0.87	ns	0.95	1.18	RT	no	yes	yes	no		145741
17124	FAP46	Central pair	Central pair projection protein	0.3	0.7	2.7	0.3	RT	yes	no	no	yes		141109
17132	RSP17 (FAP59)	Radial spoke	Radial spoke protein	0.22	0.65	1.06	2.07	MA	yes	no	yes	yes		196397	380
17342	PF2 (GAS8)	Regulatory	Dynein regulatory complex	0.07	0.9	2.13	0.89	MA	yes	no	yes	yes		151144
17354	TB-WD	Protein interaction	WD domain protein	0.5	1.69	1.39	0.42	MA	yes	yes	yes	yes				TB10.61.0160 (Trypanosoma)
17768	TT9264	Basal body	Basal body oxidoreductase protein	0.9	1.2	1.62	0.27	RT	no	yes	yes	yes				TT09264 (Tetrahymena)
18032	FAP279	Protein interaction	Leucine-rich repeat protein	ns	ns	ns	ns			no	no	yes		205687
18065	FAP66 (IFT144)	Intraflagellar transport	WD40-containing protein	0.15	0.39	3.05	0.41	RT	yes	no	yes	yes	yes	143468	29690
18071	FM14	Uncharacterized	Protein of unknown function DUF298	0.94	1.42	0.74	0.92	MA	no	yes	yes	yes			49668
18274	TB-PEP	Metabolism	Subtilisin-related peptidase	0.72	0.94	1.19	1.16	MA	no	yes	no	yes				TB927.3.4230 (Trypanosoma)
18352	SSA17	Protein interaction	WW domain protein	0.19	0.67	1.94	1.19	RT	yes	no	no	yes		169222
18373	FAP61	Uncharacterized	Uncharacterized flagella-associated protein	0.27	1.43	2.03	0.28	MA	yes	no	no	yes		144011	73596
18377	TB-AK	Metabolism	Adenylate kinase	0.57	0.64	1.31	1.48	MA	no	no	yes	yes				Tb10.70.7330 (Trypanosoma)
18539	DIC5 (FAP133)	Intraflagellar transport	IFT dynein intermediate chain	ns	ns	ns	ns			no	yes	yes		111920
18578	CDC14	Regulatory	Cell cycle protein phosphatase	0	0.11	2.19	1.7	MA	yes	no	no	no				GB: AAP38170 (P. infestans)
18709	FAP263	Uncharacterized	Uncharacterized flagella-associated protein	0.08	1.66	1.62	0.64	MA	yes	no	yes	yes		154904	63907
18714	IFT80	Intraflagellar transport	Intraflagellar transport protein	0.1	0.38	3.3	0.22	RT	yes	no	yes	yes		24171	77945
18788	UNI3 (TUBULIN-DELTA)	Tubulin-related	Tubulin delta	1.15	0.9	1.28	0.67	MA	no	no	no	yes		136082	69007
19017	FTT18 (BBC78)	Protein interaction	14-3-3 domain protein	1.2	1.07	1.09	0.65	RT	no	yes	yes	yes				TT22399 (Tetrahymena)
19093	FAP240	Uncharacterized	Uncharacterized flagella-associated protein	0.16	1.14	2.29	0.42	RT	yes	no	no	no		93765
19102	CEP76	Basal body	Basal body protein	0.62	1.67	1.03	0.31	MA	yes	no	no	no				GB: EDO78484 (Giardia)
19155	FM134	Uncharacterized	Uncharacterized flagella-associated protein	ns	ns	ns	ns			no	no	no			77673
19212	TUE (BLD2)	Tubulin-related	Tubulin epsilon	1.23	0.71	0.76	1.3	MA	no	no	no	no		188195	44774
19609	DIC2 (ODA6, ODA-IC2)	Outer dynein arm	Outer dynein arm intermediate chain protein	0.08	1.72	1.89	0.31	MA	yes	no	yes	yes		188612	60431/79232
19773	FM166 (CNK2)	Regulatory	Protein kinase, NIMA-related	ns	ns	ns	ns			no	no	no		195107	70275
20054	MOT7	Uncharacterized	Uncharacterized flagella-associated protein	ns	ns	ns	ns			no	no	yes		146683
20157	DIC4 (IC138, BOP5)	Inner dynein arm	Axonemal inner arm protein	ns	ns	ns	ns			no	no	no		158948	63304
20212	IFT172	Intraflagellar transport	Intraflagellar transport protein	0.12	1.73	1.68	0.47	RT	yes	no	yes	yes	yes	183240	63764
20382	FM128 (DNJ29)	Protein interaction	Protein chaperone	0.74	0.82	1.45	2.27	MA	no	yes	yes	yes		31124	4868
20529	MST1	Uncharacterized	Uncharacterized flagella-associated protein	0.31	0.62	1.03	2.05	RT	yes	no	no	yes		574
20609	FM154	Uncharacterized	Uncharacterized flagella-associated protein	0.14	1.89	1.56	0.39	MA	yes	no	no	no			73664
20610	MOT35 (FAP21, BUG15)	Basal body	Basal body associated	ns	ns	ns	ns			no	no	yes		191879
20745	IFT52 (BLD1)	Intraflagellar transport	Intraflagellar transport protein	0.28	1.26	2.37	0.09	MA	yes	no	yes	yes		24116	59637
20749	FAP156 (IFT27)	Regulatory	Ras GTPase	0.8	0.96	1.28	0.96	RT	no	no	no	yes		129193
20801	TB-WW	Protein interaction	WW domain-containing protein	ns	ns	ns	ns			yes	yes	yes				TB927.1.3560 (Trypanosoma)
20902	DLE3 (ODA-DC3, ODA14)	Outer dynein arm	Outer dynein arm docking complex, calcium binding	0.21	0.27	1.76	1.76	MA	yes	no	yes	yes	yes	136411
21013	KAP	Intraflagellar transport	Kinesin-associated protein	0.46	0.98	1.8	0.75	MA	yes	no	yes	yes	yes	182554	79669
21017	HYD3 (HYDIN)	Uncharacterized	Similar to mouse hydrocephaly protein, needed for motility	0.09	0.77	1.84	1.29	MA	yes	no	no	yes		116240	78704
21047	MOT12	Uncharacterized	Uncharacterized flagella-associated protein	0.29	0.65	0.72	2.34	MA	yes	no	no	no		121332	52840
21055	FM46	Uncharacterized	Longevity-assurance protein (LAG1)	1.47	1.05	0.79	0.1	MA	no	yes	no	no			68950
21961	DYF13	Uncharacterized	C. elegans ortholog required for ciliogenesis	0.01	0.65	2.68	0.65	RT	yes	no	yes	yes		81760	80690
22343	SSA5	Uncharacterized	Uncharacterized flagella-associated protein	0.86	1.45	0.09	1.6	MA	no	yes	unclear	unclear		176942
sc14:304200	FAP184	Regulatory	Rho-associated, coiled-coil w/kinase domain	0.03	0.31	3.39	0.28	MA	yes	no	yes	yes		192295	2066
